# Supplementary material for: High matrix metalloproteinase-2 expression predicts poor prognosis of colon adenocarcinoma and is associated with PD-L1 expression and lymphocyte infiltration
Source: PeerJ journal article supplement (doi:10.7717/peerj.19550), 2025-06-30

Original blots and images:

Original blots Western blots of knockdown-MMP-2 and PD-L1 under the intervention of MMP-2 in SW480 cells.

Original blots of Figure 5B

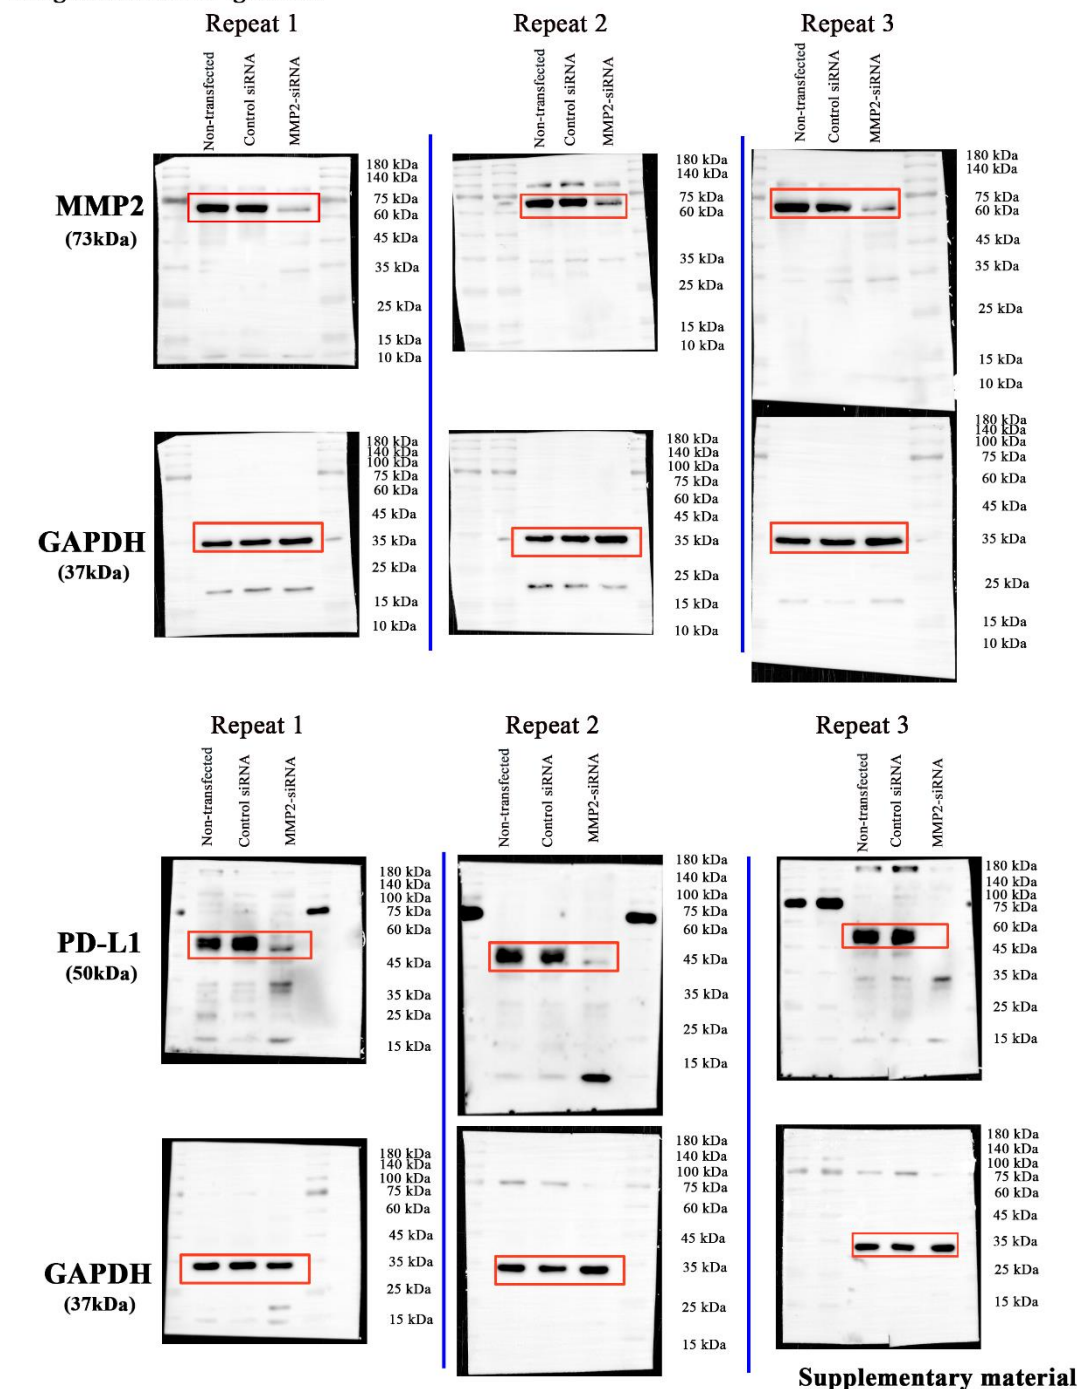

Supplement: Original_Blots_and_Images_of_Figure_5B.pdf [file Original_Blots_and_Images_of_Figure_5B.pdf]
