# Supplementary material for: High matrix metalloproteinase-2 expression predicts poor prognosis of colon adenocarcinoma and is associated with PD-L1 expression and lymphocyte infiltration
Source: PeerJ. 2025 Jun 30;13:e19550. doi: 10.7717/peerj.19550 (PMC12225630; doi:10.7717/peerj.19550)
Supplement: Supplemental Information 1 — The western blot raw data of relative expression of MMP-2/GAPDH and PD-L1/GAPDH. [file peerj-13-19550-s001.xlsx]

## Sheet: SW480
		PD-L1		GADPH	PD-L1/GAPDH	Non-transfected	Control siRNA	MMP2-siRNA				MMP2		GADPH	MMP-2/GAPDH	Non-transfected	Control siRNA	MMP2-siRNA
Group-1	Non-transfected	38136.3	Non-transfected	48067.8	0.793385	0.793385	0.954946	0.480737		Group-1	Non-transfected	53555.6	Non-transfected	47696.1	1.12285	1.12285	0.950332	0.217045
	Control siRNA	48563.7	Control siRNA	50854.9	0.954946	1.14703	1.18173	0.0265513			Control siRNA	47341	Control siRNA	49815.2	0.950332	1.28701	1.06771	0.338394
	MMP2-siRNA	19999.9	MMP2-siRNA	41602.7	0.480737	1.00829	0.929692	0.190558			MMP2-siRNA	12594.8	MMP2-siRNA	58028.8	0.217045	1.29437	1.11535	0.469872
Group-2	Non-transfected	49431	Non-transfected	43094.8	1.14703					Group-2	Non-transfected	53046.4	Non-transfected	41216.9	1.28701
	Control siRNA	45613.7	Control siRNA	38599.2	1.18173						Control siRNA	44053.7	Control siRNA	41260.1	1.06771
	MMP2-siRNA	1151.99	MMP2-siRNA	43387.3	0.0265513						MMP2-siRNA	17054.1	MMP2-siRNA	50397.2	0.338394
Group-3	Non-transfected	43907.8	Non-transfected	43546.8	1.00829					Group-3	Non-transfected	52617	Non-transfected	40650.8	1.29437
	Control siRNA	34250.1	Control siRNA	36840.3	0.929692						Control siRNA	51499.4	Control siRNA	46173.3	1.11535
	MMP2-siRNA	8888.8	MMP2-siRNA	46646.1	0.190558						MMP2-siRNA	28699.5	MMP2-siRNA	61079.4	0.469872
	Tukey's multiple comparisons test	Mean Diff.	95.00% CI of diff.	Below threshold?	Summary	Adjusted P Value					Tukey's multiple comparisons test	Mean Diff.	95.00% CI of diff.	Below threshold?	Summary	Adjusted P Value
	Non-transfected vs. Control siRNA	-0.03922	-0.5055 to 0.4270	No	ns	0.9642	A-B				Non-transfected vs. Control siRNA	0.1903	-0.07090 to 0.4515	No	ns	0.1431	A-B
	Non-transfected vs. MMP2-siRNA	0.7503	0.2840 to 1.217	Yes	**	0.0063	A-C				Non-transfected vs. MMP2-siRNA	0.893	0.6318 to 1.154	Yes	***	0.0001	A-C
	Control siRNA vs. MMP2-siRNA	0.7895	0.3233 to 1.256	Yes	**	0.0049	B-C				Control siRNA vs. MMP2-siRNA	0.7027	0.4415 to 0.9639	Yes	***	0.0004	B-C

## Sheet: Caco-2
		PD-L1		GADPH	PD-L1/GAPDH	Non-transfected	Control siRNA	MMP2-siRNA				MMP2		GADPH	MMP-2/GAPDH	Non-transfected	Control siRNA	MMP2-siRNA
Group-1	Non-transfected	48794.6	Non-transfected	44828.6	1.08847	1.08847	1.29497	0.193819		Group-1	Non-transfected	50005.9	Non-transfected	56682.3	0.882213	0.882213	0.872481	0.138664
	Control siRNA	51227.6	Control siRNA	39558.8	1.29497	1.14007	0.926201	0.24276			Control siRNA	53632.2	Control siRNA	61470.9	0.872481	1.0396	1.03112	0.0406138
	MMP2-siRNA	6835.3	MMP2-siRNA	35266.4	0.193819	0.983481	0.918285	0.0817621			MMP2-siRNA	6851.15	MMP2-siRNA	49408.1	0.138664	0.854366	0.544241	0.0163519
Group-2	Non-transfected	50902.8	Non-transfected	44649	1.14007					Group-2	Non-transfected	49723.7	Non-transfected	47829.7	1.0396
	Control siRNA	38514	Control siRNA	41582.7	0.926201						Control siRNA	40789.6	Control siRNA	39558.4	1.03112
	MMP2-siRNA	6132.25	MMP2-siRNA	25260.6	0.24276						MMP2-siRNA	1296.31	MMP2-siRNA	31917.8	0.0406138
Group-3	Non-transfected	51119.8	Non-transfected	51978.5	0.983481					Group-3	Non-transfected	36655.6	Non-transfected	42903.8	0.854366
	Control siRNA	48846.7	Control siRNA	53193.4	0.918285						Control siRNA	48853.8	Control siRNA	89765.1	0.544241
	MMP2-siRNA	3476.45	MMP2-siRNA	42519	0.0817621						MMP2-siRNA	1303.98	MMP2-siRNA	79745.1	0.0163519

## Sheet: MMP2-inh
		PD-L1		GADPH	PD-L1/GAPDH	Non-transfected	Control siRNA	MMP2-inh	MMP2-siRNA				MMP2		GADPH	MMP-2/GAPDH	Non-transfected	Control siRNA	MMP2-inh	MMP2-siRNA
Group-1	Non-transfected	40837.7	Non-transfected	39447.6	1.03524	1.03524	1.06051	0.83364	0.556109		Group-1	Non-transfected	47276.4	Non-transfected	38764.3	1.21959	1.21959	1.1717	0.181438	0.11016
	Control siRNA	40157.8	Control siRNA	37866.6	1.06051	1.17984	1.21688	0.815676	0.69863			Control siRNA	38030.1	Control siRNA	32457.2	1.1717	0.618756	0.795813	0.407885	0.0435491
	MMP2-inh	26584.5	MMP2-inh	31889.6	0.83364	1.25029	1.06487	0.554872	0.581286			MMP2-inh	6980.76	MMP2-inh	38474.7	0.181438	1.10695	1.29076	0.274785	0.0571678
	MMP2-siRNA	18224.6	MMP2-siRNA	32771.7	0.556109							MMP2-siRNA	3261.86	MMP2-siRNA	29610.3	0.11016
Group-2	Non-transfected	38788.1	Non-transfected	32875.8	1.17984						Group-2	Non-transfected	30535.8	Non-transfected	49350.3	0.618756
	Control siRNA	41128.6	Control siRNA	33798.3	1.21688							Control siRNA	34615.7	Control siRNA	43497.2	0.795813
	MMP2-inh	25965.3	MMP2-inh	31832.9	0.815676							MMP2-inh	15905.8	MMP2-inh	38995.6	0.407885
	MMP2-siRNA	23937.7	MMP2-siRNA	34263.7	0.69863							MMP2-siRNA	1620.43	MMP2-siRNA	37209.2	0.0435491
Group-3	Non-transfected	38320.6	Non-transfected	30649.3	1.25029						Group-3	Non-transfected	39509.5	Non-transfected	35692.3	1.10695
	Control siRNA	41805.8	Control siRNA	39259.2	1.06487							Control siRNA	40816.3	Control siRNA	31621.8	1.29076
	MMP2-inh	16784.1	MMP2-inh	30248.6	0.554872							MMP2-inh	9103.29	MMP2-inh	33128.8	0.274785
	MMP2-siRNA	18457.6	MMP2-siRNA	31753.1	0.581286							MMP2-siRNA	2257.18	MMP2-siRNA	39483.5	0.0571678
