# Supplementary material for: High matrix metalloproteinase-2 expression predicts poor prognosis of colon adenocarcinoma and is associated with PD-L1 expression and lymphocyte infiltration
Source: PeerJ. 2025 Jun 30;13:e19550. doi: 10.7717/peerj.19550 (PMC12225630; doi:10.7717/peerj.19550)
Supplement: Supplemental Information 3 [file peerj-13-19550-s003.xlsx]

## Sheet: Sheet1
Category Term Count % PValue Genes List Total Pop Hits Pop Total Fold Enrichment Bonferroni Benjamini FDR
GOTERM_BP_DIRECT GO:0006955~immune response 205 11.960326721120186 1.601291298843816E-129 IL1RN, LST1, IGHV3-23, AQP9, VPREB3, IGLV2-8, VPREB1, IGKV1-16, IGKV1-17, TRBC1, IGHV3-7, TRIM22, CMKLR1, GBP6, IGHV3-30, IGHV3-33, SLC11A1, CHIT1, IGKV2D-28, IGKV4-1, IGSF6, IGHV1-69, CFP, C3, CD79B, C7, ICOS, IGHA1, HLA-DQA2, IGHA2, HLA-DQA1, CCR1, NGFR, HLA-DRB5, TNFSF14, HLA-DRB9, IGHV3-11, IGHV3-13, TNF…
GOTERM_BP_DIRECT GO:0050776~regulation of immune response 119 6.942823803967328 6.506191731060926E-96 IGHV3-23, TRAC, ICAM3, SLA2, ICAM1, IGLV2-8, IGKV1-16, IGKV1-17, TRBC1, IGHV3-7, CD96, IGHV3-30, CD300A, IGHV3-33, IGKV1D-39, IGKV1D-33, OSCAR, TYROBP, IGKV2D-28, JAML, CD8B, IGKV4-1, CD300E, CD226, CD300C, KLRB1, IGHV4-59, IGHV1-69, KIR2DL1, CD1C, CD1B, KIR2DL3, KIR2DL4, IGLV2-11, C3, KLRK1, IGL…
GOTERM_BP_DIRECT GO:0006958~complement activation, classical pathway 75 4.3757292882147025 1.9025204547143304E-66 IGHM, IGHV3-23, IGHV4-34, IGHV1-46, IGKV3D-11, IGHV4-39, IGLV2-8, IGHG3, IGHG4, C4A, IGHG1, IGHG2, IGKV1-16, IGKV1-17, IGLC3, IGLC2, IGHV3-7, IGHV4OR15-8, CR2, IGHV3-30, CR1, IGHV3-33, IGKV1D-39, IGKV1D-33, IGKV2D-28, IGHD, IGKV4-1, IGHE, SERPING1, IGKV2-30, IGLV3-19, IGHV1OR21-1, IGH…
GOTERM_BP_DIRECT GO:0006956~complement activation 65 3.7922987164527426 8.505181948772698E-57 FCN1, IGHV3-23, IGHV4-34, IGHV1-46, IGKV3D-11, IGHV4-39, IGLV2-8, IGHG3, IGHG4, C4A, IGHG1, IGHG2, IGKV1-16, IGKV1-17, IGLC3, IGLC2, IGHV3-7, IGHV3-30, IGHV3-33, IGKV1D-39, IGKV1D-33, IGKV2D-28, IGKV4-1, IGKV2-30, IGLV3-19, IGHV2-70, C1QB, C1QA, IGHV2-5, CFH, C1S, IGHV4-59, IGHV3-48, IGLV3-1, IGHV1-69, C…
GOTERM_BP_DIRECT GO:0006954~inflammatory response 122 7.117852975495915 2.2539475927929006E-51 NRROS, CSF1, GPR68, CCL4L2, CXCL13, C4A, IL18RAP, C3AR1, PROK2, TNFRSF8, PTGDR, GBP5, SLC11A1, CD180, CYBB, ACOD1, S100A8, CSF1R, CCL3L3, C5AR1, FPR1, LY96, FPR3, FPR2, MEFV, C3, CLEC7A, HRH4, S100A12, NLRP1, CD14, CCR1, NGFR, XCR1, TNFRSF9, LY86, SELE, SELP, CXCL10, CXCL11, IL6, VNN1, CD27, ORM1, CIITA…
GOTERM_BP_DIRECT GO:0038096~Fc-gamma receptor signaling pathway involved in phagocytosis 66 3.8506417736289387 7.709486910628628E-43 WIPF1, IGHV3-23, IGHV4-34, CD3G, IGHV1-46, IGKV3D-11, IGHV4-39, IGLV2-8, IGHG3, IGHG4, FCGR3A, IGHG1, IGHG2, IGKV1-16, IGKV1-17, IGLC3, IGLC2, IGHV3-7, IGHV3-30, IGHV3-33, IGKV1D-39, IGKV1D-33, FGR, HCK, IGKV2D-28, IGKV4-1, IGKV2-30, IGLV3-19, IGHV2-70, IGHV2-5, WAS…
GOTERM_BP_DIRECT GO:0045087~innate immune response 119 6.942823803967328 1.5092252432368703E-42 CD84, PGLYRP2, NRROS, NCF1, CSF1, NCF2, CLEC10A, IGHV3-23, IGHG3, IGHG4, C4A, BPIFA1, IGHG1, IGHG2, CLEC5A, ZNF683, CD180, MATK, CYBB, CLEC4A, CLEC4C, TYROBP, CLEC4D, BTK, SERPING1, CD300E, CLEC4E, S100A8, IGHV1OR21-1, BLK, CSF1R, LY96, GATA3, DDX60, LY9, KLRK1, CLEC7A, CD300LB, S100A12, TRDC, SLAMF6, …
GOTERM_BP_DIRECT GO:0002250~adaptive immune response 69 4.025670945157526 7.364548856916164E-41 CD86, IGHM, ITK, CD84, TNFRSF13B, IGHV1OR15-1, CLEC10A, PIK3CD, TNFRSF13C, PIK3CG, JCHAIN, ADGRE1, SIT1, CTSL, IGKV2-28, LAMP3, IGKV1-12, CTLA4, JAK2, JAK3, HAVCR2, EOMES, ZNF683, PRKCB, FCRL4, THEMIS, IGKV3D-20, TAP1, LAX1, CLEC4A, ZAP70, CLEC4C, CLEC4D, IFNG, CD8B, BTK, LILRA6, IGKV2D-30, LILRA1, CD1…
GOTERM_BP_DIRECT GO:0006898~receptor-mediated endocytosis 76 4.434072345390899 4.540495947550549E-40 IGHV3-23, IGHV4-34, IGHV1-46, IGKV3D-11, IGHV4-39, CLEC9A, JCHAIN, IGLV2-8, IGKV1-16, IGKV1-17, MRC1, ENPP2, IGLC3, OLR1, CD36, IGLC2, IGHV3-7, IGHV3-30, SCARA5, IGHV3-33, IGKV1D-39, IGKV1D-33, IGKV2D-28, ADRB3, IGKV4-1, IGKV2-30, IGLV3-19, COLEC12, IGHV2-70, IGHV2-5, CD163L1, CD5L, IGHV4-59, IGHV…
GOTERM_BP_DIRECT GO:0050853~B cell receptor signaling pathway 39 2.2753792298716453 6.131060195914385E-33 BLK, IGHM, IGHV3-23, PIK3CD, CD79B, IGHG3, CD79A, IGHG4, IGHG1, IGHG2, IGKC, CD19, IGLC3, PLCG2, CTLA4, CD38, TRDC, NCKAP1L, IGLC2, IGHA1, IGHV4OR15-8, IGHA2, IGLC7, PRKCB, NFAM1, IGLC6, IGLL5, ZAP70, PTPRC, KLHL6, IGLL1, LCK, BCL2, IGHD, BTK, IGHE, MNDA, IGHV3OR16-9, IGHV1OR21-1 1112 54 1679…
GOTERM_BP_DIRECT GO:0038095~Fc-epsilon receptor signaling pathway 59 3.4422403733955655 1.5111936075225391E-25 ITK, IGHV3-23, IGHV4-34, IGHV1-46, IGKV3D-11, IGHV4-39, IGLV2-8, IGKV1-16, IGKV1-17, IGLC3, IGLC2, IGHV3-7, IGHV3-30, FCER1G, IGHV3-33, IGKV1D-39, IGKV1D-33, IGKV2D-28, BTK, IGKV4-1, IGHE, LCP2, MS4A2, IGKV2-30, IGLV3-19, IGHV2-70, IGHV2-5, IGHV4-59, IGHV3-48, IGLV3-1, IGHV1-69, IGLV2-11…
GOTERM_BP_DIRECT GO:0070098~chemokine-mediated signaling pathway 38 2.2170361726954493 2.8720263552657843E-25 CCL13, CXCL9, CXCL8, CCL4L2, CCL3L3, CXCR5, CXCR4, CXCR6, CXCL13, CXCL5, CX3CL1, CCL8, CCL7, CXCR1, CCL5, CCL4, CCL3, CCL2, CCR8, CCL1, CCL19, CCR5, CCL18, CCR4, CCL17, CCR2, CMKLR1, CCR1, CCL25, CCL23, XCR1, CCL22, CCL21, CXCL10, CXCL11, ACKR4, XCL2, ACKR1 1112 71 16792 8.082075184922486…
GOTERM_BP_DIRECT GO:0006910~phagocytosis, recognition 24 1.4002333722287048 4.244443770867129E-23 COLEC12, IGHM, IGLC7, IGLC6, IGHV3-23, IGHG3, IGLL5, IGHG4, IGHG1, IGHG2, IGKC, CLEC7A, IGLL1, IGHD, IGLC3, IGHE, TRDC, IGLC2, IGHV3OR16-9, CD36, IGHA1, IGHA2, IGHV4OR15-8, IGHV1OR21-1 1112 28 16792 12.943473792394657 1.5466753101039818E-19 1.1897502385415245E-20 1.1515502446037203E-20
GOTERM_BP_DIRECT GO:0050871~positive regulation of B cell activation 23 1.3418903150525088 1.063014065153513E-22 IGHM, IGLC7, IGLC6, IGHV3-23, IGHG3, IGLL5, IGHG4, IGHG1, IL6, IGHG2, IGKC, IGLL1, TNFSF4, IGHD, IGLC3, IGHE, TRDC, IGLC2, IGHV3OR16-9, IGHA1, IGHA2, IGHV4OR15-8, IGHV1OR21-1 1112 26 16792 13.358328721638074 3.873623253419401E-19 2.7668737524424295E-20 2.6780361484260287E-20
GOTERM_BP_DIRECT GO:0006935~chemotaxis 46 2.6837806301050176 1.291658815815833E-22 CCL13, CXCL9, CXCL8, C5AR1, PTAFR, CXCR5, FPR1, CXCR4, LSP1, CXCR6, FPR2, FGF2, CXCL5, CX3CL1, TYMP, SPN, CYSLTR1, CCL8, CCL7, CXCR1, CCL5, CCL3, C3AR1, ENPP2, PROK2, CCL2, CCR8, CCL1, CCR7, NCKAP1L, CCR5, CCL18, CCR4, CCL17, CCR2, CMKLR1, CCR1, CCL25, CCL23, XCR1, CCL22, CMTM5, CXCL10, CXCL11, ACKR4, DOCK2 1112 12…
GOTERM_BP_DIRECT GO:0031295~T cell costimulation 36 2.100350058343057 3.3069469888471555E-21 CD86, CD274, CD80, TRAC, CD3G, TNFRSF13C, CD3E, CD3D, TRBV12-3, TNFSF13B, SPN, KLRK1, KLRC4-KLRK1, TRBC1, BTLA, CTLA4, CCL19, ICOS, HLA-DQA2, HLA-DQA1, HLA-DPA1, HLA-DRB5, CCL21, TNFSF14, PDCD1LG2, CD4, CD40LG, LCK, HLA-DPB1, CD28, HLA-DRA, PDCD1, CD247, HLA-DQB2, HLA-DRB1, HLA-DQB1 1112 78 16792 6.969562…
GOTERM_BP_DIRECT GO:0006911~phagocytosis, engulfment 25 1.4585764294049008 7.82081918536751E-21 IGHM, IGHV3-23, TREM2, AIF1, IGHG3, IGHG4, IGHG1, IGHG2, IGKC, IGLC3, TRDC, IGLC2, FCGR1A, IGHA1, IGHV4OR15-8, IGHA2, FCER1G, IGLC7, IGLC6, IGLL5, IGLL1, IGHD, IGHE, IGHV3OR16-9, IGHV1OR21-1 1112 35 16792 10.78622816032888 2.8499065111479207E-17 1.6764155947928944E-18 1.622589956870071E-18
GOTERM_BP_DIRECT GO:0042102~positive regulation of T cell proliferation 30 1.7502917152858808 6.421347754718308E-19 SASH3, IL21, CD274, TNFRSF13C, CD3E, AIF1, TNFSF13B, SPN, SPTA1, HLA-DMB, CCL5, IL12B, NCKAP1L, CCL19, JAK3, HAVCR2, HLA-DPA1, VCAM1, LILRB2, PDCD1LG2, CD4, IL6, PTPRC, CD40LG, IFNG, CD6, LEP, TNFSF4, HLA-DPB1, CD28 1112 60 16792 7.5503597122302155 2.3399391218193516E-15 1.299966178…
GOTERM_BP_DIRECT GO:0030593~neutrophil chemotaxis 31 1.8086347724620768 1.4332256778992266E-18 CCL13, CSF3R, CXCL8, CCL4L2, CCL3L3, C5AR1, ITGB2, PIK3CD, TREM1, CX3CL1, PIK3CG, CCL8, CCL7, CCL5, CCL4, CCL3, S100A12, CCL2, CCL1, NCKAP1L, CCL18, CCL17, CCL25, CCL23, FCER1G, CCL22, IFNG, JAML, SAA1, XCL2, S100A8 1112 66 16792 7.092762153913233 5.222674370264782E-15 2.7144582030075787E-16 2.627303535…
GOTERM_BP_DIRECT GO:0071346~cellular response to interferon-gamma 29 1.691948658109685 1.4898233825508116E-18 CCL13, CIITA, CCL4L2, CCL3L3, AIF1, CX3CL1, CCL8, CCL7, CCL5, MRC1, CCL4, CCL3, IL12B, CCL2, CCL1, CCL19, IL12RB1, CCL18, CCL17, HLA-DPA1, GBP6, CCL25, GBP5, CCL23, CCL22, CCL21, DAPK1, ACOD1, XCL2 1112 57 16792 7.682822163321974 5.428916406015157E-15 2.7144582030075787E-16 2.627303535128…
GOTERM_BP_DIRECT GO:0006968~cellular defense response 30 1.7502917152858808 2.0119397627839304E-18 ITK, CXCL9, FCMR, NCF1, NCF2, C5AR1, CD5L, PRF1, LY96, LSP1, KIR2DL4, SPN, GNLY, CD19, CLEC5A, CCR5, CCR2, KLRG1, KLRC2, TRAT1, KLRC3, KLRC4, SH2D1A, KIR3DL2, LILRB2, NCR1, NCR2, TYROBP, MNDA, CD300C 1112 62 16792 7.306799721513111 7.331508495584642E-15 3.4911945217069725E-16 3.3791007349232967E-16
GOTERM_BP_DIRECT GO:0006508~proteolysis 89 5.192532088681447 1.0585781437075775E-17 PCSK2, FCN1, TPSB2, IGHV3-23, IGHV4-34, IGKV3D-11, IGHV4-39, PRSS21, IGLV2-8, IGHG3, IGHG4, C4A, MMP25, IGHG1, IGHG2, IGKV1-16, IGKV1-17, CTSL, IGLC3, OLR1, CTSG, IGLC2, TPSAB1, IGHV3-7, CPA3, CPA1, IGHV3-30, MMP1, IGHV3-33, MMP2, IGKV1D-39, IGKV1D-33, MMP12, SFRP1, IGKV2D-28, ADAM12, DPEP2, IGKV4-1, PRTN3, IGKV2-…
GOTERM_BP_DIRECT GO:0007166~cell surface receptor signaling pathway 61 3.5589264877479576 6.60042984092807E-17 SIGLEC9, TNFRSF13B, NPY2R, CD3G, CD3E, CXCL13, CD3D, SIRPB1, SPN, ADGRE1, ADGRE2, CYSLTR1, IL18RAP, ADGRE3, CD37, CD36, CCR5, ADGRE4P, CD53, LAG3, CLEC4A, DOK2, IFNG, ADGRB2, ADGRB3, EVL, BIRC3, CD274, ADCYAP1R1, IGSF6, KLRB1, GPR88, LY96, LILRA1, MCHR1, TSPAN32, ADGRG3, CXCR1, CD19, CCL…
GOTERM_BP_DIRECT GO:0007165~signal transduction 150 8.751458576429405 1.0532272857864309E-15 SH3GL3, CSF3R, GUCA1A, IL5RA, OR52N4, FGF2, FGF7, SIT1, RGS1, CLEC5A, TNFRSF8, HLA-DOA, HLA-DOB, ARRDC5, UNC5A, CD300A, DAPK1, PRKCB, ANK1, HPCAL4, DOK2, TYROBP, CD226, ZNF831, CD300C, CSF1R, CD274, PDE1B, C5AR1, FPR1, FPR3, CSF2RB, GATA3, ARHGAP15, RASAL3, RASGRP2, RASGRP1, KIR2DL4, C3, CD79B, ARHGAP20, …
GOTERM_BP_DIRECT GO:0002548~monocyte chemotaxis 22 1.2835472578763127 2.0099536861715005E-14 CCL25, CCL13, CCL23, CCL22, CCL21, CCL3L3, CCL4L2, CX3CL1, IL6, CCL8, CCL7, CCL5, CCL4, CCL3, XCL2, S100A12, CCL2, CCL1, CCL19, FOLR2, CCL18, CCL17 1112 42 16792 7.909900650907844 7.322631390138667E-11 2.929708492963579E-12 2.835642660450753E-12
GOTERM_BP_DIRECT GO:0050729~positive regulation of inflammatory response 28 1.633605600933489 4.12075876986637E-14 IL21, CCL13, CCL4L2, CCL3L3, SERPINE1, PLA2G7, CX3CL1, CCL8, CCL7, CCL5, CCL4, CCL3, IL12B, S100A12, CCL2, CCL1, JAK2, CCL18, CCR2, CCL23, IL2, FABP4, TNFSF4, XCL2, TLR10, TLR7, S100A8, TLR2 1112 73 16792 5.792056765546467 1.5009371523433401E-10 5.775401906689636E-12 5.58996776204564…
GOTERM_BP_DIRECT GO:0032496~response to lipopolysaccharide 42 2.4504084014002334 6.409723991436322E-14 CXCL9, CD40, C5AR1, LY96, CSF2RB, FASLG, CXCL13, PTGS2, CXCL5, IL18BP, CNR2, CNR1, PENK, PLCG2, TNFRSF8, ACP5, CCR7, CTSG, JAK2, NGFR, CD96, VCAM1, IL10RA, TNFRSF18, TNFRSF9, SLC11A1, IL13, FMO1, SELE, DCN, SELP, P2RX7, CXCL10, CXCL11, CD6, GJB6, LTA, CD27, ALPL, S100A8, IDO1, TLR2 1112 164 1679…
GOTERM_BP_DIRECT GO:0042742~defense response to bacterium 39 2.2753792298716453 1.062072898806518E-13 CEBPE, IGHV3-23, DEFB124, CXCL13, CFP, SPN, IGHG3, IGHG4, IGHG1, IGHG2, IGKC, BPIFA2, GNLY, IGLC3, S100A12, TRDC, NLRP1, IGLC2, IGHV4OR15-8, IL10, GBP6, FCER1G, IGLC7, SLC11A1, IGLC6, NR1H4, TLR1, IGLL5, CLEC4D, IFNG, IGLL1, IGHD, IGHE, IGHV3OR16-9, TLR6, CLEC4E, HAMP, S100A8, IGHV1OR21-1 1112 14…
GOTERM_BP_DIRECT GO:0071222~cellular response to lipopolysaccharide 34 1.9836639439906651 1.5897882712724492E-13 CD86, CD40, CSF2, CXCL8, CEBPE, CD80, GFI1, SERPINE1, ICAM1, KLRK1, MRC1, KLRC4-KLRK1, ANKRD1, IL12B, CCL2, STAP1, CD14, CD36, CCR5, HAVCR2, IL10, CD180, NR1H4, ACOD1, LILRB1, LILRB2, AICDA, CXCL10, IL6, IFNG, TNIP3, TNFSF4, CMPK2, HAMP 1112 113 16792 4.543579295855351 5.79337466888318…
GOTERM_BP_DIRECT GO:0060333~interferon-gamma-mediated signaling pathway 27 1.575262543757293 1.607389679925993E-13 CIITA, PTAFR, IFI30, ICAM1, MT2A, JAK2, GBP2, FCGR1A, GBP1, FCGR1B, HLA-DQA2, TRIM22, HLA-DQA1, HLA-DPA1, HLA-DRB5, VCAM1, STAT1, HCK, IFNG, OAS2, IRF4, IRF1, HLA-DPB1, HLA-DRA, HLA-DQB2, HLA-DRB1, HLA-DQB1 1112 71 16792 5.742527105076503 5.858105112110934E-10 1.8894606431130062E-11 …
GOTERM_BP_DIRECT GO:0071347~cellular response to interleukin-1 27 1.575262543757293 1.607389679925993E-13 CCL13, CXCL8, CCL4L2, CCL3L3, CX3CL1, ICAM1, CCL8, CCL7, CCL5, CCL4, CCL3, ANKRD1, CCL2, CCL1, CCL19, CCL18, CCL17, NKX3-1, CCL25, CCL23, CCL22, PTGIS, CCL21, ACOD1, SFRP1, IL6, XCL2 1112 71 16792 5.742527105076503 5.858105112110934E-10 1.8894606431130062E-11 1.8287946455157992E-11
GOTERM_BP_DIRECT GO:0071356~cellular response to tumor necrosis factor 33 1.9253208868144693 4.1751134582805867E-13 CCL13, CXCL8, CCL4L2, CCL3L3, GATA3, CX3CL1, IL18BP, ICAM1, CCL8, CCL7, CCL5, CCL4, CCL3, ANKRD1, CCL2, CCL1, CCL19, CCL18, CCL17, NKX3-1, CCL25, POSTN, CCL23, CCL22, VCAM1, CCL21, ACOD1, DCSTAMP, SFRP1, IL6, FABP4, XCL2, HAMP 1112 110 16792 4.53021582733813 1.5215699811221839E-9 4.…
GOTERM_BP_DIRECT GO:0007155~cell adhesion 75 4.3757292882147025 6.479544341233143E-13 SRPX, PTPRU, CSF3R, SIGLEC9, ITGAM, TNFAIP6, ITGB2, SIRPG, ICAM3, HAPLN3, ITGAL, CX3CL1, ICAM1, COMP, ADGRE1, ADGRE2, PSTPIP1, CHL1, ITGAX, CYP1B1, CCR8, OLR1, ITGB7, PLXNC1, CD36, CD33, CD96, POSTN, CD300A, CLEC4A, HCK, MMRN1, ITGAD, ADAM12, CD226, COL6A5, NLGN1, SELPLG, TNXB, DPT, FPR2, THBS2, GPNMB, HAS1, CCL…
GOTERM_BP_DIRECT GO:0048247~lymphocyte chemotaxis 17 0.9918319719953326 1.7332896878252464E-12 CCL25, CCL13, CCL23, CCL22, CCL21, CCL3L3, CCL4L2, CX3CL1, CCL8, CCL3, SAA1, XCL2, CCL2, CCL1, CCL19, CCL18, CCL17 1112 28 16792 9.168293936279548 6.316072997947231E-9 1.8576787124809405E-10 1.798033155576366E-10
GOTERM_BP_DIRECT GO:0007267~cell-cell signaling 50 2.9171528588098017 8.803804608268365E-12 CD86, CXCL9, TNFAIP6, CD80, ITGB2, SIRPG, FASLG, CXCL13, CXCL5, GJA3, CCR5, CD33, INSL4, IL10, FCRL2, IL13, SSTR3, GREM1, ADCYAP1, SFRP2, ADRB3, LTA, LTB, C1QA, CCL13, TSPAN32, CCL8, CCL7, CCL5, CCL4, CCL3, WNT1, CCL18, CCL17, CCR1, CCL23, CCL22, CCL21, SH2D1A, LILRB2, TSHR, IL2, BST2, CXCL10, CXCL11, TNFS…
GOTERM_BP_DIRECT GO:0002504~antigen processing and presentation of peptide or polysaccharide antigen via MHC class II 13 0.7584597432905484 3.0156736222087434E-11 HLA-DRB5, HLA-DMA, HLA-DMB, HLA-DPB1, HLA-DRA, HLA-DOA, HLA-DOB, HLA-DQA2, HLA-DQA1, HLA-DQB2, HLA-DRB1, HLA-DPA1, HLA-DQB1 1112 17 16792 11.547608971646211 1.0989124921145788E-7 3.0525318553690728E-9 2.9545224626472886E-9
GOTERM_BP_DIRECT GO:0007204~positive regulation of cytosolic calcium ion concentration 33 1.9253208868144693 1.3164050394166508E-10 NPY2R, C5AR1, FPR1, OPRL1, CXCR4, FPR3, FPR2, CXCL13, MCHR1, PIK3CG, CYSLTR1, CCKAR, HRH4, C3AR1, PROK2, CCR8, CD38, CCR7, CD36, JAK2, CCR5, CCR4, S1PR4, CCR2, PTGDR, CCR1, CD52, RIC3, XCR1, IL2, ADCYAP1, SAA1, NMUR2 1112 134 16792 3.7188338881133896 4.79697780608745…
GOTERM_BP_DIRECT GO:0070374~positive regulation of ERK1 and ERK2 cascade 38 2.2170361726954493 2.1161028995876952E-10 CCL13, CSF1R, CCL4L2, CCL3L3, C5AR1, TREM2, FGF2, RASGRP1, CX3CL1, ICAM1, CYSLTR2, CCL8, CCL7, GPNMB, CCL5, CCL4, CCL3, CCL2, CCL1, CCR7, CCL19, CD36, CCL18, CCL17, HAVCR2, SLAMF1, CCR1, CCL25, NTRK1, CD74, CCL23, CCL22, CCL21, SCIMP, ADCYAP1, IL6, GPR183, XCL2 1112 175 16792 3.27…
GOTERM_BP_DIRECT GO:0042110~T cell activation 19 1.1085180863477246 3.747279408908331E-10 CD86, ITK, TNFSF14, CD80, WAS, PIK3CD, NLRC3, CD3G, SLA2, CD3E, FOXP3, PIK3CG, CD2, ZAP70, CD8B, CLEC7A, IRF4, CD7, CD48 1112 47 16792 6.1045461503137926 1.3655075915552928E-6 3.501304145144092E-8 3.3888857628768416E-8
GOTERM_BP_DIRECT GO:0050900~leukocyte migration 30 1.7502917152858808 1.0817973608077515E-9 CD84, SELPLG, ITGAM, C5AR1, ITGB2, SIRPG, FPR1, FPR3, DBH, FPR2, ITGAL, TREM1, ICAM1, SPN, C3AR1, ITGAX, OLR1, CD177, CD74, FCER1G, MMP1, SELE, SELP, CD2, DOK2, SELL, JAML, LCK, CD48, CD244 1112 122 16792 3.713291661752565 3.942061660433538E-6 9.855173956958615E-8 9.538748228922348E-8
GOTERM_BP_DIRECT GO:0006959~humoral immune response 20 1.1668611435239207 1.913171472206024E-9 EBI3, SH2D1A, LY86, TREM2, GATA3, PAX5, POU2F2, TREM1, BST2, IL6, IFNG, POU2AF1, GPR183, CD28, LTA, BCL2, CCL2, PDCD1, MS4A1, LTF 1112 57 16792 5.298498043670326 6.9715726879193696E-6 1.6868626806541312E-7 1.6327016121479475E-7
GOTERM_BP_DIRECT GO:0050852~T cell receptor signaling pathway 33 1.9253208868144693 1.944243484837363E-9 ITK, TRAC, WAS, PIK3CD, CD3G, GATA3, CD3E, CD3D, TRBV12-3, TRBC1, PLCG2, HLA-DQA2, HLA-DQA1, HLA-DPA1, HLA-DRB5, TRAT1, THEMIS, FOXP3, PSMB9, ZAP70, CD4, PTPRC, THEMIS2, IFNG, LCK, HLA-DPB1, CD28, HLA-DRA, LCP2, CD247, HLA-DQB2, HLA-DRB1, HLA-DQB1 1112 148 16792 3.3670523041026637 7.0847979791…
GOTERM_BP_DIRECT GO:0007169~transmembrane receptor protein tyrosine kinase signaling pathway 26 1.5169194865810969 2.0046046734765026E-9 BLK, CSF1R, ITK, CSF1, FLT3, CD3E, RASGRP4, STAP1, NTRK1, TRAT1, IL31RA, MATK, PILRA, GFRA2, FGR, HCK, ZAP70, DOK2, CD4, CD8B, LCK, CD7, BTK, CLNK, LCP2, ROR1 1112 96 16792 4.089778177458034 7.304752870473941E-6 1.6987859139879942E-7 1.6442420193840986E-7
GOTERM_BP_DIRECT GO:0032729~positive regulation of interferon-gamma production 18 1.0501750291715286 2.2112691782349372E-9 SASH3, SLC11A1, CD3E, IL2, KLRK1, TNFSF4, KLRC4-KLRK1, HLA-DPB1, LTA, IL12B, CD226, SLAMF6, CD14, IL12RB1, IL18R1, CCR2, HAVCR2, HLA-DPA1 1112 46 16792 5.908977166093212 8.05783239177238E-6 1.8313329285200252E-7 1.7725332708260506E-7
GOTERM_BP_DIRECT GO:0060326~cell chemotaxis 21 1.2252042007001167 3.5318743009782187E-9 CCL25, CCL13, CXCL9, VCAM1, CCL21, CCL4L2, SAA4, C5AR1, FPR1, FPR3, FPR2, CXCL5, CX3CL1, CXCL10, CCL8, CCL5, CCL3, C3AR1, CCL2, SAA2, CCL19 1112 65 16792 4.878693967902601 1.2870067328751844E-5 2.8600333228365843E-7 2.7682045910111507E-7
GOTERM_BP_DIRECT GO:0006952~defense response 21 1.2252042007001167 6.36090229888077E-9 COLEC12, CD74, CD84, CXCL9, CSF3R, CEBPE, SP140, IL31RA, WAS, ACOD1, TAP1, GATA3, LILRA1, LILRB3, LILRA2, CX3CL1, LILRB5, CYSLTR1, CD48, ACKR1, TPSAB1 1112 67 16792 4.733061312144314 2.317885923652785E-5 5.038940864591636E-7 4.877152697424452E-7
GOTERM_BP_DIRECT GO:0030101~natural killer cell activation 12 0.7001166861143524 9.77182351726197E-9 CD2, NCR1, KLRK1, ITGB2, KLRC4-KLRK1, IL21R, IL12B, PIK3CD, SLAMF7, ULBP2, IL2, IL18R1 1112 20 16792 9.06043165467626 3.560789129630759E-5 7.576281892958005E-7 7.333025860719781E-7
GOTERM_BP_DIRECT GO:0002407~dendritic cell chemotaxis 11 0.6417736289381564 1.9581519750462134E-8 CCR1, CXCR1, CCL21, CCL5, GPR183, CXCR4, CCR7, CCL19, CCR5, PIK3CG, CCR2 1112 17 16792 9.7710537452391 7.135251291601197E-5 1.4865637077225837E-6 1.4388337533308323E-6
GOTERM_BP_DIRECT GO:0042130~negative regulation of T cell proliferation 15 0.8751458576429404 4.1102654774794824E-8 IL10, PLA2G2D, HLA-DRB5, LILRB1, LILRB2, FOXP3, SPN, GPNMB, IL2RA, CTLA4, VSIG4, HLA-DRB1, CLEC4G, IDO1, HAVCR2 1112 37 16792 6.121913280186662 1.4976686071710432E-4 3.0566953877418846E-6 2.958552314095946E-6
GOTERM_BP_DIRECT GO:0007157~heterophilic cell-cell adhesion via plasma membrane cell adhesion molecules 17 0.9918319719953326 6.996684829403322E-8 CADM3, GRID2, NLGN1, TENM3, VCAM1, TENM4, CRTAM, ITGAL, SELE, ICAM1, SELP, NCR3, JAML, CD6, CD209, CD226, TIGIT 1112 50 16792 5.134244604316547 2.5492670484361657E-4 5.099183903669141E-6 4.935461478661104E-6
GOTERM_BP_DIRECT GO:0051607~defense response to virus 32 1.8669778296382729 1.1012289896016776E-7 CD86, CXCL9, CD40, PRF1, IFIT1, DDX60, IFI44L, IFIT3, IFIT2, IFI16, ITGAX, IL12B, GBP1, TRIM22, APOBEC3D, APOBEC3G, RSAD2, STAT1, APOBEC3H, LILRB1, BST2, CXCL10, IL6, SLFN11, PTPRC, IFNG, OAS2, IRF1, BCL2, TLR8, TLR7, APOBEC3A 1112 165 16792 2.92862437322869 4.012073605200728E-4 7.868389094330418E-6 …
GOTERM_BP_DIRECT GO:0032760~positive regulation of tumor necrosis factor production 16 0.9334889148191364 1.8681934025948334E-7 SASH3, FCER1G, PTAFR, LY96, RASGRP1, CD2, IFNG, LEP, CCL3, IL12B, CCL2, CD14, CD36, CCL19, JAK2, TLR2 1112 47 16792 5.140670442369509 6.80538068207337E-4 1.3091724536645333E-5 1.2671381021061496E-5
GOTERM_BP_DIRECT GO:0001816~cytokine production 12 0.7001166861143524 1.9050989885522514E-7 ITK, CD4, FABP4, MAF, PTAFR, PIK3CD, CD226, DBH, RASGRP1, FOXP3, S100A8, PIK3CG 1112 25 16792 7.248345323741008 6.939772239011877E-4 1.3098454177895102E-5 1.2677894589856209E-5
GOTERM_BP_DIRECT GO:0019882~antigen processing and presentation 17 0.9918319719953326 3.08626612096646E-7 CD74, RAB3C, HLA-DRB5, HLA-DRB9, RAB33A, HLA-DMB, IFNG, CTSL, CD209, HLA-DPB1, HLA-DRA, ULBP2, HLA-DQA2, HLA-DQA1, HLA-DRB1, HLA-DPA1, HLA-DQB1 1112 55 16792 4.667495094833225 0.0011240033822860207 2.0826581008892185E-5 2.0157890016016117E-5
GOTERM_BP_DIRECT GO:0045954~positive regulation of natural killer cell mediated cytotoxicity 10 0.5834305717619603 6.631874955869116E-7 IL21, NCR3, LAG3, KLRK1, SH2D1A, KLRC4-KLRK1, CRTAM, SLAMF6, CD226, RASGRP1 1112 18 16792 8.389288569144684 0.002413738272951438 4.384176962188762E-5 4.243411675532317E-5
GOTERM_BP_DIRECT GO:0009615~response to virus 24 1.4002333722287048 6.737483805778559E-7 BATF3, CCL22, RSAD2, CXCR4, LILRB1, GATA3, IFIT1, DDX60, FOXP3, IFIT3, DCLK1, IFIT2, BST2, FGR, CCL8, IFNG, OAS2, CCL5, TBX21, TNFSF4, CCL4, TLR8, CCL19, TRIM22 1112 110 16792 3.2947024198822765 0.0024521285346664756 4.384176962188762E-5 4.243411675532317E-5
GOTERM_BP_DIRECT GO:0032689~negative regulation of interferon-gamma production 12 0.7001166861143524 7.630264417343363E-7 IL10, CD96, CD274, HLA-DRB5, PGLYRP2, TNFSF4, LILRB1, GATA3, PDCD1LG2, FOXP3, HLA-DRB1, HAVCR2 1112 28 16792 6.471736896197329 0.0027766074893980086 4.878014655578809E-5 4.721393438591235E-5
GOTERM_BP_DIRECT GO:0042113~B cell activation 12 0.7001166861143524 1.1559863807102057E-6 BST2, CD86, CD79A, ZAP70, CD40, BANK1, PRKCB, CXCR5, BTK, PIK3CD, LAX1, IKZF3 1112 29 16792 6.248573554949145 0.0042035570231856445 7.26278339880688E-5 7.029593042698096E-5
GOTERM_BP_DIRECT GO:0030217~T cell differentiation 12 0.7001166861143524 1.7164092863807665E-6 ZAP70, CD4, PTPRC, LCK, LEP, TBX21, PIK3CD, RHOH, IL7R, CD3D, IL2, GPR18 1112 30 16792 6.040287769784173 0.006235081507967033 1.0601009219612734E-4 1.0260636530618583E-4
GOTERM_BP_DIRECT GO:0030890~positive regulation of B cell proliferation 13 0.7584597432905484 4.8715215061494875E-6 SASH3, IL21, CD74, CD40, IL13, TNFRSF13C, IL2, TNFSF13B, PTPRC, GPR183, BCL2, CD38, NCKAP1L 1112 39 16792 5.03357314148681 0.017595231437129932 2.9586373947347887E-4 2.8636427253648735E-4
GOTERM_BP_DIRECT GO:0007186~G-protein coupled receptor signaling pathway 95 5.542590431738623 5.609378619407062E-6 GPR27, FCN1, GPR25, CXCL9, CXCL8, GPR68, GPR65, CCL4L2, CD3E, CXCL13, OR52N4, PIK3CG, CXCL5, CX3CL1, GPR174, ADGRE1, ADGRE2, GNGT2, RGS1, ADGRE3, GPR171, ENPP2, C3AR1, PROK2, FFAR3, CCR8, FFAR2, CCR7, JAK2, CCR5, CCR4, ADGRE4P, CCR2, CMKLR1, PTGDR, GPR31, TAAR1, PDGFRL, SFRP1, SFRP2,…
GOTERM_BP_DIRECT GO:0046641~positive regulation of alpha-beta T cell proliferation 7 0.40840140023337224 5.846380556578114E-6 ZAP70, TNFSF4, CD80, EBI3, CD28, CD3E, CCR2 1112 9 16792 11.74500399680256 0.021078940022188797 3.4361630238984915E-4 3.3258361650082273E-4
GOTERM_BP_DIRECT GO:0008544~epidermis development 19 1.1085180863477246 8.954645538518042E-6 SPRR2E, SPRR2F, SPRR3, SPRR2G, BNC1, KRT2, WAS, KRT5, KRT9, LCE3D, FGF7, KRT17, KRT16, GJB5, KRT14, SPRR2A, SPRR1A, SPRR1B, SPRR2D 1112 85 16792 3.3754549301735084 0.03210423127636475 5.179480689263452E-4 5.013180129262402E-4
GOTERM_BP_DIRECT GO:0042832~defense response to protozoan 9 0.5250875145857643 1.4015998750443943E-5 IL10, IL6, CD40, IFNG, CLEC7A, IRF4, SLC11A1, IL12B, TSPAN32 1112 19 16792 7.152972358954941 0.04979227213367188 7.98035928853402E-4 7.724129311377466E-4
GOTERM_BP_DIRECT GO:0032735~positive regulation of interleukin-12 production 10 0.5834305717619603 1.8252181468007685E-5 CD40, CD40LG, IFNG, TNFSF4, IL12B, CCR7, CD36, CCL19, IDO1, TLR2 1112 25 16792 6.040287769784173 0.06434789684675657 0.0010232453733756924 9.903914467332786E-4
GOTERM_BP_DIRECT GO:0045060~negative thymic T cell selection 7 0.40840140023337224 2.8643320711954667E-5 SPN, CD74, ZAP70, CD28, CCR7, DOCK2, CD3E 1112 11 16792 9.609548724656639 0.09911508113752532 0.0015814584950661031 0.001530681699258547
GOTERM_BP_DIRECT GO:0090026~positive regulation of monocyte chemotaxis 8 0.4667444574095682 3.666428763585458E-5 CCR1, CXCL10, CCL5, SERPINE1, CCL2, PLA2G7, AIF1, CCR2 1112 16 16792 7.550359712230216 0.12506625322677278 0.0019940994648515536 0.0019300737685322255
GOTERM_BP_DIRECT GO:0050728~negative regulation of inflammatory response 17 0.9918319719953326 4.970019508222111E-5 PTGIS, TNFAIP6, SERPINF1, KRT1, ADIPOQ, NR1H4, ACOD1, GATA3, MEFV, IL2, IL22RA2, CNR2, IL2RA, SAA1, ACP5, TNFAIP8L2, APOE 1112 79 16792 3.249521901466169 0.1656581024826872 0.0026633457482296134 0.0025778321772793214
GOTERM_BP_DIRECT GO:0045471~response to ethanol 20 1.1668611435239207 5.2924040167867205E-5 NTRK1, ADCYAP1R1, VCAM1, IL13, ADIPOQ, GATA3, IL2, ICAM1, NPPC, ADCYAP1, GRIN3A, CNR1, LEP, PENK, CD27, CCL2, CD14, CDO1, HAMP, S100A8 1112 105 16792 2.876327509421034 0.17540284254032068 0.0027950029329233054 0.0027052621691604005
GOTERM_BP_DIRECT GO:0032695~negative regulation of interleukin-12 production 7 0.40840140023337224 5.40740237714002E-5 IL10, ACP5, MEFV, TIGIT, JAK3, CMKLR1, SLAMF1 1112 12 16792 8.808752997601918 0.17885130410400374 0.002814939180328319 0.0027245583120246927
GOTERM_BP_DIRECT GO:0010818~T cell chemotaxis 6 0.3500583430571762 5.944853267874511E-5 CXCL10, CXCL11, GPR183, CCL3, PIK3CD, PIK3CG 1112 8 16792 11.325539568345325 0.19477770153014717 0.0030511331419908055 0.0029531686585624506
GOTERM_BP_DIRECT GO:0050731~positive regulation of peptidyl-tyrosine phosphorylation 17 0.9918319719953326 7.975508657407464E-5 CD74, CD80, ADIPOQ, OSM, TREM2, CCK, IGF1, CD3E, ICAM1, FGF7, IL6, CD4, ENPP2, CNTN1, HCLS1, CD36, JAK2 1112 82 16792 3.130636953851553 0.2522145140329284 0.004036493548276778 0.0039068915325939065
GOTERM_BP_DIRECT GO:0033209~tumor necrosis factor-mediated signaling pathway 21 1.2252042007001167 8.871207834394663E-5 NGFR, CD40, TNFSF14, TNFRSF13B, STAT1, TNFRSF18, TNFRSF9, FASLG, TNFRSF13C, PSMB9, TNFSF13B, AIM2, CD40LG, TNFSF4, LTA, TNFRSF17, CD27, TNFRSF8, LTB, JAK2, BIRC3 1112 118 16792 2.687416168759907 0.27622966456403863 0.0044283125134978295 0.004286130141357531
GOTERM_BP_DIRECT GO:0045730~respiratory burst 7 0.40840140023337224 9.479865552254549E-5 CD52, NCF1, NCF2, SLC11A1, NCF1B, CYBB, NCF1C 1112 13 16792 8.131156613171001 0.29210724707459723 0.004668193253029132 0.004518308892270512
GOTERM_BP_DIRECT GO:0043547~positive regulation of GTPase activity 62 3.6172695449241536 1.0466396147028437E-4 ARHGAP9, CD40, CSF2, DOCK8, CCL4L2, IL5RA, FGF2, CX3CL1, ICAM1, DOCK10, RGS4, FGF7, RGS1, TAGAP, JAK2, RGS8, JAK3, GFRA2, ADCYAP1, SFRP1, ACAP1, ADGRB3, XCL2, DOCK2, ARHGEF6, RGS18, SPTBN4, CCL13, CCL3L3, CSF2RB, RASAL3, ARHGAP15, RASGRP2, RASGRP1, RASGRP4, FGD2, SPTA1, ARHGAP20, CCL8, C…
GOTERM_BP_DIRECT GO:0045765~regulation of angiogenesis 10 0.5834305717619603 1.2552958121874805E-4 IL6, SFRP1, GPNMB, LEP, KRT1, ENPP2, PROK2, CXCL13, FGF2, PROK1 1112 31 16792 4.8711998143420745 0.3671099109137419 0.006018813078435762 0.005825563591559531
GOTERM_BP_DIRECT GO:0032720~negative regulation of tumor necrosis factor production 11 0.6417736289381564 1.3239291970323415E-4 IL10, ORM1, GPNMB, ADIPOQ, CIDEA, ACP5, NLRC3, FOXP3, GPR18, HAVCR2, SLAMF1 1112 38 16792 4.371260886028019 0.3827441899635595 0.0062654519402413665 0.0060642834778351536
GOTERM_BP_DIRECT GO:0019221~cytokine-mediated signaling pathway 22 1.2835472578763127 1.3624212447407267E-4 CCR1, CSF1R, CSF3R, FLT3, IL10RA, EBI3, IL31RA, DCN, CX3CL1, IL22RA2, HCK, IL6, IL17REL, IL1RAPL2, IL2RB, STAT4, IL12B, CCL2, JAK2, IL12RB1, LRRC4C, CCR2 1112 131 16792 2.535998681970454 0.3913428393980818 0.006364952584404112 0.006160589397693004
GOTERM_BP_DIRECT GO:0050715~positive regulation of cytokine secretion 9 0.5250875145857643 1.4031603725302415E-4 IL10, FGR, CLEC6A, CLEC5A, CRTAM, SAA1, CD14, CLEC9A, CLEC4E 1112 25 16792 5.436258992805755 0.40031305347389345 0.0063913954968752495 0.0061861832923927025
GOTERM_BP_DIRECT GO:0007159~leukocyte cell-cell adhesion 9 0.5250875145857643 1.4031603725302415E-4 SELP, VCAM1, CD40LG, CD209, CCL5, ITGB2, ITGAL, SELE, ICAM1 1112 25 16792 5.436258992805755 0.40031305347389345 0.0063913954968752495 0.0061861832923927025
GOTERM_BP_DIRECT GO:0006928~movement of cell or subcellular component 17 0.9918319719953326 1.4393136260339276E-4 CXCL8, IL13, CXCR5, FPR3, LSP1, FPR2, IGF1, ITGAL, PTGS2, LYVE1, VNN1, IFNG, VNN2, ABI3, CCL4, ENPP2, JAK2 1112 86 16792 2.9850259327421784 0.40816277160092596 0.006475134386750163 0.006267233529656373
GOTERM_BP_DIRECT GO:0035589~G-protein coupled purinergic nucleotide receptor signaling pathway 7 0.40840140023337224 1.5661798634309401E-4 P2RY12, P2RY8, P2RY13, P2RY10, GPR87, GPR171, PTAFR 1112 14 16792 7.5503597122302155 0.434904558499693 0.006959950515051641 0.006736483388196252
GOTERM_BP_DIRECT GO:0007498~mesoderm development 10 0.5834305717619603 1.6447616267290446E-4 TBX1, HES7, HCK, LHX2, MATK, BTK, SECTM1, IKZF1, JAK2, IKZF3 1112 32 16792 4.718974820143885 0.45085921516769734 0.007221098033494745 0.006989246093341373
GOTERM_BP_DIRECT GO:0045766~positive regulation of angiogenesis 20 1.1668611435239207 1.8652896113561802E-4 NTRK1, CCBE1, PTGIS, CXCL8, PRKCB, CMA1, SPHK1, ITGB2, C5AR1, SERPINE1, CYBB, FGF2, PIK3R6, CX3CL1, C3, GREM1, CYSLTR2, SFRP2, C3AR1, CYP1B1 1112 115 16792 2.6262120738192056 0.4932689731530022 0.008091803980692763 0.007831995784825295
GOTERM_BP_DIRECT GO:0032753~positive regulation of interleukin-4 production 8 0.4667444574095682 1.964896173414907E-4 SASH3, CD40LG, TNFSF4, CD28, GATA3, CD3E, FOXP3, HAVCR2 1112 20 16792 6.040287769784173 0.5113352067262941 0.008423625477557553 0.008153163298393384
GOTERM_BP_DIRECT GO:0002755~MyD88-dependent toll-like receptor signaling pathway 10 0.5834305717619603 2.1299052802324078E-4 TLR1, BTK, LY96, TLR8, TLR10, TLR7, CD14, CD36, TLR6, TLR2 1112 33 16792 4.575975583169827 0.5398580042967493 0.009024854466473133 0.008735088282999653
GOTERM_BP_DIRECT GO:0031424~keratinization 12 0.7001166861143524 2.360384518056194E-4 SPRR2E, SPRR2F, SPRR3, LCE3D, SPRR2G, KRT17, KRT16, KRT2, SPRR2A, SPRR1A, SPRR1B, SPRR2D 1112 48 16792 3.775179856115108 0.5769333915463337 0.009681225498091377 0.009370384833086796
GOTERM_BP_DIRECT GO:0002430~complement receptor mediated signaling pathway 6 0.3500583430571762 2.3910820384967727E-4 CR2, CR1, FPR1, C3AR1, FPR3, FPR2 1112 10 16792 9.06043165467626 0.5816406304930977 0.009681225498091377 0.009370384833086796
GOTERM_BP_DIRECT GO:0001771~immunological synapse formation 6 0.3500583430571762 2.3910820384967727E-4 CD6, CCL21, DOCK8, PRF1, CCL19, DOCK2 1112 10 16792 9.06043165467626 0.5816406304930977 0.009681225498091377 0.009370384833086796
GOTERM_BP_DIRECT GO:0002377~immunoglobulin production 6 0.3500583430571762 2.3910820384967727E-4 VPREB3, VPREB1, IGKV1-5, IGKV4-1, IL7R, ITM2A 1112 10 16792 9.06043165467626 0.5816406304930977 0.009681225498091377 0.009370384833086796
GOTERM_BP_DIRECT GO:0042104~positive regulation of activated T cell proliferation 9 0.5250875145857643 2.5578918125845754E-4 CD86, IL2RA, TNFSF4, TNFSF9, IL12B, IGF1, IL12RB1, IL2, SLAMF1 1112 27 16792 5.033573141486811 0.6063192616215615 0.010242810730833178 0.009913938926358019
GOTERM_BP_DIRECT GO:0042346~positive regulation of NF-kappaB import into nucleus 8 0.4667444574095682 2.77988419543919E-4 GREM1, SPHK1, IL12B, TLR7, CCL19, PTGS2, IL18R1, TLR2 1112 21 16792 5.752655018842069 0.6369194711048252 0.011010758704543922 0.0106572299536022
GOTERM_BP_DIRECT GO:0051384~response to glucocorticoid 14 0.8168028004667445 2.825705077308965E-4 IL10, PTPRU, IL1RN, WNT7B, ADIPOQ, S100B, PTGS2, AIF1, IL6, BCL2, ALPL, CCL1, PTGDS, CDO1 1112 65 16792 3.252462645268401 0.6429332133192545 0.011071902474961148 0.010716410545880344
GOTERM_BP_DIRECT GO:0019886~antigen processing and presentation of exogenous peptide antigen via MHC class II 17 0.9918319719953326 3.231090728888593E-4 CD74, HLA-DRB5, FCER1G, IFI30, HLA-DMA, HLA-DMB, CTSL, HLA-DPB1, HLA-DRA, HLA-DOA, HLA-DOB, HLA-DQA2, HLA-DQA1, HLA-DQB2, HLA-DRB1, HLA-DPA1, HLA-DQB1 1112 92 16792 2.790350328432906 0.6919828200268388 0.01252563257028727 0.012123464894457519
GOTERM_BP_DIRECT GO:0030183~B cell differentiation 14 0.8168028004667445 3.3089160653234056E-4 IL10, NTRK1, CR2, VCAM1, FLT3, NFAM1, AICDA, TSHR, CD79B, ADGRG3, CD79A, CD40LG, PLCG2, JAK3 1112 66 16792 3.203182908218879 0.7005981259439853 0.012692305412672095 0.01228478627620595
GOTERM_BP_DIRECT GO:0071345~cellular response to cytokine stimulus 8 0.4667444574095682 3.845758876481165E-4 CD86, CSF1R, IL18RAP, FLT3, IL13, HCLS1, CXCR4, CCR7 1112 22 16792 5.491170699803794 0.7538130506519168 0.014447366335976665 0.013983496450875328
GOTERM_BP_DIRECT GO:0090023~positive regulation of neutrophil chemotaxis 8 0.4667444574095682 3.845758876481165E-4 CD74, CXCL8, CCL21, C5AR1, C3AR1, CCR7, NCKAP1L, CCL19 1112 22 16792 5.491170699803794 0.7538130506519168 0.014447366335976665 0.013983496450875328
GOTERM_BP_DIRECT GO:0010759~positive regulation of macrophage chemotaxis 6 0.3500583430571762 4.144956064503482E-4 CSF1, CCL5, C5AR1, C3AR1, CCL2, CMKLR1 1112 11 16792 8.236756049705692 0.7792523550750186 0.0154124692847456 0.01491761228520794
GOTERM_BP_DIRECT GO:0002376~immune system process 9 0.5250875145857643 4.392857868029956E-4 FCMR, CD300A, CD5L, VSTM1, CD300C, CD300LF, IDO2, CD300LG, IDO1 1112 29 16792 4.686430166211858 0.7983272823310614 0.01616926673848602 0.015650110808627934
GOTERM_BP_DIRECT GO:0032733~positive regulation of interleukin-10 production 8 0.4667444574095682 5.214854883708821E-4 SASH3, CD40LG, FCER1G, TNFSF4, CD28, IL12B, TIGIT, TLR2 1112 23 16792 5.252424147638411 0.850549310935429 0.019002931196234942 0.01839279317484101
GOTERM_BP_DIRECT GO:0007568~aging 24 1.4002333722287048 5.502452416925525E-4 IL10, CD86, NTRK1, CIITA, VCAM1, SLC32A1, BCL2A1, SERPINF1, ITGB2, NPY2R, PAX5, RETN, FGF2, DCN, IL6, ADRB3, CNR1, KRT16, GJB6, KRT14, PENK, SERPING1, CCL2, HAMP 1112 165 16792 2.1964682799215174 0.865426600795056 0.019852412482452092 0.019214999677719134
GOTERM_BP_DIRECT GO:0019441~tryptophan catabolic process to kynurenine 5 0.29171528588098017 5.67385818820148E-4 TDO2, KYNU, KMO, IDO2, IDO1 1112 7 16792 10.78622816032888 0.8735793823346216 0.020073339065831256 0.01942883284445303
GOTERM_BP_DIRECT GO:0002606~positive regulation of dendritic cell antigen processing and presentation 5 0.29171528588098017 5.67385818820148E-4 CD74, CCL21, SLC11A1, CCR7, CCL19 1112 7 16792 10.78622816032888 0.8735793823346216 0.020073339065831256 0.01942883284445303
GOTERM_BP_DIRECT GO:0030595~leukocyte chemotaxis 6 0.3500583430571762 6.71939594088638E-4 IL10, CNR2, GPR183, CXCR5, IL16, CX3CL1 1112 12 16792 7.550359712230216 0.9136521080626052 0.022463742026229326 0.021742485764684644
GOTERM_BP_DIRECT GO:0045078~positive regulation of interferon-gamma biosynthetic process 6 0.3500583430571762 6.71939594088638E-4 IL21, EBI3, IL12B, TLR8, TLR7, TNFRSF13C 1112 12 16792 7.550359712230216 0.9136521080626052 0.022463742026229326 0.021742485764684644
GOTERM_BP_DIRECT GO:0032693~negative regulation of interleukin-10 production 6 0.3500583430571762 6.71939594088638E-4 CD274, IL12B, PDCD1LG2, JAK3, FOXP3, IDO1 1112 12 16792 7.550359712230216 0.9136521080626052 0.022463742026229326 0.021742485764684644
GOTERM_BP_DIRECT GO:0042088~T-helper 1 type immune response 6 0.3500583430571762 6.71939594088638E-4 HLA-DRB5, EBI3, IL12B, TLR6, HLA-DRB1, IL18BP 1112 12 16792 7.550359712230216 0.9136521080626052 0.022463742026229326 0.021742485764684644
GOTERM_BP_DIRECT GO:0045086~positive regulation of interleukin-2 biosynthetic process 6 0.3500583430571762 6.71939594088638E-4 CD86, CD4, IRF4, CD80, CD28, CD3E 1112 12 16792 7.550359712230216 0.9136521080626052 0.022463742026229326 0.021742485764684644
GOTERM_BP_DIRECT GO:0001774~microglial cell activation 6 0.3500583430571762 6.71939594088638E-4 IL13, TLR8, TLR7, TLR6, AIF1, TLR2 1112 12 16792 7.550359712230216 0.9136521080626052 0.022463742026229326 0.021742485764684644
GOTERM_BP_DIRECT GO:0097190~apoptotic signaling pathway 14 0.8168028004667445 6.916288081975391E-4 NGFR, CD40, PTGIS, DAPK1, LY96, FASLG, CD3E, P2RX7, SPN, CD28, BTK, TNFRSF8, CD38, CD14 1112 71 16792 2.977606647076705 0.9196342616531902 0.022911776155198474 0.022176134604661092
GOTERM_BP_DIRECT GO:0034142~toll-like receptor 4 signaling pathway 7 0.40840140023337224 7.69668171773698E-4 ITGAM, TNIP3, ITGB2, NR1H4, LY96, CD14, PIK3AP1 1112 18 16792 5.87250199840128 0.9395386345185578 0.0250417037316371 0.024237675373623504
GOTERM_BP_DIRECT GO:0001782~B cell homeostasis 7 0.40840140023337224 7.69668171773698E-4 TNFRSF13B, BCL2, NCKAP1L, TNFRSF13C, FOXP3, TNFSF13B, GAPT 1112 18 16792 5.87250199840128 0.9395386345185578 0.0250417037316371 0.024237675373623504
GOTERM_BP_DIRECT GO:0042100~B cell proliferation 9 0.5250875145857643 9.016482055646949E-4 IL10, CD79A, CR2, CD40, PTPRC, CD40LG, BCL2, IL7R, MS4A1 1112 32 16792 4.247077338129497 0.9626375161061729 0.028821105798927615 0.027895730009005956
GOTERM_BP_DIRECT GO:0031663~lipopolysaccharide-mediated signaling pathway 9 0.5250875145857643 9.016482055646949E-4 HCK, CD6, CCL5, PTAFR, CCL3, CCL2, LY96, CD14, TLR2 1112 32 16792 4.247077338129497 0.9626375161061729 0.028821105798927615 0.027895730009005956
GOTERM_BP_DIRECT GO:0038083~peptidyl-tyrosine autophosphorylation 10 0.5834305717619603 9.937115946228906E-4 BLK, FGR, ITK, HCK, ZAP70, LCK, MATK, BTK, JAK2, JAK3 1112 40 16792 3.7751798561151078 0.9732944908776763 0.031487696093963596 0.030476702558564654
GOTERM_BP_DIRECT GO:0014068~positive regulation of phosphatidylinositol 3-kinase signaling 13 0.7584597432905484 0.001018027304563018 FLT3, IGF1, DCN, SELP, FGR, CCL5, LEP, CD28, HCLS1, PIK3AP1, JAK2, HCST, NKX3-1 1112 65 16792 3.0201438848920863 0.9755611466806897 0.03198009911920377 0.030953295717187624
GOTERM_BP_DIRECT GO:0043011~myeloid dendritic cell differentiation 7 0.40840140023337224 0.0010623977959967085 CD86, DCSTAMP, BATF3, SPI1, CSF2, IRF4, UBD 1112 19 16792 5.563422945853843 0.9792131665059082 0.0325406167803182 0.031495816515966606
GOTERM_BP_DIRECT GO:0045576~mast cell activation 5 0.29171528588098017 0.0010753231049937962 FCER1G, S100A12, RHOH, LCP2, CD48 1112 8 16792 9.43794964028777 0.9801705231946231 0.0325406167803182 0.031495816515966606
GOTERM_BP_DIRECT GO:0048304~positive regulation of isotype switching to IgG isotypes 5 0.29171528588098017 0.0010753231049937962 CD40, IFNG, TBX21, CD28, IL2 1112 8 16792 9.43794964028777 0.9801705231946231 0.0325406167803182 0.031495816515966606
GOTERM_BP_DIRECT GO:0072672~neutrophil extravasation 4 0.2333722287047841 0.0010983797650875793 JAML, PIK3CD, TREM1, PIK3CG 1112 4 16792 15.100719424460433 0.981770162516732 0.0325406167803182 0.031495816515966606
GOTERM_BP_DIRECT GO:0033004~negative regulation of mast cell activation 4 0.2333722287047841 0.0010983797650875793 MILR1, CD84, CNR2, CNR1 1112 4 16792 15.100719424460433 0.981770162516732 0.0325406167803182 0.031495816515966606
GOTERM_BP_DIRECT GO:0038124~toll-like receptor TLR6:TLR2 signaling pathway 4 0.2333722287047841 0.0010983797650875793 CD14, CD36, TLR6, TLR2 1112 4 16792 15.100719424460433 0.981770162516732 0.0325406167803182 0.031495816515966606
GOTERM_BP_DIRECT GO:0071726~cellular response to diacyl bacterial lipopeptide 4 0.2333722287047841 0.0010983797650875793 CD14, CD36, TLR6, TLR2 1112 4 16792 15.100719424460433 0.981770162516732 0.0325406167803182 0.031495816515966606
GOTERM_BP_DIRECT GO:0050850~positive regulation of calcium-mediated signaling 7 0.40840140023337224 0.0014335013011438562 ZAP70, CD4, TRAT1, CCL4, CCL3, TREM2, CD3E 1112 20 16792 5.285251798561151 0.9946326791117501 0.04212644146264687 0.04077386362205146
GOTERM_BP_DIRECT GO:0043029~T cell homeostasis 8 0.4667444574095682 0.001496667008316064 P2RX7, GPR174, TNFSF14, SIT1, BCL2, NCKAP1L, JAK3, FOXP3 1112 27 16792 4.474287236877165 0.9957376727166198 0.04363083662642989 0.04222995630664606
GOTERM_BP_DIRECT GO:0006569~tryptophan catabolic process 5 0.29171528588098017 0.0018344206107269226 TDO2, KYNU, KMO, IDO2, IDO1 1112 9 16792 8.389288569144684 0.9987576709864372 0.052634871696763036 0.050944893653809886
GOTERM_BP_DIRECT GO:0070234~positive regulation of T cell apoptotic process 5 0.29171528588098017 0.0018344206107269226 CCL5, LGALS17A, PDCD1, IDO1, ICAM1 1112 9 16792 8.389288569144684 0.9987576709864372 0.052634871696763036 0.050944893653809886
GOTERM_BP_DIRECT GO:0032715~negative regulation of interleukin-6 production 8 0.4667444574095682 0.0018830550717215345 IL10, ORM1, NR1H4, NLRC3, NCKAP1L, FOXP3, HAVCR2, SLAMF1 1112 28 16792 4.3144912641315525 0.9989597783115195 0.0534215129466713 0.05170627776150101
GOTERM_BP_DIRECT GO:0019835~cytolysis 7 0.40840140023337224 0.0018957064537125589 P2RX7, GZMM, C7, GZMA, PRF1, APOL1, GZMH 1112 21 16792 5.03357314148681 0.9990067322878882 0.0534215129466713 0.05170627776150101
GOTERM_BP_DIRECT GO:0019233~sensory perception of pain 11 0.6417736289381564 0.001905816872411435 P2RX7, ADCYAP1, CNR2, KCND2, CNR1, PENK, OPRL1, PROK2, IL12B, PTGS2, ALOXE3 1112 52 16792 3.1943829551743215 0.9990427278786516 0.0534215129466713 0.05170627776150101
GOTERM_BP_DIRECT GO:0002437~inflammatory response to antigenic stimulus 6 0.3500583430571762 0.002155783901664054 CYSLTR1, HLA-DRB5, IL2RA, IL5RA, RASGRP1, HLA-DRB1 1112 15 16792 6.040287769784173 0.9996157266068542 0.059250247881343095 0.0573478661573812
GOTERM_BP_DIRECT GO:0045582~positive regulation of T cell differentiation 6 0.3500583430571762 0.002155783901664054 CD74, ZAP70, IL2RA, CD27, GATA3, PIK3R6 1112 15 16792 6.040287769784173 0.9996157266068542 0.059250247881343095 0.0573478661573812
GOTERM_BP_DIRECT GO:0046718~viral entry into host cell 14 0.8168028004667445 0.0021625364896318967 SERPINB3, CD86, CR2, CR1, SELPLG, CD80, ICAM1, CD209, LAMP3, MRC1, CLEC5A, ITGB7, CLEC4G, SLAMF1 1112 80 16792 2.6426258992805756 0.9996250867800073 0.059250247881343095 0.0573478661573812
GOTERM_BP_DIRECT GO:0008360~regulation of cell shape 20 1.1668611435239207 0.0022013095996692234 CCL13, CSF1R, WIPF1, LST1, ITGB2, ARHGAP15, S100B, SYNE3, ERMN, FGD2, ICAM1, SPTA1, FGR, HCK, FMNL1, IL6, CCL7, EPB41L3, CCL3, CCL2 1112 140 16792 2.1572456320657762 0.999674586586166 0.05986247896413918 0.057940439985323514
GOTERM_BP_DIRECT GO:0072540~T-helper 17 cell lineage commitment 4 0.2333722287047841 0.0026104994756023818 IL6, IRF4, SLAMF6, LY9 1112 5 16792 12.080575539568345 0.9999270034324105 0.0694354751028838 0.06720607044123796
GOTERM_BP_DIRECT GO:0002503~peptide antigen assembly with MHC class II protein complex 4 0.2333722287047841 0.0026104994756023818 HLA-DMA, HLA-DMB, HLA-DRA, HLA-DRB1 1112 5 16792 12.080575539568345 0.9999270034324105 0.0694354751028838 0.06720607044123796
GOTERM_BP_DIRECT GO:0002381~immunoglobulin production involved in immunoglobulin mediated immune response 4 0.2333722287047841 0.0026104994756023818 HLA-DRB5, HLA-DRB1, GAPT, HLA-DQB1 1112 5 16792 12.080575539568345 0.9999270034324105 0.0694354751028838 0.06720607044123796
GOTERM_BP_DIRECT GO:0006915~apoptotic process 56 3.267211201866978 0.0027628574868519247 NCF1, GPR65, ITGB2, PRF1, FASLG, COMP, RASSF5, PEG10, JAK2, TP63, ZNF385A, UNC5A, PRKCB, DAPK1, GREM1, TIAM1, SFRP2, AIM2, IFNG, IRF1, MZB1, LTA, MAL, S100A8, TLR2, BIRC3, ARHGEF6, PDE1B, CD5L, C5AR1, CXCR4, EPB41L3, CD14, NLRP1, TNFSF14, STAT1, TNFRSF9, ZBTB16, GZMA, LY86, CIDEA, CIDEB, GDF6, ALOX15B, GZMH, …
GOTERM_BP_DIRECT GO:0007187~G-protein coupled receptor signaling pathway, coupled to cyclic nucleotide second messenger 10 0.5834305717619603 0.0028023973491511207 CCR1, HTR7, XCR1, CNR2, ADRB3, CNR1, HRH2, CCL2, SSTR3, TSHR 1112 46 16792 3.282765092274007 0.9999637934921575 0.07346716503817759 0.07110831259320866
GOTERM_BP_DIRECT GO:0030449~regulation of complement activation 8 0.4667444574095682 0.002883508878374204 C3, C4A, CR1, CFH, C7, C5AR1, C3AR1, CFP 1112 30 16792 4.026858513189449 0.9999730811771494 0.07505361680568286 0.07264382724304155
GOTERM_BP_DIRECT GO:0044130~negative regulation of growth of symbiont in host 6 0.3500583430571762 0.0029664500713699055 IL10, IFNG, LTA, IL12B, CTSG, CD36 1112 16 16792 5.662769784172663 0.999980120253767 0.07666485148987189 0.07420332909022452
GOTERM_BP_DIRECT GO:0006874~cellular calcium ion homeostasis 15 0.8751458576429404 0.003106187735148395 CCR1, CCL13, CCL23, CD40, PRKCB, CCL8, CCL7, CCL5, CCL3, CCL2, CCL1, CCL19, APOE, CCR2, DRD5 1112 93 16792 2.4355999071710372 0.9999880713081982 0.07971090216113205 0.07715157846386189
GOTERM_BP_DIRECT GO:0006953~acute-phase response 9 0.5250875145857643 0.0034945823984955772 IL6, CD163, IL1RN, ORM1, SAA4, SAA1, SAA2, SAA2-SAA4, HAMP 1112 39 16792 3.484781405644715 0.9999971166584937 0.08905075706376142 0.08619155328317413
GOTERM_BP_DIRECT GO:0034341~response to interferon-gamma 7 0.40840140023337224 0.003965029099061889 BST2, CD86, CIITA, UBD, SLC11A1, KYNU, MEFV 1112 24 16792 4.404376498800959 0.9999994840657349 0.09923855009519479 0.09605224099499232
GOTERM_BP_DIRECT GO:0042523~positive regulation of tyrosine phosphorylation of Stat5 protein 6 0.3500583430571762 0.003976078022474874 CSF2, IL31RA, IL12B, IGF1, JAK2, IL2 1112 17 16792 5.329665679221328 0.9999995045053351 0.09923855009519479 0.09605224099499232
GOTERM_BP_DIRECT GO:0032722~positive regulation of chemokine production 6 0.3500583430571762 0.003976078022474874 IL6, FFAR3, FFAR2, TLR7, HAVCR2, TLR2 1112 17 16792 5.329665679221328 0.9999995045053351 0.09923855009519479 0.09605224099499232
GOTERM_BP_DIRECT GO:0006816~calcium ion transport 13 0.7584597432905484 0.004019897879932248 CCR1, PRKCB, CACNG6, CYSLTR1, CCL8, GRIN3A, TRPV6, CCL5, TRPV5, CCL3, NMUR2, CCR5, RAMP1 1112 76 16792 2.5830177962892846 0.9999995779026113 0.0996497134317899 0.09645020287429279
GOTERM_BP_DIRECT GO:0001895~retina homeostasis 9 0.5250875145857643 0.004119800099603818 IGHG3, IGKC, KRT1, AIPL1, IGHA1, IGHA2, RPE65, JCHAIN, LTF 1112 40 16792 3.397661870503597 0.9999997071370593 0.10084270098437778 0.09760488649064226
GOTERM_BP_DIRECT GO:0046677~response to antibiotic 8 0.4667444574095682 0.004247127242055945 IL6, CIITA, ADRB3, ALPL, CCL2, SLC1A3, JAK2, CCR4 1112 32 16792 3.775179856115108 0.9999998162133794 0.10084270098437778 0.09760488649064226
GOTERM_BP_DIRECT GO:0008284~positive regulation of cell proliferation 47 2.7421236872812136 0.004258128886772314 CD86, IL21, CSF1R, CSF2, CSF1, BNC1, FLT3, SIRPG, FASLG, FGF2, HOXC10, CXCL5, TNFSF13B, FGF7, PROK2, WNT1, PROK1, KRT6A, NKX3-1, SLAMF1, SERPINB3, TBX1, WNT10B, OSM, IL31RA, MATK, CCK, IGF1, S100B, TSHR, IL2, GREM1, TIAM1, CXCL10, HCK, ADCYAP1, SFRP1, IL6, SFRP2, IFNG, LEP, TNFSF4, BCL…
GOTERM_BP_DIRECT GO:0050868~negative regulation of T cell activation 5 0.29171528588098017 0.004317085991647348 LAG3, TNFAIP8L2, TIGIT, LAX1, JAK3 1112 11 16792 6.863963374754742 0.9999998577267648 0.10084270098437778 0.09760488649064226
GOTERM_BP_DIRECT GO:0032700~negative regulation of interleukin-17 production 5 0.29171528588098017 0.004317085991647348 IFNG, TNFSF4, IL12B, NCKAP1L, FOXP3 1112 11 16792 6.863963374754742 0.9999998577267648 0.10084270098437778 0.09760488649064226
GOTERM_BP_DIRECT GO:0032703~negative regulation of interleukin-2 production 5 0.29171528588098017 0.004317085991647348 NR1H4, GATA3, VSIG4, FOXP3, HAVCR2 1112 11 16792 6.863963374754742 0.9999998577267648 0.10084270098437778 0.09760488649064226
GOTERM_BP_DIRECT GO:0042535~positive regulation of tumor necrosis factor biosynthetic process 5 0.29171528588098017 0.004317085991647348 SPN, TLR1, CYBB, TNFRSF8, CCR2 1112 11 16792 6.863963374754742 0.9999998577267648 0.10084270098437778 0.09760488649064226
GOTERM_BP_DIRECT GO:0002523~leukocyte migration involved in inflammatory response 5 0.29171528588098017 0.004317085991647348 ITGB2, CCL2, SELE, S100A8, CX3CL1 1112 11 16792 6.863963374754742 0.9999998577267648 0.10084270098437778 0.09760488649064226
GOTERM_BP_DIRECT GO:0050707~regulation of cytokine secretion 5 0.29171528588098017 0.004317085991647348 TLR1, TLR8, TLR10, TLR6, TLR2 1112 11 16792 6.863963374754742 0.9999998577267648 0.10084270098437778 0.09760488649064226
GOTERM_BP_DIRECT GO:2000107~negative regulation of leukocyte apoptotic process 4 0.2333722287047841 0.004964357117251584 CCL21, HCLS1, CCR7, CCL19 1112 6 16792 10.067146282973622 0.9999999866955783 0.11377432286330046 0.11012130536192666
GOTERM_BP_DIRECT GO:0001768~establishment of T cell polarity 4 0.2333722287047841 0.004964357117251584 CCL21, CCR7, CCL19, DOCK2 1112 6 16792 10.067146282973622 0.9999999866955783 0.11377432286330046 0.11012130536192666
GOTERM_BP_DIRECT GO:0036006~cellular response to macrophage colony-stimulating factor stimulus 4 0.2333722287047841 0.004964357117251584 CSF1R, DCSTAMP, PDE1B, CCL2 1112 6 16792 10.067146282973622 0.9999999866955783 0.11377432286330046 0.11012130536192666
GOTERM_BP_DIRECT GO:0018149~peptide cross-linking 10 0.5834305717619603 0.005029280511314575 SPRR2E, SPRR2F, SPRR3, LCE3D, SPRR2G, F13A1, SPRR2A, SPRR1A, SPRR1B, SPRR2D 1112 50 16792 3.0201438848920863 0.9999999895109957 0.11454186364518942 0.11086420227129065
GOTERM_BP_DIRECT GO:0050870~positive regulation of T cell activation 6 0.3500583430571762 0.005209312580483705 LCK, SIRPG, HLA-DPB1, CCL2, CCR2, HLA-DPA1 1112 18 16792 5.033573141486811 0.9999999945755587 0.11717737681038655 0.11341509550225944
GOTERM_BP_DIRECT GO:0030225~macrophage differentiation 6 0.3500583430571762 0.005209312580483705 CSF1R, SPI1, CSF1, CEBPE, IL31RA, GAB3 1112 18 16792 5.033573141486811 0.9999999945755587 0.11717737681038655 0.11341509550225944
GOTERM_BP_DIRECT GO:0007229~integrin-mediated signaling pathway 15 0.8751458576429404 0.005514715909636394 ITGAM, FCER1G, ITGB2, PLEK, ITGAL, PRAM1, TSPAN32, FGR, HCK, TYROBP, ITGAD, ADAM12, ITGAX, PLP1, ITGB7 1112 99 16792 2.287987791584914 0.9999999982281474 0.12328604156266883 0.11932762584838995
GOTERM_BP_DIRECT GO:0048661~positive regulation of smooth muscle cell proliferation 11 0.6417736289381564 0.005630610780093382 IL6, NR4A3, STAT1, CCL5, PTAFR, IL13, IGF1, RETN, PTGS2, AIF1, FGF2 1112 60 16792 2.7684652278177455 0.9999999988412543 0.12510942489427002 0.12109246476456927
GOTERM_BP_DIRECT GO:0019722~calcium-mediated signaling 10 0.5834305717619603 0.0057567416239683745 TREML1, CXCL8, SPHK1, BTK, PLCG2, CCL3, NMUR2, CXCR4, CCR5, SELE 1112 51 16792 2.9609253773451822 0.9999999992701488 0.12713676653176217 0.12305471338022095
GOTERM_BP_DIRECT GO:0097028~dendritic cell differentiation 5 0.29171528588098017 0.006139659190480334 BATF3, CSF2, FLT3, TREM2, LILRB1 1112 12 16792 6.291966426858513 0.9999999998206858 0.133172131488752 0.1288962974096675
GOTERM_BP_DIRECT GO:0045779~negative regulation of bone resorption 5 0.29171528588098017 0.006139659190480334 P2RX7, IL6, UBASH3B, CD38, CLDN18 1112 12 16792 6.291966426858513 0.9999999998206858 0.133172131488752 0.1288962974096675
GOTERM_BP_DIRECT GO:0050710~negative regulation of cytokine secretion 5 0.29171528588098017 0.006139659190480334 SRGN, IL6, TNFSF4, CIDEA, FOXP3 1112 12 16792 6.291966426858513 0.9999999998206858 0.133172131488752 0.1288962974096675
GOTERM_BP_DIRECT GO:0045429~positive regulation of nitric oxide biosynthetic process 9 0.5250875145857643 0.00651918167968624 IL6, KLRK1, IFNG, ITGB2, KLRC4-KLRK1, JAK2, PTGS2, AIF1, ICAM1 1112 43 16792 3.1606156934917182 0.9999999999554171 0.14056744402826424 0.1360541644038661
GOTERM_BP_DIRECT GO:0007218~neuropeptide signaling pathway 15 0.8751458576429404 0.006589326428131277 NXPH2, NXPH4, NPY2R, OPRL1, GPR84, SORCS3, MCHR1, ADCYAP1, CYSLTR1, CYSLTR2, PNOC, PENK, PROK2, NMUR2, NTSR1 1112 101 16792 2.242681102642638 0.9999999999655311 0.14124415002417867 0.13670914301187656
GOTERM_BP_DIRECT GO:0050918~positive chemotaxis 8 0.4667444574095682 0.00713871259379055 FGF7, GPNMB, CCL5, SAA4, SAA1, CCL3, SAA2, FGF2 1112 35 16792 3.451593011305242 0.9999999999954082 0.15212554790510388 0.14724116560408929
GOTERM_BP_DIRECT GO:0002224~toll-like receptor signaling pathway 7 0.40840140023337224 0.007358925725912336 TLR1, CTSL, CD180, TLR8, TLR10, TLR7, TLR6 1112 27 16792 3.9150013322675195 0.9999999999979539 0.1559065427047939 0.15090076183309772
GOTERM_BP_DIRECT GO:0050727~regulation of inflammatory response 11 0.6417736289381564 0.007984428515751669 HCK, PGLYRP2, FABP4, CMA1, TNFSF4, NLRP1, PIK3AP1, JAK2, PTGS2, SELE, BIRC3 1112 63 16792 2.636633550302615 0.9999999999997943 0.16192090345266738 0.15672201604762842
GOTERM_BP_DIRECT GO:0070233~negative regulation of T cell apoptotic process 4 0.2333722287047841 0.008262085591389481 CCL5, DOCK8, CD27, IDO1 1112 7 16792 8.628982528263105 0.9999999999999258 0.16192090345266738 0.15672201604762842
GOTERM_BP_DIRECT GO:0050869~negative regulation of B cell activation 4 0.2333722287047841 0.008262085591389481 BANK1, TBC1D10C, SLA2, SAMSN1 1112 7 16792 8.628982528263105 0.9999999999999258 0.16192090345266738 0.15672201604762842
GOTERM_BP_DIRECT GO:0072678~T cell migration 4 0.2333722287047841 0.008262085591389481 ZAP70, GPR15, ITGB7, MYO1G 1112 7 16792 8.628982528263105 0.9999999999999258 0.16192090345266738 0.15672201604762842
GOTERM_BP_DIRECT GO:0002860~positive regulation of natural killer cell mediated cytotoxicity directed against tumor cell target 4 0.2333722287047841 0.008262085591389481 NCR3, CRTAM, IL12B, CD226 1112 7 16792 8.628982528263105 0.9999999999999258 0.16192090345266738 0.15672201604762842
GOTERM_BP_DIRECT GO:2000503~positive regulation of natural killer cell chemotaxis 4 0.2333722287047841 0.008262085591389481 CCL7, CCL5, CCL4, CCL3 1112 7 16792 8.628982528263105 0.9999999999999258 0.16192090345266738 0.15672201604762842
GOTERM_BP_DIRECT GO:0070383~DNA cytosine deamination 4 0.2333722287047841 0.008262085591389481 APOBEC3D, APOBEC3G, APOBEC3H, APOBEC3A 1112 7 16792 8.628982528263105 0.9999999999999258 0.16192090345266738 0.15672201604762842
GOTERM_BP_DIRECT GO:0060732~positive regulation of inositol phosphate biosynthetic process 4 0.2333722287047841 0.008262085591389481 ADCYAP1R1, PTAFR, CD244, NTSR1 1112 7 16792 8.628982528263105 0.9999999999999258 0.16192090345266738 0.15672201604762842
GOTERM_BP_DIRECT GO:0008285~negative regulation of cell proliferation 40 2.3337222870478413 0.008336775286919392 CSF1R, PTPRU, CXCL8, CCL3L3, SIRPG, DPT, GATA3, PTGS2, FGF2, TSPAN32, IFIT3, NPPC, GPNMB, RASSF5, CYP1B1, TNFRSF8, SLIT3, JAK2, CD33, ENPP7, NKX3-1, IL10, TFAP2A, NTRK1, CCL23, TNFRSF9, ZBTB16, RARRES1, OSM, SSTR3, ALOX15B, FOXP3, PHOX2B, SFRP1, IL6, SFRP2, IRF1, GJB6, INSM1, TLR2 1112…
GOTERM_BP_DIRECT GO:0048469~cell maturation 8 0.4667444574095682 0.00836711410215852 IL21, BFSP2, CCL21, BTK, PLP1, GATA3, CCL19, POU2F2 1112 36 16792 3.355715427657874 0.9999999999999496 0.16192090345266738 0.15672201604762842
GOTERM_BP_DIRECT GO:0006957~complement activation, alternative pathway 5 0.29171528588098017 0.00840943986143921 C3, CFH, C7, VSIG4, CFP 1112 13 16792 5.8079690094078575 0.9999999999999568 0.16192090345266738 0.15672201604762842
GOTERM_BP_DIRECT GO:0048246~macrophage chemotaxis 5 0.29171528588098017 0.00840943986143921 CCL5, SAA1, CCL3, CCL2, CX3CL1 1112 13 16792 5.8079690094078575 0.9999999999999568 0.16192090345266738 0.15672201604762842
GOTERM_BP_DIRECT GO:0050901~leukocyte tethering or rolling 5 0.29171528588098017 0.00840943986143921 SELP, VCAM1, LEP, ITGB7, SELE 1112 13 16792 5.8079690094078575 0.9999999999999568 0.16192090345266738 0.15672201604762842
GOTERM_BP_DIRECT GO:0002526~acute inflammatory response 5 0.29171528588098017 0.00840943986143921 IL6, VCAM1, VNN1, TNFSF4, S100A8 1112 13 16792 5.8079690094078575 0.9999999999999568 0.16192090345266738 0.15672201604762842
GOTERM_BP_DIRECT GO:0043303~mast cell degranulation 5 0.29171528588098017 0.00840943986143921 MILR1, NR4A3, PIK3CD, RASGRP1, PIK3CG 1112 13 16792 5.8079690094078575 0.9999999999999568 0.16192090345266738 0.15672201604762842
GOTERM_BP_DIRECT GO:0032740~positive regulation of interleukin-17 production 5 0.29171528588098017 0.00840943986143921 IL21, IL12B, SLAMF6, LY9, IL2 1112 13 16792 5.8079690094078575 0.9999999999999568 0.16192090345266738 0.15672201604762842
GOTERM_BP_DIRECT GO:0048872~homeostasis of number of cells 5 0.29171528588098017 0.00840943986143921 EMX1, RASSF2, CCR7, IL7R, CCR4 1112 13 16792 5.8079690094078575 0.9999999999999568 0.16192090345266738 0.15672201604762842
GOTERM_BP_DIRECT GO:0006801~superoxide metabolic process 6 0.3500583430571762 0.008442637666302636 NRROS, NCF1, NCF2, NCF1B, CYBB, NCF1C 1112 20 16792 4.53021582733813 0.9999999999999618 0.16192090345266738 0.15672201604762842
GOTERM_BP_DIRECT GO:0008015~blood circulation 9 0.5250875145857643 0.008624704038439318 CXCL10, HTR7, STAT1, XCL2, C3AR1, SERPING1, OLR1, MEOX2, FLI1 1112 45 16792 3.0201438848920863 0.9999999999999805 0.1636896953962129 0.15843401637278895
GOTERM_BP_DIRECT GO:0032755~positive regulation of interleukin-6 production 9 0.5250875145857643 0.008624704038439318 P2RX7, ADCYAP1, IL6, FCER1G, TNFSF4, TLR7, LILRB2, CD36, TLR2 1112 45 16792 3.0201438848920863 0.9999999999999805 0.1636896953962129 0.15843401637278895
GOTERM_BP_DIRECT GO:0050690~regulation of defense response to virus by virus 7 0.40840140023337224 0.008852344995492614 HCK, CD4, CD8B, LCK, CD28, CD247, DOCK2 1112 28 16792 3.7751798561151078 0.9999999999999916 0.16713961224650303 0.16177316476218886
GOTERM_BP_DIRECT GO:0060337~type I interferon signaling pathway 11 0.6417736289381564 0.008917277675822056 BST2, RSAD2, STAT1, OAS2, IRF4, IRF1, XAF1, GBP2, IFIT1, IFIT3, IFIT2 1112 64 16792 2.5954361510791366 0.9999999999999933 0.16749773118915243 0.16211978537435254
GOTERM_BP_DIRECT GO:0050830~defense response to Gram-positive bacterium 13 0.7584597432905484 0.009903548416676494 PGLYRP2, C5AR1, P2RX7, FGR, IL6, KLRK1, KLRC4-KLRK1, LTA, ACP5, TNFSF8, CD36, HAVCR2, TLR2 1112 85 16792 2.3095217943292425 0.9999999999999998 0.18506938682240587 0.17912725777239996
GOTERM_BP_DIRECT GO:0048015~phosphatidylinositol-mediated signaling 15 0.8751458576429404 0.010015075010488424 CD86, NTRK1, CSF1R, TRAT1, CD80, PTAFR, PIK3CD, IGF1, FGF2, MUC5AC, PIK3CG, FGF7, LCK, CD19, CD28 1112 106 16792 2.1368942581783625 0.9999999999999999 0.18619863948071336 0.18022025286730955
GOTERM_BP_DIRECT GO:0007200~phospholipase C-activating G-protein coupled receptor signaling pathway 11 0.6417736289381564 0.011030880894831998 ANO1, CYSLTR1, CYSLTR2, CCKAR, C5AR1, FPR1, C3AR1, NMUR2, FPR3, FPR2, GPR84 1112 66 16792 2.5167865707434047 1.0 0.2030665410837347 0.19654656706979481
GOTERM_BP_DIRECT GO:0030216~keratinocyte differentiation 12 0.7001166861143524 0.01104852890465216 SPRR2E, SPRR2F, SPRR3, LCE3D, SPRR2G, KRT16, SPRR2A, POU3F1, SPRR1A, TP63, SPRR1B, SPRR2D 1112 76 16792 2.384324119651647 1.0 0.2030665410837347 0.19654656706979481
GOTERM_BP_DIRECT GO:2000147~positive regulation of cell motility 5 0.29171528588098017 0.01116548035749221 CSF1R, CCL21, SPOCK2, CCR7, CCL19 1112 14 16792 5.39311408016444 1.0 0.2030665410837347 0.19654656706979481
GOTERM_BP_DIRECT GO:0030889~negative regulation of B cell proliferation 5 0.29171528588098017 0.01116548035749221 IL10, TNFRSF13B, CD300A, CTLA4, MNDA 1112 14 16792 5.39311408016444 1.0 0.2030665410837347 0.19654656706979481
GOTERM_BP_DIRECT GO:0045860~positive regulation of protein kinase activity 9 0.5250875145857643 0.011200980998306992 ADCYAP1, CD4, RASSF2, PTPRC, CSF1, CCL21, LCP2, CCR7, CCL19 1112 47 16792 2.8916271238328486 1.0 0.2030665410837347 0.19654656706979481
GOTERM_BP_DIRECT GO:0042517~positive regulation of tyrosine phosphorylation of Stat3 protein 8 0.4667444574095682 0.011279251402410055 IL21, CSF1R, IL6, LEP, OSM, IL31RA, IL12B, JAK2 1112 38 16792 3.179098826202196 1.0 0.20347322826921901 0.19694019651633796
GOTERM_BP_DIRECT GO:0010560~positive regulation of glycoprotein biosynthetic process 3 0.1750291715285881 0.012543585220246437 CCL21, IGF1, CCL19 1112 3 16792 15.100719424460433 1.0 0.20809981684804635 0.2014182365595663
GOTERM_BP_DIRECT GO:0032252~secretory granule localization 3 0.1750291715285881 0.012543585220246437 MYO5A, RASGRP1, PIK3CG 1112 3 16792 15.100719424460433 1.0 0.20809981684804635 0.2014182365595663
GOTERM_BP_DIRECT GO:0045590~negative regulation of regulatory T cell differentiation 3 0.1750291715285881 0.012543585220246437 IRF1, TNFSF4, CTLA4 1112 3 16792 15.100719424460433 1.0 0.20809981684804635 0.2014182365595663
GOTERM_BP_DIRECT GO:0001781~neutrophil apoptotic process 3 0.1750291715285881 0.012543585220246437 HCAR2, IL6, IFNG 1112 3 16792 15.100719424460433 1.0 0.20809981684804635 0.2014182365595663
GOTERM_BP_DIRECT GO:0030886~negative regulation of myeloid dendritic cell activation 3 0.1750291715285881 0.012543585220246437 IL10, TSPAN32, HAVCR2 1112 3 16792 15.100719424460433 1.0 0.20809981684804635 0.2014182365595663
GOTERM_BP_DIRECT GO:0002291~T cell activation via T cell receptor contact with antigen bound to MHC molecule on antigen presenting cell 3 0.1750291715285881 0.012543585220246437 APBB1IP, ITGAL, ICAM1 1112 3 16792 15.100719424460433 1.0 0.20809981684804635 0.2014182365595663
GOTERM_BP_DIRECT GO:0071727~cellular response to triacyl bacterial lipopeptide 3 0.1750291715285881 0.012543585220246437 TLR1, CD14, TLR2 1112 3 16792 15.100719424460433 1.0 0.20809981684804635 0.2014182365595663
GOTERM_BP_DIRECT GO:0042269~regulation of natural killer cell mediated cytotoxicity 3 0.1750291715285881 0.012543585220246437 NCR1, LEP, PIK3R6 1112 3 16792 15.100719424460433 1.0 0.20809981684804635 0.2014182365595663
GOTERM_BP_DIRECT GO:0038123~toll-like receptor TLR1:TLR2 signaling pathway 3 0.1750291715285881 0.012543585220246437 TLR1, CD14, TLR2 1112 3 16792 15.100719424460433 1.0 0.20809981684804635 0.2014182365595663
GOTERM_BP_DIRECT GO:2000502~negative regulation of natural killer cell chemotaxis 3 0.1750291715285881 0.012543585220246437 KLRK1, KLRC4-KLRK1, CCL2 1112 3 16792 15.100719424460433 1.0 0.20809981684804635 0.2014182365595663
GOTERM_BP_DIRECT GO:0002292~T cell differentiation involved in immune response 3 0.1750291715285881 0.012543585220246437 CLEC4D, FCER1G, CLEC4E 1112 3 16792 15.100719424460433 1.0 0.20809981684804635 0.2014182365595663
GOTERM_BP_DIRECT GO:0002827~positive regulation of T-helper 1 type immune response 4 0.2333722287047841 0.012574143083352272 SLC11A1, IL12B, IL12RB1, CCR2 1112 8 16792 7.550359712230216 1.0 0.20809981684804635 0.2014182365595663
GOTERM_BP_DIRECT GO:0010529~negative regulation of transposition 4 0.2333722287047841 0.012574143083352272 APOBEC3D, APOBEC3G, APOBEC3H, APOBEC3A 1112 8 16792 7.550359712230216 1.0 0.20809981684804635 0.2014182365595663
GOTERM_BP_DIRECT GO:0050702~interleukin-1 beta secretion 4 0.2333722287047841 0.012574143083352272 GBP5, AIM2, CD36, TLR6 1112 8 16792 7.550359712230216 1.0 0.20809981684804635 0.2014182365595663
GOTERM_BP_DIRECT GO:1902715~positive regulation of interferon-gamma secretion 4 0.2333722287047841 0.012574143083352272 CD2, RASGRP1, CD244, SLAMF1 1112 8 16792 7.550359712230216 1.0 0.20809981684804635 0.2014182365595663
GOTERM_BP_DIRECT GO:0050862~positive regulation of T cell receptor signaling pathway 4 0.2333722287047841 0.012574143083352272 TESPA1, TRAT1, LCK, CCR7 1112 8 16792 7.550359712230216 1.0 0.20809981684804635 0.2014182365595663
GOTERM_BP_DIRECT GO:0045059~positive thymic T cell selection 4 0.2333722287047841 0.012574143083352272 CD74, ZAP70, DOCK2, CD3D 1112 8 16792 7.550359712230216 1.0 0.20809981684804635 0.2014182365595663
GOTERM_BP_DIRECT GO:0045410~positive regulation of interleukin-6 biosynthetic process 4 0.2333722287047841 0.012574143083352272 TLR1, IFNG, PTAFR, TLR6 1112 8 16792 7.550359712230216 1.0 0.20809981684804635 0.2014182365595663
GOTERM_BP_DIRECT GO:0006909~phagocytosis 9 0.5250875145857643 0.012683323797026214 CEBPE, LEP, SLC11A1, CEACAM4, ITGB2, ICAM3, CD14, ITGAL, SLAMF1 1112 48 16792 2.831384892086331 1.0 0.20809981684804635 0.2014182365595663
GOTERM_BP_DIRECT GO:0034113~heterotypic cell-cell adhesion 6 0.3500583430571762 0.0128491928624617 CD2, ITGAD, ITGB2, ITGAX, ITGB7, LILRB2 1112 22 16792 4.118378024852846 1.0 0.20809981684804635 0.2014182365595663
GOTERM_BP_DIRECT GO:0008037~cell recognition 6 0.3500583430571762 0.0128491928624617 CADM3, NCR3, CLEC7A, CRTAM, CD226, TIGIT 1112 22 16792 4.118378024852846 1.0 0.20809981684804635 0.2014182365595663
GOTERM_BP_DIRECT GO:0050718~positive regulation of interleukin-1 beta secretion 6 0.3500583430571762 0.0128491928624617 P2RX7, AIM2, IFNG, CCL3, CCL19, NLRP1 1112 22 16792 4.118378024852846 1.0 0.20809981684804635 0.2014182365595663
GOTERM_BP_DIRECT GO:0001954~positive regulation of cell-matrix adhesion 6 0.3500583430571762 0.0128491928624617 CCL25, SFRP1, CSF1, CCL21, CCR7, CD36 1112 22 16792 4.118378024852846 1.0 0.20809981684804635 0.2014182365595663
GOTERM_BP_DIRECT GO:0030199~collagen fibril organization 8 0.4667444574095682 0.012982147747172514 GREM1, ADAMTS2, SFRP2, TNXB, COL14A1, COL11A1, CYP1B1, DPT 1112 39 16792 3.0975834716841915 1.0 0.20932277164025062 0.20260192524016574
GOTERM_BP_DIRECT GO:0010951~negative regulation of endopeptidase activity 16 0.9334889148191364 0.013733013502403366 SERPINB3, SERPINB4, SERPINB13, SERPINB2, SERPINF1, SERPINE1, SERPINA9, SERPINB7, BST2, C3, C4A, SPOCK2, CD109, HMSD, CARD17, SERPING1 1112 121 16792 1.9967893453831975 1.0 0.22045419032051924 0.21337594107038182
GOTERM_BP_DIRECT GO:0034162~toll-like receptor 9 signaling pathway 5 0.29171528588098017 0.014441733614194506 NR1H4, TLR8, TLR7, PIK3AP1, HAVCR2 1112 15 16792 5.03357314148681 1.0 0.23081437407949465 0.2234034844616843
GOTERM_BP_DIRECT GO:0010332~response to gamma radiation 7 0.40840140023337224 0.014615841568151804 CXCL10, PTPRC, CCL7, BCL2, CCL2, GATA3, TP63 1112 31 16792 3.409839870039452 1.0 0.23257697237705316 0.22510949000380528
GOTERM_BP_DIRECT GO:0030097~hemopoiesis 10 0.5834305717619603 0.014854238390015208 IL10, SPTA1, CSF1R, IFI16, CSF1, FLT3, LCK, GFI1, ZBTB16, ADD2 1112 59 16792 2.5594439702475307 1.0 0.23444706738696977 0.22691954079962745
GOTERM_BP_DIRECT GO:0045071~negative regulation of viral genome replication 8 0.4667444574095682 0.014862039672445121 BST2, IFI16, RSAD2, APOBEC3G, CCL5, IFIT1, APOBEC3A, LTF 1112 40 16792 3.0201438848920863 1.0 0.23444706738696977 0.22691954079962745
GOTERM_BP_DIRECT GO:0051209~release of sequestered calcium ion into cytosol 8 0.4667444574095682 0.016927924613200633 P2RX7, PTPRC, CCL21, LCK, PLCG2, CCR7, CCL19, FGF2 1112 41 16792 2.9464818389191088 1.0 0.2658851607349272 0.25734823323602857
GOTERM_BP_DIRECT GO:0045907~positive regulation of vasoconstriction 7 0.40840140023337224 0.01700862179714219 HRH2, PTAFR, CD38, DBH, PTGS2, SMTNL1, ICAM1 1112 32 16792 3.3032823741007196 1.0 0.26600608510208645 0.25746527501510946
GOTERM_BP_DIRECT GO:0009887~organ morphogenesis 13 0.7584597432905484 0.01794228659325972 GATA5, GATA3, PAX5, FGF2, DCN, FLI1, ETV7, COMP, ITGAX, CCL2, EVL, SLIT3, PITX3 1112 92 16792 2.1337973099781045 1.0 0.27473929303042277 0.26591808082280494
GOTERM_BP_DIRECT GO:0048245~eosinophil chemotaxis 4 0.2333722287047841 0.017944004319769655 CCL13, CCL7, CCL5, CCL3 1112 9 16792 6.711430855315748 1.0 0.27473929303042277 0.26591808082280494
GOTERM_BP_DIRECT GO:0009972~cytidine deamination 4 0.2333722287047841 0.017944004319769655 APOBEC3G, APOBEC3H, AICDA, APOBEC3A 1112 9 16792 6.711430855315748 1.0 0.27473929303042277 0.26591808082280494
GOTERM_BP_DIRECT GO:0002544~chronic inflammatory response 4 0.2333722287047841 0.017944004319769655 VCAM1, VNN1, CXCL13, S100A8 1112 9 16792 6.711430855315748 1.0 0.27473929303042277 0.26591808082280494
GOTERM_BP_DIRECT GO:0071223~cellular response to lipoteichoic acid 4 0.2333722287047841 0.017944004319769655 TREM2, CD14, CD36, TLR2 1112 9 16792 6.711430855315748 1.0 0.27473929303042277 0.26591808082280494
GOTERM_BP_DIRECT GO:0010744~positive regulation of macrophage derived foam cell differentiation 5 0.29171528588098017 0.018266828127550767 MSR1, CSF2, CSF1, CD36, ALOX15B 1112 16 16792 4.718974820143885 1.0 0.2785118062627406 0.269569467806994
GOTERM_BP_DIRECT GO:0045671~negative regulation of osteoclast differentiation 6 0.3500583430571762 0.01859126778538044 SFRP1, MAFB, UBASH3B, CCL3, LILRB3, LILRB4 1112 24 16792 3.775179856115108 1.0 0.2811061402901507 0.27208050406239337
GOTERM_BP_DIRECT GO:0051602~response to electrical stimulus 6 0.3500583430571762 0.01859126778538044 NTRK1, P2RX7, IL6, GJB6, CD14, AIF1 1112 24 16792 3.775179856115108 1.0 0.2811061402901507 0.27208050406239337
GOTERM_BP_DIRECT GO:0030335~positive regulation of cell migration 21 1.2252042007001167 0.0196537530774374 SERPINB3, CCR1, CD274, TCAF2, CSF1R, TNFAIP6, CSF1, SEMA3D, SPHK1, SEMA3G, PIK3CD, IGF1, AIF1, FGR, TIAM1, CCL7, GPNMB, CCL5, CCL3, INSM1, JAK2 1112 184 16792 1.7234516734438536 1.0 0.2947821622988103 0.28531742218109335
GOTERM_BP_DIRECT GO:0043491~protein kinase B signaling 7 0.40840140023337224 0.019657537167566113 P2RY12, CD40, CCL5, CCL3, CCL2, IGF1, NKX3-1 1112 33 16792 3.203182908218879 1.0 0.2947821622988103 0.28531742218109335
GOTERM_BP_DIRECT GO:0042472~inner ear morphogenesis 9 0.5250875145857643 0.020067775912241397 TBX1, TFAP2A, HMX3, MAFB, PRRX1, PTPRQ, COL11A1, GATA3, WNT1 1112 52 16792 2.613586054233536 1.0 0.2980761351913947 0.28850563359496406
GOTERM_BP_DIRECT GO:0043123~positive regulation of I-kappaB kinase/NF-kappaB signaling 19 1.1085180863477246 0.020113230999844016 CD40, CCL21, PRKCB, ADIPOQ, SECTM1, FASLG, S100B, BST2, UBD, CLEC6A, S100A12, CCR7, CD36, CCL19, TLR6, APOL3, TRIM22, BIRC3, LTF 1112 161 16792 1.7820724786630324 1.0 0.2980761351913947 0.28850563359496406
GOTERM_BP_DIRECT GO:0016525~negative regulation of angiogenesis 10 0.5834305717619603 0.020122593100187457 CXCL10, ADGRB2, ADGRB3, STAT1, SERPINF1, CCL2, FASLG, THBS2, DCN, CCR2 1112 62 16792 2.4355999071710372 1.0 0.2980761351913947 0.28850563359496406
GOTERM_BP_DIRECT GO:0031623~receptor internalization 8 0.4667444574095682 0.021651936853990784 RAB31, CXCL8, FCER1G, CXCR1, ITGB2, LILRB1, CD36, RAMP1 1112 43 16792 2.809436171992638 1.0 0.3194318133438964 0.3091756327288481
GOTERM_BP_DIRECT GO:0034612~response to tumor necrosis factor 6 0.3500583430571762 0.022006644549887367 UBD, ADIPOQ, CD14, JAK2, PTGS2, SELE 1112 25 16792 3.624172661870504 1.0 0.32335569653140955 0.31297352954618046
GOTERM_BP_DIRECT GO:0051897~positive regulation of protein kinase B signaling 12 0.7001166861143524 0.02225482787144542 IL6, CCL21, LEP, CD28, CCL3, HCLS1, CCR7, GATA3, CCL19, FGF2, PIK3CG, PIK3R5 1112 84 16792 2.157245632065776 1.0 0.32568912756444623 0.3152320397694297
GOTERM_BP_DIRECT GO:0030224~monocyte differentiation 5 0.29171528588098017 0.02266398200651015 CSF1R, CSF2, IFI16, PDE1B, IL31RA 1112 17 16792 4.441388066017773 1.0 0.3290340654650318 0.3184695798285311
GOTERM_BP_DIRECT GO:0048535~lymph node development 5 0.29171528588098017 0.02266398200651015 LTA, CXCR5, LTB, CXCL13, IL7R 1112 17 16792 4.441388066017773 1.0 0.3290340654650318 0.3184695798285311
GOTERM_BP_DIRECT GO:0034154~toll-like receptor 7 signaling pathway 3 0.1750291715285881 0.023988790675600235 TLR7, PIK3AP1, HAVCR2 1112 4 16792 11.325539568345325 1.0 0.33237700844824053 0.321705189022213
GOTERM_BP_DIRECT GO:0030260~entry into host cell 3 0.1750291715285881 0.023988790675600235 CD4, CXCR4, CCR5 1112 4 16792 11.325539568345325 1.0 0.33237700844824053 0.321705189022213
GOTERM_BP_DIRECT GO:0010574~regulation of vascular endothelial growth factor production 3 0.1750291715285881 0.023988790675600235 IL6, CCL2, CCR2 1112 4 16792 11.325539568345325 1.0 0.33237700844824053 0.321705189022213
GOTERM_BP_DIRECT GO:0070232~regulation of T cell apoptotic process 3 0.1750291715285881 0.023988790675600235 CD274, JAK3, GIMAP8 1112 4 16792 11.325539568345325 1.0 0.33237700844824053 0.321705189022213
GOTERM_BP_DIRECT GO:0048305~immunoglobulin secretion 3 0.1750291715285881 0.023988790675600235 CD40LG, LAX1, TNFSF13B 1112 4 16792 11.325539568345325 1.0 0.33237700844824053 0.321705189022213
GOTERM_BP_DIRECT GO:0007260~tyrosine phosphorylation of STAT protein 3 0.1750291715285881 0.023988790675600235 LEP, JAK2, JAK3 1112 4 16792 11.325539568345325 1.0 0.33237700844824053 0.321705189022213
GOTERM_BP_DIRECT GO:0038094~Fc-gamma receptor signaling pathway 3 0.1750291715285881 0.023988790675600235 CLEC4D, FCER1G, CLEC4E 1112 4 16792 11.325539568345325 1.0 0.33237700844824053 0.321705189022213
GOTERM_BP_DIRECT GO:2001205~negative regulation of osteoclast development 3 0.1750291715285881 0.023988790675600235 CLDN18, LILRB1, LTF 1112 4 16792 11.325539568345325 1.0 0.33237700844824053 0.321705189022213
GOTERM_BP_DIRECT GO:0043372~positive regulation of CD4-positive, alpha-beta T cell differentiation 3 0.1750291715285881 0.023988790675600235 SASH3, TNFSF4, NCKAP1L 1112 4 16792 11.325539568345325 1.0 0.33237700844824053 0.321705189022213
GOTERM_BP_DIRECT GO:0002283~neutrophil activation involved in immune response 3 0.1750291715285881 0.023988790675600235 ZAP70, TYROBP, FCER1G 1112 4 16792 11.325539568345325 1.0 0.33237700844824053 0.321705189022213
GOTERM_BP_DIRECT GO:0042421~norepinephrine biosynthetic process 3 0.1750291715285881 0.023988790675600235 GATA3, DBH, INSM1 1112 4 16792 11.325539568345325 1.0 0.33237700844824053 0.321705189022213
GOTERM_BP_DIRECT GO:0046006~regulation of activated T cell proliferation 3 0.1750291715285881 0.023988790675600235 CD274, CLC, IDO1 1112 4 16792 11.325539568345325 1.0 0.33237700844824053 0.321705189022213
GOTERM_BP_DIRECT GO:2000406~positive regulation of T cell migration 4 0.2333722287047841 0.024392308078771373 CXCL10, CCL21, CCL5, AIF1 1112 10 16792 6.040287769784173 1.0 0.33290475894772614 0.3222159947334331
GOTERM_BP_DIRECT GO:0002675~positive regulation of acute inflammatory response 4 0.2333722287047841 0.024392308078771373 IL6, ALOX5AP, OSM, PIK3CG 1112 10 16792 6.040287769784173 1.0 0.33290475894772614 0.3222159947334331
GOTERM_BP_DIRECT GO:0033089~positive regulation of T cell differentiation in thymus 4 0.2333722287047841 0.024392308078771373 VNN1, TESPA1, IL7R, RASGRP1 1112 10 16792 6.040287769784173 1.0 0.33290475894772614 0.3222159947334331
GOTERM_BP_DIRECT GO:0010820~positive regulation of T cell chemotaxis 4 0.2333722287047841 0.024392308078771373 TNFSF14, CCL5, CXCL13, CCR2 1112 10 16792 6.040287769784173 1.0 0.33290475894772614 0.3222159947334331
GOTERM_BP_DIRECT GO:0018108~peptidyl-tyrosine phosphorylation 18 1.0501750291715286 0.02471650118206586 NTRK1, CSF1R, CSF2, FLT3, IL5RA, CSF2RB, FGF2, FGR, HCK, ZAP70, FGF7, EFEMP1, ABI3, BTK, ROR1, JAK2, IL12RB1, JAK3 1112 153 16792 1.7765552264071096 1.0 0.3360706354755522 0.32528022264606826
GOTERM_BP_DIRECT GO:0007202~activation of phospholipase C activity 6 0.3500583430571762 0.02580436906908358 ITK, ADCYAP1R1, C5AR1, SELE, S1PR4, RASGRP4 1112 26 16792 3.484781405644715 1.0 0.3495580702146489 0.338334608574936
GOTERM_BP_DIRECT GO:0007417~central nervous system development 15 0.8751458576429404 0.02717215122956602 SH3GL3, ZBTB16, HAPLN3, S100B, HPCAL4, DCLK1, SNTG2, VNN1, VNN2, PTPRZ1, VNN3, IL1RAPL2, DNER, MAL, NMUR2 1112 120 16792 1.8875899280575539 1.0 0.36672340400199477 0.3549488051358495
GOTERM_BP_DIRECT GO:0033280~response to vitamin D 5 0.29171528588098017 0.027651030413629558 CXCL10, CD4, SPP1, ALPL, PTGS2 1112 18 16792 4.194644284572342 1.0 0.3679055716891937 0.35609301628643963
GOTERM_BP_DIRECT GO:0045089~positive regulation of innate immune response 5 0.29171528588098017 0.027651030413629558 GBP5, CCL5, MMP2, SH2D1B, TLR8 1112 18 16792 4.194644284572342 1.0 0.3679055716891937 0.35609301628643963
GOTERM_BP_DIRECT GO:0002690~positive regulation of leukocyte chemotaxis 5 0.29171528588098017 0.027651030413629558 CXCL10, IL6, CXCL11, CXCL9, CXCL5 1112 18 16792 4.194644284572342 1.0 0.3679055716891937 0.35609301628643963
GOTERM_BP_DIRECT GO:0022617~extracellular matrix disassembly 11 0.6417736289381564 0.02766359128508207 MMP12, MMP1, CTSL, CMA1, MMP2, SPP1, TLL1, CTSG, LCP1, TPSAB1, DCN 1112 76 16792 2.1856304430140097 1.0 0.3679055716891937 0.35609301628643963
GOTERM_BP_DIRECT GO:0051092~positive regulation of NF-kappaB transcription factor activity 16 0.9334889148191364 0.029799571318004092 NTRK1, CD40, PRKCB, SPHK1, ITGB2, ICAM1, GREM1, IL6, AIM2, CD40LG, BTK, S100A12, S100A8, TRIM22, TLR2, LTF 1112 133 16792 1.8166279006869692 1.0 0.3917824433466216 0.37920325951798417
GOTERM_BP_DIRECT GO:0051281~positive regulation of release of sequestered calcium ion into cytosol 6 0.3500583430571762 0.029996515283673825 CXCL10, CXCL11, CXCL9, CD19, IL13, NTSR1 1112 27 16792 3.355715427657874 1.0 0.3917824433466216 0.37920325951798417
GOTERM_BP_DIRECT GO:0014065~phosphatidylinositol 3-kinase signaling 6 0.3500583430571762 0.029996515283673825 PIK3CD, GATA3, IGF1, PIK3R6, PIK3CG, PIK3R5 1112 27 16792 3.355715427657874 1.0 0.3917824433466216 0.37920325951798417
GOTERM_BP_DIRECT GO:0050832~defense response to fungus 6 0.3500583430571762 0.029996515283673825 GNLY, CLEC6A, S100A12, CTSG, HAMP, S100A8 1112 27 16792 3.355715427657874 1.0 0.3917824433466216 0.37920325951798417
GOTERM_BP_DIRECT GO:0010575~positive regulation of vascular endothelial growth factor production 6 0.3500583430571762 0.029996515283673825 C3, CCBE1, C5AR1, C3AR1, CYP1B1, PTGS2 1112 27 16792 3.355715427657874 1.0 0.3917824433466216 0.37920325951798417
GOTERM_BP_DIRECT GO:0042511~positive regulation of tyrosine phosphorylation of Stat1 protein 4 0.2333722287047841 0.03192051636017455 IL21, CD40, IFNG, TNFRSF18 1112 11 16792 5.491170699803794 1.0 0.41247645963289387 0.3992328411430342
GOTERM_BP_DIRECT GO:0016064~immunoglobulin mediated immune response 4 0.2333722287047841 0.03192051636017455 CD74, FCER1G, CD27, TLR8 1112 11 16792 5.491170699803794 1.0 0.41247645963289387 0.3992328411430342
GOTERM_BP_DIRECT GO:0043306~positive regulation of mast cell degranulation 4 0.2333722287047841 0.03192051636017455 FGR, ZAP70, FCER1G, IL13 1112 11 16792 5.491170699803794 1.0 0.41247645963289387 0.3992328411430342
GOTERM_BP_DIRECT GO:0014066~regulation of phosphatidylinositol 3-kinase signaling 11 0.6417736289381564 0.03243045558047491 PPP1R16B, CD86, FGF7, TRAT1, LCK, CD19, CD80, CD28, PIK3CD, FGF2, RASGRP1 1112 78 16792 2.129588636782881 1.0 0.4175850888171398 0.40417744463722616
GOTERM_BP_DIRECT GO:0046579~positive regulation of Ras protein signal transduction 5 0.29171528588098017 0.03324054423732853 NTRK1, CSF1, IGF1, RASGRP1, RASGRP4 1112 19 16792 3.9738735327527452 1.0 0.4250124322835971 0.41136631412300956
GOTERM_BP_DIRECT GO:0042098~T cell proliferation 5 0.29171528588098017 0.03324054423732853 P2RX7, TNFSF14, TNFSF4, EBI3, PIK3CG 1112 19 16792 3.9738735327527452 1.0 0.4250124322835971 0.41136631412300956
GOTERM_BP_DIRECT GO:0031100~organ regeneration 8 0.4667444574095682 0.033684522813369595 PTPRU, NNMT, NR4A3, FLT3, C5AR1, CCL2, LCP1, WNT1 1112 47 16792 2.5703352211847545 1.0 0.42918322074097487 0.41540318868096
GOTERM_BP_DIRECT GO:0030198~extracellular matrix organization 21 1.2252042007001167 0.03554523008868203 POSTN, ITGAM, VCAM1, COL14A1, COL11A1, ITGB2, SERPINE1, ICAM3, ITGAL, FGF2, DCN, ICAM1, MFAP5, COMP, CCDC80, ITGAD, ABI3BP, SPOCK2, ITGAX, SPP1, ITGB7 1112 196 16792 1.617934224049332 1.0 0.4513129562479349 0.4368223920654408
GOTERM_BP_DIRECT GO:0070445~regulation of oligodendrocyte progenitor proliferation 3 0.1750291715285881 0.038240984808451554 EMX1, ADCYAP1, PTPRZ1 1112 5 16792 9.06043165467626 1.0 0.4739800974217601 0.45876174632451916
GOTERM_BP_DIRECT GO:1900227~positive regulation of NLRP3 inflammasome complex assembly 3 0.1750291715285881 0.038240984808451554 GBP5, CD36, TLR6 1112 5 16792 9.06043165467626 1.0 0.4739800974217601 0.45876174632451916
GOTERM_BP_DIRECT GO:0001915~negative regulation of T cell mediated cytotoxicity 3 0.1750291715285881 0.038240984808451554 PTPRC, LILRB1, IL7R 1112 5 16792 9.06043165467626 1.0 0.4739800974217601 0.45876174632451916
GOTERM_BP_DIRECT GO:0042531~positive regulation of tyrosine phosphorylation of STAT protein 3 0.1750291715285881 0.038240984808451554 FLT3, CCL5, HCLS1 1112 5 16792 9.06043165467626 1.0 0.4739800974217601 0.45876174632451916
GOTERM_BP_DIRECT GO:0002322~B cell proliferation involved in immune response 3 0.1750291715285881 0.038240984808451554 CD180, PLCL2, GAPT 1112 5 16792 9.06043165467626 1.0 0.4739800974217601 0.45876174632451916
GOTERM_BP_DIRECT GO:0097029~mature conventional dendritic cell differentiation 3 0.1750291715285881 0.038240984808451554 CCR7, PRTN3, CCL19 1112 5 16792 9.06043165467626 1.0 0.4739800974217601 0.45876174632451916
GOTERM_BP_DIRECT GO:0002309~T cell proliferation involved in immune response 3 0.1750291715285881 0.038240984808451554 CD86, SLC11A1, LILRB1 1112 5 16792 9.06043165467626 1.0 0.4739800974217601 0.45876174632451916
GOTERM_BP_DIRECT GO:0014911~positive regulation of smooth muscle cell migration 5 0.29171528588098017 0.039440020881446276 POSTN, CCL5, BCL2, IGF1, RETN 1112 20 16792 3.7751798561151078 1.0 0.48425979964189575 0.4687113922439535
GOTERM_BP_DIRECT GO:0071407~cellular response to organic cyclic compound 9 0.5250875145857643 0.03954715516358298 MSR1, P2RY13, STAT1, CCL5, ANKRD1, CCL3, ALPL, CYP1B1, CCL2 1112 59 16792 2.3034995732227777 1.0 0.48425979964189575 0.4687113922439535
GOTERM_BP_DIRECT GO:0001662~behavioral fear response 6 0.3500583430571762 0.039601926534930006 ADCYAP1, NPY2R, PENK, BCL2, CCK, MAPK8IP2 1112 29 16792 3.1242867774745724 1.0 0.48425979964189575 0.4687113922439535
GOTERM_BP_DIRECT GO:0035774~positive regulation of insulin secretion involved in cellular response to glucose stimulus 6 0.3500583430571762 0.039601926534930006 GPR27, ANO1, HLA-DRB5, GPR68, NR1H4, HLA-DRB1 1112 29 16792 3.1242867774745724 1.0 0.48425979964189575 0.4687113922439535
GOTERM_BP_DIRECT GO:0001779~natural killer cell differentiation 4 0.2333722287047841 0.04051413541670965 ZNF683, PIK3CD, SLAMF6, SLAMF1 1112 12 16792 5.033573141486811 1.0 0.49009157068106113 0.47435591926237725
GOTERM_BP_DIRECT GO:0050777~negative regulation of immune response 4 0.2333722287047841 0.04051413541670965 IL2RA, CTLA4, LILRB2, FOXP3 1112 12 16792 5.033573141486811 1.0 0.49009157068106113 0.47435591926237725
GOTERM_BP_DIRECT GO:0045744~negative regulation of G-protein coupled receptor protein signaling pathway 4 0.2333722287047841 0.04051413541670965 RGS4, CXCL8, CCL5, PLEK 1112 12 16792 5.033573141486811 1.0 0.49009157068106113 0.47435591926237725
GOTERM_BP_DIRECT GO:0043410~positive regulation of MAPK cascade 11 0.6417736289381564 0.04061680964480803 TBX1, NGFR, IL6, ADRB3, BANK1, FLT3, CAV2, LEP, OSM, CD27, IGF1 1112 81 16792 2.0507149835687004 1.0 0.49009157068106113 0.47435591926237725
GOTERM_BP_DIRECT GO:0001934~positive regulation of protein phosphorylation 15 0.8751458576429404 0.04126878039784949 NTRK1, TBX1, CSF1R, CD40, ADIPOQ, OPRL1, AIF1, RASGRP1, SPN, C3, GPNMB, FAM20A, RSPO1, WNT1, NKX3-1 1112 127 16792 1.7835495383220983 1.0 0.49559564702575704 0.4796832730680145
GOTERM_BP_DIRECT GO:0043065~positive regulation of apoptotic process 29 1.691948658109685 0.041416519715210036 BCL2A1, FASLG, PTGS2, FGD2, IFIT2, RASSF2, CNR1, UBD, ANKRD1, CYP1B1, CTLA4, TNFRSF8, NTSR1, NGFR, WNT10B, SPINK2, ZBTB16, GZMA, LILRB1, PNMA3, S100B, TIAM1, SFRP1, IL6, SFRP2, LTA, MNDA, PDCD1, ARHGEF6 1112 300 16792 1.4597362110311751 1.0 0.49559564702575704 0.4796832730680145
GOTERM_BP_DIRECT GO:0008277~regulation of G-protein coupled receptor protein signaling pathway 7 0.40840140023337224 0.041483350845237306 RGS18, RGS4, ADCYAP1, RGS1, HOMER2, RAMP1, RASGRP4 1112 39 16792 2.710385537723667 1.0 0.49559564702575704 0.4796832730680145
GOTERM_BP_DIRECT GO:0010628~positive regulation of gene expression 26 1.5169194865810969 0.041616978043326466 CSF2, CSF1, PIK3CD, CD3E, RIMS2, LAMP3, CCL3, STAP1, NKX3-1, ZNF683, TFAP2A, FOXD1, OSR1, SLC11A1, LILRB1, POU3F1, P2RX7, OLFM1, MAPK11, IL6, IFNG, PLP1, CD28, CNTN1, IL7R, TLR2 1112 262 16792 1.498544675709814 1.0 0.49559564702575704 0.4796832730680145
GOTERM_BP_DIRECT GO:0045669~positive regulation of osteoblast differentiation 9 0.5250875145857643 0.043095650208011135 NPPC, WNT10B, IL6, SFRP2, WNT7B, IGF1, FGF2, TP63, LTF 1112 60 16792 2.265107913669065 1.0 0.509871913499976 0.493501163258621
GOTERM_BP_DIRECT GO:0050679~positive regulation of epithelial cell proliferation 9 0.5250875145857643 0.043095650208011135 TBX1, IL6, SFRP1, FGF7, NR4A3, CCL5, OSR1, C5AR1, IGF1 1112 60 16792 2.265107913669065 1.0 0.509871913499976 0.493501163258621
GOTERM_BP_DIRECT GO:0032088~negative regulation of NF-kappaB transcription factor activity 10 0.5834305717619603 0.04379251183866135 AIM2, PTGIS, GFI1, NR1H4, ACOD1, CYP1B1, NLRC3, FOXP3, HAVCR2, CMKLR1 1112 71 16792 2.126861890769075 1.0 0.5164398483497799 0.4998582176535876
GOTERM_BP_DIRECT GO:0002223~stimulatory C-type lectin receptor signaling pathway 13 0.7584597432905484 0.044492318206124384 FCER1G, ICAM3, PSMB9, CLEC4A, CLEC4C, KLRK1, CLEC4D, CLEC7A, CD209, CLEC6A, KLRC4-KLRK1, PLCG2, CLEC4E 1112 105 16792 1.8696128811236725 1.0 0.5230000243326363 0.5062077623000023
GOTERM_BP_DIRECT GO:0045776~negative regulation of blood pressure 6 0.3500583430571762 0.04502884176835853 CNR1, ADIPOQ, PTAFR, OPRL1, FFAR3, DRD5 1112 30 16792 3.0201438848920863 1.0 0.5259137801407002 0.5090279644775658
GOTERM_BP_DIRECT GO:0044344~cellular response to fibroblast growth factor stimulus 6 0.3500583430571762 0.04502884176835853 TBX1, SFRP1, POSTN, CXCL8, CCL5, CCL2 1112 30 16792 3.0201438848920863 1.0 0.5259137801407002 0.5090279644775658
GOTERM_BP_DIRECT GO:0046854~phosphatidylinositol phosphorylation 12 0.7001166861143524 0.04582012562336167 CD86, FGF7, TRAT1, LCK, CD19, CD80, CD28, PIK3CD, FGF2, PIK3R6, PIK3CG, PIK3R5 1112 94 16792 1.9277514158885658 1.0 0.533445807576773 0.5163181567846536
GOTERM_BP_DIRECT GO:0009967~positive regulation of signal transduction 9 0.5250875145857643 0.04684799656762802 FCRL2, CD80, SH2D1A, ADIPOQ, CLNK, STAP1, SLA, GATA3, SLA2 1112 61 16792 2.2279749970515392 1.0 0.5436754760905621 0.5262193754586751
GOTERM_BP_DIRECT GO:0051770~positive regulation of nitric-oxide synthase biosynthetic process 4 0.2333722287047841 0.05014554408480718 FCER2, CCL2, JAK2, TLR2 1112 13 16792 4.646375207526287 1.0 0.569253466183917 0.5509761183399219
GOTERM_BP_DIRECT GO:0033630~positive regulation of cell adhesion mediated by integrin 4 0.2333722287047841 0.05014554408480718 ZAP70, SFRP2, CCL21, NCKAP1L 1112 13 16792 4.646375207526287 1.0 0.569253466183917 0.5509761183399219
GOTERM_BP_DIRECT GO:0050806~positive regulation of synaptic transmission 4 0.2333722287047841 0.05014554408480718 LGI1, CCL2, SLC1A3, RETN 1112 13 16792 4.646375207526287 1.0 0.569253466183917 0.5509761183399219
GOTERM_BP_DIRECT GO:0051926~negative regulation of calcium ion transport 4 0.2333722287047841 0.05014554408480718 LILRB1, LILRB2, PTGS2, ICAM1 1112 13 16792 4.646375207526287 1.0 0.569253466183917 0.5509761183399219
GOTERM_BP_DIRECT GO:0007600~sensory perception 4 0.2333722287047841 0.05014554408480718 PNOC, PENK, TRPV2, OPRL1 1112 13 16792 4.646375207526287 1.0 0.569253466183917 0.5509761183399219
GOTERM_BP_DIRECT GO:0019372~lipoxygenase pathway 4 0.2333722287047841 0.05014554408480718 ALOX5AP, PTGS2, ALOXE3, ALOX15B 1112 13 16792 4.646375207526287 1.0 0.569253466183917 0.5509761183399219
GOTERM_BP_DIRECT GO:2000484~positive regulation of interleukin-8 secretion 4 0.2333722287047841 0.05014554408480718 CD2, FCN1, FFAR2, CD244 1112 13 16792 4.646375207526287 1.0 0.569253466183917 0.5509761183399219
GOTERM_BP_DIRECT GO:0043552~positive regulation of phosphatidylinositol 3-kinase activity 6 0.3500583430571762 0.050877495655228915 FGR, CCL21, FLT3, CCR7, CCL19, FGF2 1112 31 16792 2.922719888605245 1.0 0.5757689259865036 0.5572823825341379
GOTERM_BP_DIRECT GO:0046427~positive regulation of JAK-STAT cascade 5 0.29171528588098017 0.053675005910704204 IL10, IL6, CCL5, LEP, CYP1B1 1112 22 16792 3.431981687377371 1.0 0.5864520947013491 0.5676225406179084
GOTERM_BP_DIRECT GO:0002230~positive regulation of defense response to virus by host 5 0.29171528588098017 0.053675005910704204 AIM2, APOBEC3G, IL12B, LILRB1, IL12RB1 1112 22 16792 3.431981687377371 1.0 0.5864520947013491 0.5676225406179084
GOTERM_BP_DIRECT GO:0034394~protein localization to cell surface 5 0.29171528588098017 0.053675005910704204 FCN1, RIC3, PTPRU, FGF7, GPIHBP1 1112 22 16792 3.431981687377371 1.0 0.5864520947013491 0.5676225406179084
GOTERM_BP_DIRECT GO:0071320~cellular response to cAMP 8 0.4667444574095682 0.0540739117906176 WNT10B, KCNE1, ADIPOQ, PENK, PTAFR, AQP9, HCN2, PIK3CG 1112 52 16792 2.3231876037631434 1.0 0.5864520947013491 0.5676225406179084
GOTERM_BP_DIRECT GO:0002830~positive regulation of type 2 immune response 3 0.1750291715285881 0.05487929865344677 CD74, TNFSF4, IDO1 1112 6 16792 7.550359712230216 1.0 0.5864520947013491 0.5676225406179084
GOTERM_BP_DIRECT GO:0048525~negative regulation of viral process 3 0.1750291715285881 0.05487929865344677 APOBEC3G, APOBEC3H, LTF 1112 6 16792 7.550359712230216 1.0 0.5864520947013491 0.5676225406179084
GOTERM_BP_DIRECT GO:0043382~positive regulation of memory T cell differentiation 3 0.1750291715285881 0.05487929865344677 TNFSF4, IL12B, IL12RB1 1112 6 16792 7.550359712230216 1.0 0.5864520947013491 0.5676225406179084
GOTERM_BP_DIRECT GO:0045084~positive regulation of interleukin-12 biosynthetic process 3 0.1750291715285881 0.05487929865344677 IFNG, IRF1, LTB 1112 6 16792 7.550359712230216 1.0 0.5864520947013491 0.5676225406179084
GOTERM_BP_DIRECT GO:2000252~negative regulation of feeding behavior 3 0.1750291715285881 0.05487929865344677 MC4R, NPY2R, RETN 1112 6 16792 7.550359712230216 1.0 0.5864520947013491 0.5676225406179084
GOTERM_BP_DIRECT GO:0034105~positive regulation of tissue remodeling 3 0.1750291715285881 0.05487929865344677 IL21, IL12B, IL2 1112 6 16792 7.550359712230216 1.0 0.5864520947013491 0.5676225406179084
GOTERM_BP_DIRECT GO:0032914~positive regulation of transforming growth factor beta1 production 3 0.1750291715285881 0.05487929865344677 SERPINB7, FOXP3, CX3CL1 1112 6 16792 7.550359712230216 1.0 0.5864520947013491 0.5676225406179084
GOTERM_BP_DIRECT GO:0042503~tyrosine phosphorylation of Stat3 protein 3 0.1750291715285881 0.05487929865344677 IL21, OSM, JAK2 1112 6 16792 7.550359712230216 1.0 0.5864520947013491 0.5676225406179084
GOTERM_BP_DIRECT GO:0002819~regulation of adaptive immune response 3 0.1750291715285881 0.05487929865344677 IRF1, TNFSF4, CD48 1112 6 16792 7.550359712230216 1.0 0.5864520947013491 0.5676225406179084
GOTERM_BP_DIRECT GO:2000553~positive regulation of T-helper 2 cell cytokine production 3 0.1750291715285881 0.05487929865344677 IL6, RSAD2, GATA3 1112 6 16792 7.550359712230216 1.0 0.5864520947013491 0.5676225406179084
GOTERM_BP_DIRECT GO:0023041~neuronal signal transduction 3 0.1750291715285881 0.05487929865344677 OLFM1, NLGN1, KCNA1 1112 6 16792 7.550359712230216 1.0 0.5864520947013491 0.5676225406179084
GOTERM_BP_DIRECT GO:0061737~leukotriene signaling pathway 3 0.1750291715285881 0.05487929865344677 CYSLTR1, CYSLTR2, RGS1 1112 6 16792 7.550359712230216 1.0 0.5864520947013491 0.5676225406179084
GOTERM_BP_DIRECT GO:0009404~toxin metabolic process 3 0.1750291715285881 0.05487929865344677 FMO1, CYP1B1, FMO2 1112 6 16792 7.550359712230216 1.0 0.5864520947013491 0.5676225406179084
GOTERM_BP_DIRECT GO:0030816~positive regulation of cAMP metabolic process 3 0.1750291715285881 0.05487929865344677 CXCL10, CXCL11, CXCL9 1112 6 16792 7.550359712230216 1.0 0.5864520947013491 0.5676225406179084
GOTERM_BP_DIRECT GO:0060267~positive regulation of respiratory burst 3 0.1750291715285881 0.05487929865344677 IGHA1, IGHA2, JCHAIN 1112 6 16792 7.550359712230216 1.0 0.5864520947013491 0.5676225406179084
GOTERM_BP_DIRECT GO:0007259~JAK-STAT cascade 6 0.3500583430571762 0.057149509331266946 STAT1, IL31RA, STAT4, CCL2, JAK2, CCR2 1112 32 16792 2.8313848920863314 1.0 0.6089263508863648 0.5893752029572471
GOTERM_BP_DIRECT GO:0007409~axonogenesis 12 0.7001166861143524 0.058798601021010435 LINGO2, NKX2-8, SPTBN4, CCKAR, SLITRK2, PTPRZ1, EPYC, SLITRK4, BCL2, CCK, S100B, VAX2 1112 98 16792 1.849067684627808 1.0 0.6246708516634462 0.604614186009049
GOTERM_BP_DIRECT GO:0031640~killing of cells of other organism 4 0.2333722287047841 0.06077647055496986 GNLY, S100A12, APOL1, HAMP 1112 14 16792 4.3144912641315525 1.0 0.6327698820066004 0.6124531761353676
GOTERM_BP_DIRECT GO:0032461~positive regulation of protein oligomerization 4 0.2333722287047841 0.06077647055496986 AIM2, MMP1, CCK, JCHAIN 1112 14 16792 4.3144912641315525 1.0 0.6327698820066004 0.6124531761353676
GOTERM_BP_DIRECT GO:0001516~prostaglandin biosynthetic process 4 0.2333722287047841 0.06077647055496986 CD74, PTGIS, PTGDS, PTGS2 1112 14 16792 4.3144912641315525 1.0 0.6327698820066004 0.6124531761353676
GOTERM_BP_DIRECT GO:0010001~glial cell differentiation 4 0.2333722287047841 0.06077647055496986 GAP43, DNER, FGF2, PHOX2B 1112 14 16792 4.3144912641315525 1.0 0.6327698820066004 0.6124531761353676
GOTERM_BP_DIRECT GO:0045579~positive regulation of B cell differentiation 4 0.2333722287047841 0.06077647055496986 ZAP70, BTK, CD27, NCKAP1L 1112 14 16792 4.3144912641315525 1.0 0.6327698820066004 0.6124531761353676
GOTERM_BP_DIRECT GO:0071354~cellular response to interleukin-6 4 0.2333722287047841 0.06077647055496986 SELPLG, PTGIS, CCL2, HAMP 1112 14 16792 4.3144912641315525 1.0 0.6327698820066004 0.6124531761353676
GOTERM_BP_DIRECT GO:0031529~ruffle organization 4 0.2333722287047841 0.06077647055496986 CSF1R, CCL21, PLEK, CCR7 1112 14 16792 4.3144912641315525 1.0 0.6327698820066004 0.6124531761353676
GOTERM_BP_DIRECT GO:0034765~regulation of ion transmembrane transport 13 0.7584597432905484 0.06306614773176111 KCNJ5, KCNJ10, KCND2, HVCN1, KCNA1, KCNK13, KCNA3, KCNJ15, CYBB, CACNG6, KCNQ2, KCNQ5, HCN2 1112 111 16792 1.768552725387258 1.0 0.6547380123491097 0.6337159631051893
GOTERM_BP_DIRECT GO:0000165~MAPK cascade 25 1.4585764294049008 0.0660462186255304 SPTBN4, CSF2, IL5RA, CSF2RB, RASAL3, FGF2, RASGRP1, RASGRP4, SPTA1, FGF7, CCL5, CCL3, CCL2, JAK2, CCR5, JAK3, IL31RA, MAPK8IP2, GFRA2, MAPK12, IL2, PSMB9, MAPK11, IL2RA, IL2RB 1112 262 16792 1.440908342028667 1.0 0.6837284678165703 0.661775605375698
GOTERM_BP_DIRECT GO:0019731~antibacterial humoral response 7 0.40840140023337224 0.06816467366057552 IGHM, BPIFA1, SEMG2, IGHA1, IGHA2, JCHAIN, LTF 1112 44 16792 2.4023871811641597 1.0 0.7036602572780091 0.6810674334301695
GOTERM_BP_DIRECT GO:0030099~myeloid cell differentiation 5 0.29171528588098017 0.07032481573273446 IFI16, GFI1, ZBTB16, CLEC5A, RASGRP4 1112 24 16792 3.1459832134292567 1.0 0.7239085551697299 0.7006656075970464
GOTERM_BP_DIRECT GO:0048485~sympathetic nervous system development 4 0.2333722287047841 0.07236015479087896 NTRK1, GATA3, PHOX2B, TP63 1112 15 16792 4.026858513189449 1.0 0.7300528993371871 0.7066126717788854
GOTERM_BP_DIRECT GO:0048714~positive regulation of oligodendrocyte differentiation 4 0.2333722287047841 0.07236015479087896 TENM4, CXCR4, OLIG2, TLR2 1112 15 16792 4.026858513189449 1.0 0.7300528993371871 0.7066126717788854
GOTERM_BP_DIRECT GO:0030502~negative regulation of bone mineralization 4 0.2333722287047841 0.07236015479087896 SRGN, GREM1, CCR1, CCL3 1112 15 16792 4.026858513189449 1.0 0.7300528993371871 0.7066126717788854
GOTERM_BP_DIRECT GO:0006112~energy reserve metabolic process 4 0.2333722287047841 0.07236015479087896 MC4R, ADRB3, LEP, GFPT2 1112 15 16792 4.026858513189449 1.0 0.7300528993371871 0.7066126717788854
GOTERM_BP_DIRECT GO:0014049~positive regulation of glutamate secretion 3 0.1750291715285881 0.07352618387945874 P2RX7, CCK, NTSR1 1112 7 16792 6.471736896197329 1.0 0.7300528993371871 0.7066126717788854
GOTERM_BP_DIRECT GO:0050861~positive regulation of B cell receptor signaling pathway 3 0.1750291715285881 0.07352618387945874 PRKCB, NFAM1, STAP1 1112 7 16792 6.471736896197329 1.0 0.7300528993371871 0.7066126717788854
GOTERM_BP_DIRECT GO:0001818~negative regulation of cytokine production 3 0.1750291715285881 0.07352618387945874 GPNMB, SLC11A1, BTK 1112 7 16792 6.471736896197329 1.0 0.7300528993371871 0.7066126717788854
GOTERM_BP_DIRECT GO:0045869~negative regulation of single stranded viral RNA replication via double stranded DNA intermediate 3 0.1750291715285881 0.07352618387945874 APOBEC3D, APOBEC3G, APOBEC3H 1112 7 16792 6.471736896197329 1.0 0.7300528993371871 0.7066126717788854
GOTERM_BP_DIRECT GO:0035360~positive regulation of peroxisome proliferator activated receptor signaling pathway 3 0.1750291715285881 0.07352618387945874 PTGIS, LEP, ALOX15B 1112 7 16792 6.471736896197329 1.0 0.7300528993371871 0.7066126717788854
GOTERM_BP_DIRECT GO:0002455~humoral immune response mediated by circulating immunoglobulin 3 0.1750291715285881 0.07352618387945874 HLA-DRB5, HLA-DRB1, HLA-DQB1 1112 7 16792 6.471736896197329 1.0 0.7300528993371871 0.7066126717788854
GOTERM_BP_DIRECT GO:2000427~positive regulation of apoptotic cell clearance 3 0.1750291715285881 0.07352618387945874 C3, C4A, CCL2 1112 7 16792 6.471736896197329 1.0 0.7300528993371871 0.7066126717788854
GOTERM_BP_DIRECT GO:0032609~interferon-gamma production 3 0.1750291715285881 0.07352618387945874 EOMES, ITK, LILRB1 1112 7 16792 6.471736896197329 1.0 0.7300528993371871 0.7066126717788854
GOTERM_BP_DIRECT GO:0007127~meiosis I 3 0.1750291715285881 0.07352618387945874 M1AP, MEI1, SCIMP 1112 7 16792 6.471736896197329 1.0 0.7300528993371871 0.7066126717788854
GOTERM_BP_DIRECT GO:0030168~platelet activation 13 0.7584597432905484 0.07793601711504028 CD40, FCER1G, PRKCB, PIK3R6, PIK3CG, PIK3R5, TREML1, IL6, CD40LG, LCK, SAA1, PLCG2, LCP2 1112 115 16792 1.7070378479824837 1.0 0.7717359955630619 0.746957424904204
GOTERM_BP_DIRECT GO:0007612~learning 8 0.4667444574095682 0.08082447812496721 JPH4, NLGN4X, PRKAR2B, ELAVL4, SORCS3, PTGS2, NTSR1, DRD5 1112 57 16792 2.119399217468131 1.0 0.796253896176895 0.7706881152074392
GOTERM_BP_DIRECT GO:0045165~cell fate commitment 7 0.40840140023337224 0.08108330095326209 WNT10B, GAP43, WNT7B, GATA5, GAS1, GATA3, WNT1 1112 46 16792 2.2979355645918047 1.0 0.796253896176895 0.7706881152074392
GOTERM_BP_DIRECT GO:0043066~negative regulation of apoptotic process 39 2.2753792298716453 0.08119931157956511 BLK, CSF1R, FCMR, BCL2A1, AIF1, IFIT3, COMP, CHST11, CLEC5A, PROK2, CD38, NCKAP1L, TP63, NTSR1, IL10, TFAP2A, NGFR, CD74, SERPINB2, OSR1, TNFRSF18, SPHK1, IL31RA, NR1H4, IGF1, IL2, GREM1, HCK, SFRP1, IL6, CD40LG, LEP, IL2RB, BCL2, CD27, AIPL1, PDCD1, BIRC3, LTF 1112 455 16792 1.294347379…
GOTERM_BP_DIRECT GO:0001503~ossification 10 0.5834305717619603 0.08128607282596184 NPPC, RASSF2, COL11A1, MGP, BCL2, SPP1, SOST, CHRDL2, CHRDL1, LTF 1112 80 16792 1.8875899280575539 1.0 0.796253896176895 0.7706881152074392
GOTERM_BP_DIRECT GO:0035458~cellular response to interferon-beta 4 0.2333722287047841 0.08484323017314463 AIM2, STAT1, IRF1, ACOD1 1112 16 16792 3.775179856115108 1.0 0.8288705918255739 0.8022575678838636
GOTERM_BP_DIRECT GO:0043085~positive regulation of catalytic activity 10 0.5834305717619603 0.08636973072465287 PSAPL1, CLPS, NCF1, GMFG, ALOX5AP, APOC1, BCL2, NCF1B, NCF1C, PIK3CG 1112 81 16792 1.8642863486988186 1.0 0.8399191601554974 0.8129513934874971
GOTERM_BP_DIRECT GO:0010043~response to zinc ion 6 0.3500583430571762 0.08643514957692414 P2RX7, VCAM1, HVCN1, KRT14, HAMP, S100A8 1112 36 16792 2.5167865707434056 1.0 0.8399191601554974 0.8129513934874971
GOTERM_BP_DIRECT GO:0007193~adenylate cyclase-inhibiting G-protein coupled receptor signaling pathway 7 0.40840140023337224 0.08801970751001711 P2RY12, PSAPL1, RGS1, NPY2R, OPRL1, FFAR3, MCHR1 1112 47 16792 2.24904331853666 1.0 0.8530420589534639 0.8256529478399743
GOTERM_BP_DIRECT GO:0071300~cellular response to retinoic acid 9 0.5250875145857643 0.09015893191737293 TBX1, WNT10B, OSR1, LEP, WNT7B, SERPINF1, KRT13, CCL2, RORB 1112 70 16792 1.9415210688591986 1.0 0.8635500663652309 0.8358235686251836
GOTERM_BP_DIRECT GO:0009612~response to mechanical stimulus 8 0.4667444574095682 0.09333064027616497 P2RX7, POSTN, STAT1, CCL2, SOST, RETN, KCNK2, DCN 1112 59 16792 2.0475551761980246 1.0 0.8635500663652309 0.8358235686251836
GOTERM_BP_DIRECT GO:0043406~positive regulation of MAP kinase activity 8 0.4667444574095682 0.09333064027616497 CD40, FLT3, S100A12, FGF2, RASGRP1, PIK3R6, PIK3CG, PIK3R5 1112 59 16792 2.0475551761980246 1.0 0.8635500663652309 0.8358235686251836
GOTERM_BP_DIRECT GO:0015939~pantothenate metabolic process 3 0.1750291715285881 0.09384353081246746 VNN1, VNN2, VNN3 1112 8 16792 5.662769784172663 1.0 0.8635500663652309 0.8358235686251836
GOTERM_BP_DIRECT GO:0002221~pattern recognition receptor signaling pathway 3 0.1750291715285881 0.09384353081246746 MARCO, PGLYRP2, CLEC7A 1112 8 16792 5.662769784172663 1.0 0.8635500663652309 0.8358235686251836
GOTERM_BP_DIRECT GO:0001766~membrane raft polarization 3 0.1750291715285881 0.09384353081246746 CD2, MAL, DOCK2 1112 8 16792 5.662769784172663 1.0 0.8635500663652309 0.8358235686251836
GOTERM_BP_DIRECT GO:0034138~toll-like receptor 3 signaling pathway 3 0.1750291715285881 0.09384353081246746 COLEC12, CD86, HAVCR2 1112 8 16792 5.662769784172663 1.0 0.8635500663652309 0.8358235686251836
GOTERM_BP_DIRECT GO:0032731~positive regulation of interleukin-1 beta production 3 0.1750291715285881 0.09384353081246746 AIM2, IFI16, JAK2 1112 8 16792 5.662769784172663 1.0 0.8635500663652309 0.8358235686251836
GOTERM_BP_DIRECT GO:0060100~positive regulation of phagocytosis, engulfment 3 0.1750291715285881 0.09384353081246746 STAP1, NCKAP1L, CD36 1112 8 16792 5.662769784172663 1.0 0.8635500663652309 0.8358235686251836
GOTERM_BP_DIRECT GO:0045348~positive regulation of MHC class II biosynthetic process 3 0.1750291715285881 0.09384353081246746 IL10, CIITA, IFNG 1112 8 16792 5.662769784172663 1.0 0.8635500663652309 0.8358235686251836
GOTERM_BP_DIRECT GO:0060346~bone trabecula formation 3 0.1750291715285881 0.09384353081246746 WNT10B, SFRP1, MMP2 1112 8 16792 5.662769784172663 1.0 0.8635500663652309 0.8358235686251836
GOTERM_BP_DIRECT GO:0002456~T cell mediated immunity 3 0.1750291715285881 0.09384353081246746 BTN3A3, FOXP3, MYO1G 1112 8 16792 5.662769784172663 1.0 0.8635500663652309 0.8358235686251836
GOTERM_BP_DIRECT GO:0050863~regulation of T cell activation 3 0.1750291715285881 0.09384353081246746 CD4, SIT1, CCL5 1112 8 16792 5.662769784172663 1.0 0.8635500663652309 0.8358235686251836
GOTERM_BP_DIRECT GO:0033689~negative regulation of osteoblast proliferation 3 0.1750291715285881 0.09384353081246746 GREM1, SFRP1, BCL2 1112 8 16792 5.662769784172663 1.0 0.8635500663652309 0.8358235686251836
GOTERM_BP_DIRECT GO:0002438~acute inflammatory response to antigenic stimulus 3 0.1750291715285881 0.09384353081246746 CD6, IL31RA, ICAM1 1112 8 16792 5.662769784172663 1.0 0.8635500663652309 0.8358235686251836
GOTERM_BP_DIRECT GO:0034695~response to prostaglandin E 3 0.1750291715285881 0.09384353081246746 CCL21, CCR7, CCL19 1112 8 16792 5.662769784172663 1.0 0.8635500663652309 0.8358235686251836
GOTERM_BP_DIRECT GO:0019064~fusion of virus membrane with host plasma membrane 3 0.1750291715285881 0.09384353081246746 CD4, CXCR4, CCR5 1112 8 16792 5.662769784172663 1.0 0.8635500663652309 0.8358235686251836
GOTERM_BP_DIRECT GO:0031666~positive regulation of lipopolysaccharide-mediated signaling pathway 3 0.1750291715285881 0.09384353081246746 CD180, LY86, LY96 1112 8 16792 5.662769784172663 1.0 0.8635500663652309 0.8358235686251836
GOTERM_BP_DIRECT GO:0034115~negative regulation of heterotypic cell-cell adhesion 3 0.1750291715285881 0.09384353081246746 IL10, IL1RN, ADIPOQ 1112 8 16792 5.662769784172663 1.0 0.8635500663652309 0.8358235686251836
GOTERM_BP_DIRECT GO:0045630~positive regulation of T-helper 2 cell differentiation 3 0.1750291715285881 0.09384353081246746 CD86, IL6, TNFSF4 1112 8 16792 5.662769784172663 1.0 0.8635500663652309 0.8358235686251836
GOTERM_BP_DIRECT GO:0071260~cellular response to mechanical stimulus 9 0.5250875145857643 0.09604673129150396 CD40, TNFSF14, IRF1, IL13, ANKRD1, TNFRSF8, TLR8, TLR7, PTGS2 1112 71 16792 1.9141757016921674 1.0 0.8808155242554857 0.8525346745469533
GOTERM_BP_DIRECT GO:0000187~activation of MAPK activity 12 0.7001166861143524 0.09620323234184502 P2RX7, MAPK11, CD74, PDE6G, C5AR1, SAA1, FPR1, PROK2, CXCR4, IGF1, FGF2, PROK1 1112 107 16792 1.6935386270422916 1.0 0.8808155242554857 0.8525346745469533
GOTERM_BP_DIRECT GO:0030336~negative regulation of cell migration 11 0.6417736289381564 0.09702547913059324 BST2, PTPRU, SFRP1, SFRP2, KRT16, ADIPOQ, SERPINE1, BCL2, CYP1B1, ALOX15B, CX3CL1 1112 95 16792 1.7485043544112078 1.0 0.8845070458427382 0.8561076703313222
GOTERM_BP_DIRECT GO:0006887~exocytosis 10 0.5834305717619603 0.09709188209031155 CCR1, SYT4, CCL8, CCL5, TNFAIP2, CCL3, MYO5A, VAMP5, ANK1, MYO1G 1112 83 16792 1.81936378607957 1.0 0.8845070458427382 0.8561076703313222
GOTERM_BP_DIRECT GO:0071310~cellular response to organic substance 4 0.2333722287047841 0.0981673547804017 EGR2, CALB1, TBX21, BCL2 1112 17 16792 3.5531104528142192 1.0 0.8920744160094359 0.8634320705996927
GOTERM_BP_DIRECT GO:0031069~hair follicle morphogenesis 5 0.29171528588098017 0.09960925925973761 FGF7, KRT17, KRT27, BCL2, TP63 1112 27 16792 2.796429523048228 1.0 0.9029257232400095 0.8739349686793396
