# Supplementary material for: High matrix metalloproteinase-2 expression predicts poor prognosis of colon adenocarcinoma and is associated with PD-L1 expression and lymphocyte infiltration
Source: PeerJ. 2025 Jun 30;13:e19550. doi: 10.7717/peerj.19550 (PMC12225630; doi:10.7717/peerj.19550)
Supplement: Supplemental Information 6 [file peerj-13-19550-s006.xlsx]

## Sheet: Sheet1
Category Term Count % PValue Genes List Total Pop Hits Pop Total Fold Enrichment Bonferroni Benjamini FDR
KEGG_PATHWAY hsa05150:Staphylococcus aureus infection 39 2.2753792298716453 3.5072930193130223E-31 C1QB, C1QA, SELPLG, ITGAM, CFH, C1S, C5AR1, PTAFR, ITGB2, FPR1, FPR3, FPR2, ITGAL, FCAR, ICAM1, C3, C4A, HLA-DMA, FCGR3A, HLA-DMB, FCGR3B, C3AR1, FCGR1A, HLA-DOA, HLA-DOB, HLA-DQA2, HLA-DQA1, HLA-DPA1, IL10, HLA-DRB5, SELP, FCGR2A, HLA-DPB1, HLA-DRA, FCGR2B, FCGR2C, HLA-DRB1, C1QC, HLA-DQB1 518 54 6…
KEGG_PATHWAY hsa04060:Cytokine-cytokine receptor interaction 78 4.550758459743291 6.420416738383295E-30 IL21, CXCL9, CD40, CSF2, CSF3R, CXCL8, CSF1, TNFRSF13B, CCL4L2, IL5RA, FASLG, TNFRSF13C, CXCL13, CXCL5, CX3CL1, TNFSF13B, IL18RAP, IL12B, TNFRSF8, CCR8, CCR7, CCR5, CCR4, CCR2, IL10, TNFRSF18, IL13, IFNG, XCL2, LTA, LTB, IL9R, CSF1R, CCL13, CCL3L3, CXCR5, CXCR4, CSF2RB, CXCR6, CCL8, CCL7, CXCR1…
KEGG_PATHWAY hsa04672:Intestinal immune network for IgA production 29 1.691948658109685 2.878453596377896E-20 CD86, CD40, TNFRSF13B, CD80, CXCR4, TNFRSF13C, TNFSF13B, HLA-DMA, HLA-DMB, TNFRSF17, ITGB7, ICOS, HLA-DOA, HLA-DOB, HLA-DQA2, HLA-DQA1, HLA-DPA1, IL10, CCL25, HLA-DRB5, AICDA, IL2, IL6, CD40LG, HLA-DPB1, CD28, HLA-DRA, HLA-DRB1, HLA-DQB1 518 47 6879 8.193994906760864 6.793150487451834E-18…
KEGG_PATHWAY hsa04514:Cell adhesion molecules (CAMs) 49 2.8588098016336057 3.278390167101186E-20 CD86, CD40, ITGAM, CD80, ITGB2, ICAM3, ITGAL, ICAM1, SPN, CTLA4, ITGB7, HLA-DOA, HLA-DOB, HLA-DPA1, PDCD1LG2, CD8B, CLDN18, CD226, HLA-DQB1, CD274, NLGN1, SELPLG, HLA-DMA, HLA-DMB, ICOS, TIGIT, LRRC4C, HLA-DQA2, HLA-DQA1, CADM3, HLA-DRB5, NLGN4X, VCAM1, SELE, SELP, CD2, CD4, PTPRC, CD40LG, SELL, CD6, …
KEGG_PATHWAY hsa05323:Rheumatoid arthritis 36 2.100350058343057 1.3201094740386724E-17 CD86, CSF2, CXCL8, CSF1, CCL3L3, CD80, ITGB2, ITGAL, CXCL5, TNFSF13B, ICAM1, HLA-DMA, HLA-DMB, CTSL, CCL5, CCL3, CCL2, CTLA4, ACP5, HLA-DOA, HLA-DOB, HLA-DQA2, HLA-DQA1, HLA-DPA1, HLA-DRB5, MMP1, IL6, IFNG, HLA-DPB1, CD28, HLA-DRA, LTB, ATP6V0D2, HLA-DRB1, HLA-DQB1, TLR2 518 88 6879 5.432695682695683 3.11545835…
KEGG_PATHWAY hsa05140:Leishmaniasis 32 1.8669778296382729 4.0382448198966414E-17 ITGAM, NCF1, NCF2, ITGB2, PTGS2, C3, HLA-DMA, FCGR3A, HLA-DMB, FCGR3B, IL12B, JAK2, FCGR1A, HLA-DOA, HLA-DOB, HLA-DQA2, HLA-DQA1, HLA-DPA1, IL10, HLA-DRB5, CR1, STAT1, MAPK12, MAPK11, FCGR2A, IFNG, HLA-DPB1, HLA-DRA, FCGR2C, HLA-DRB1, HLA-DQB1, TLR2 518 71 6879 5.985317309260971 9.530257774956073E-15 1.58837629582601…
KEGG_PATHWAY hsa04640:Hematopoietic cell lineage 35 2.042007001166861 7.383220971508788E-17 CSF1R, CSF2, CSF3R, ITGAM, CSF1, FLT3, IL5RA, CD3G, CD1C, CD3E, CD1B, CD3D, CD19, CD38, CD37, CD14, CD36, FCGR1A, CD33, CR2, HLA-DRB5, CR1, CD2, FCER2, CD4, IL6, CD8B, IL2RA, CD7, HLA-DRA, IL7R, MS4A1, CD22, HLA-DRB1, IL9R 518 87 6879 5.342497670083877 2.6201263381153694E-14 2.4892002132515342E-15 2.067301…
KEGG_PATHWAY hsa05321:Inflammatory bowel disease (IBD) 30 1.7502917152858808 1.2517352766551276E-16 IL21, HLA-DMA, HLA-DMB, IL18RAP, TBX21, IL21R, STAT4, IL12B, IL12RB1, HLA-DOA, HLA-DOB, HLA-DQA2, HLA-DQA1, HLA-DPA1, IL10, HLA-DRB5, STAT1, IL13, NFATC1, FOXP3, IL2, IL6, MAF, IFNG, HLA-DPB1, HLA-DRA, IL18R1, HLA-DRB1, HLA-DQB1, TLR2 518 64 6879 6.224963803088803 2.6201263381153694E-14 3.692619066…
KEGG_PATHWAY hsa05330:Allograft rejection 23 1.3418903150525088 3.731519335608276E-16 IL10, CD86, HLA-DRB5, CD40, CD80, PRF1, FASLG, IL2, HLA-DMA, HLA-DMB, CD40LG, IFNG, HLA-DPB1, CD28, IL12B, HLA-DRA, HLA-DOA, HLA-DOB, HLA-DQA2, HLA-DQA1, HLA-DRB1, HLA-DPA1, HLA-DQB1 518 37 6879 8.255087133465512 7.860379014346108E-14 8.87338648420944E-15 7.369422673326484E-15
KEGG_PATHWAY hsa04062:Chemokine signaling pathway 51 2.9754959159859977 3.7599095272073896E-16 ITK, CXCL9, CXCL8, NCF1, CCL4L2, PIK3CD, CXCL13, PIK3CG, CXCL5, CX3CL1, GNGT2, CCR8, CCR7, JAK2, CCR5, JAK3, CCR4, CCR2, FGR, TIAM1, HCK, XCL2, DOCK2, CCL13, CCL3L3, CXCR5, WAS, CXCR4, CXCR6, RASGRP2, PIK3R5, CCL8, CCL7, CXCR1, CCL5, CCL4, CCL3, CCL2, CCL1, CCL19, CCL18, CCL17, CCR1, CCL25, CCL23, XCR1,…
KEGG_PATHWAY hsa04612:Antigen processing and presentation 32 1.8669778296382729 4.2161246639340516E-16 CIITA, KIR2DL1, IFI30, KIR2DL3, KIR2DL4, HLA-DMA, HLA-DMB, CTSL, KLRC1, HLA-DOA, HLA-DOB, HLA-DQA2, HLA-DQA1, HLA-DPA1, CD74, HLA-DRB5, KLRC2, KLRC3, KLRC4, KIR2DS4, TAP1, KIR3DL1, KIR3DL2, KIR3DL3, CD4, IFNG, CD8B, HLA-DPB1, HLA-DRA, KLRD1, HLA-DRB1, HLA-DQB1 518 76 6879 5.591546433651697 1.048…
KEGG_PATHWAY hsa04380:Osteoclast differentiation 40 2.3337222870478413 1.8352244742991725E-14 LILRA6, CSF1R, SPI1, CSF1, NCF1, NCF2, SIRPG, PIK3CD, TREM2, LILRA1, LILRA2, SIRPB1, PIK3CG, LILRA4, PIK3R5, LILRA5, FCGR3A, FCGR3B, PLCG2, ACP5, FCGR1A, STAT1, CYBB, NFATC1, LILRB1, LILRB2, LILRB3, LILRB4, MAPK12, LILRB5, OSCAR, MAPK11, TYROBP, FCGR2A, IFNG, LCK, BTK, LCP2, FCGR2B, FCGR2C 518 131 6879 4…
KEGG_PATHWAY hsa05152:Tuberculosis 47 2.7421236872812136 2.1759921363447696E-14 CIITA, ITGAM, ITGB2, LSP1, C3, HLA-DMA, FCGR3A, HLA-DMB, FCGR3B, CLEC7A, MRC1, ITGAX, IL12B, CD14, JAK2, FCGR1A, HLA-DOA, HLA-DOB, HLA-DQA2, HLA-DQA1, HLA-DPA1, IL10, CD74, HLA-DRB5, FCER1G, CR1, STAT1, IL10RA, SPHK1, MAPK12, TLR1, MAPK11, IL6, FCGR2A, IFNG, CD209, BCL2, HLA-DPB1, HLA-DRA, TLR6, CLEC4E, FCGR2B, FCGR2C…
KEGG_PATHWAY hsa05332:Graft-versus-host disease 20 1.1668611435239207 9.72173886351275E-14 CD86, HLA-DRB5, CD80, PRF1, FASLG, IL2, HLA-DMA, IL6, HLA-DMB, IFNG, HLA-DPB1, CD28, HLA-DRA, HLA-DOA, HLA-DOB, HLA-DQA2, HLA-DQA1, HLA-DRB1, HLA-DPA1, HLA-DQB1 518 33 6879 8.048438048438047 2.2952306721890636E-11 1.6388074084207207E-12 1.361043440891785E-12
KEGG_PATHWAY hsa04650:Natural killer cell mediated cytotoxicity 37 2.1586931155192532 2.6131033370121324E-13 CSF2, ITGB2, PRF1, PIK3CD, FASLG, KIR2DL1, ITGAL, KIR2DL3, KIR2DL4, PIK3CG, PIK3R5, ICAM1, FCGR3A, KLRK1, FCGR3B, KLRC4-KLRK1, PLCG2, FCER1G, PRKCB, KIR2DS4, SH2D1A, SH2D1B, NFATC1, NCR1, NCR2, ZAP70, NCR3, TYROBP, IFNG, LCK, CD48, LCP2, KLRD1, CD247, ULBP2, HCST, CD244 518 122 6879 4.0275…
KEGG_PATHWAY hsa04145:Phagosome 41 2.3920653442240374 4.736784042241461E-13 COLEC12, ITGAM, NCF1, NCF2, ITGB2, THBS2, FCAR, C3, COMP, HLA-DMA, FCGR3A, HLA-DMB, FCGR3B, CLEC7A, CTSL, MRC1, OLR1, CD14, CD36, FCGR1A, HLA-DOA, HLA-DOB, HLA-DQA2, HLA-DQA1, HLA-DPA1, MSR1, HLA-DRB5, TAP1, TUBB4A, MARCO, FCGR2A, CD209, HLA-DPB1, HLA-DRA, TLR6, FCGR2B, FCGR2C, ATP6V0D2, HLA-DRB1, HLA-DQB1, TLR2 518 150 6…
KEGG_PATHWAY hsa04940:Type I diabetes mellitus 21 1.2252042007001167 2.4976737642337846E-12 CD86, HLA-DRB5, CD80, PRF1, FASLG, IL2, HLA-DMA, HLA-DMB, IFNG, HLA-DPB1, CD28, LTA, IL12B, HLA-DRA, HLA-DOA, HLA-DOB, HLA-DQA2, HLA-DQA1, HLA-DRB1, HLA-DPA1, HLA-DQB1 518 42 6879 6.639961389961391 5.894498222858147E-10 3.467358872701019E-11 2.8796709281754222E-11
KEGG_PATHWAY hsa05310:Asthma 18 1.0501750291715286 2.887589827980106E-12 IL10, HLA-DRB5, CD40, FCER1G, IL13, HLA-DMA, HLA-DMB, CD40LG, HLA-DPB1, HLA-DRA, HLA-DOA, MS4A2, HLA-DOB, HLA-DQA2, HLA-DQA1, HLA-DRB1, HLA-DPA1, HLA-DQB1 518 30 6879 7.967953667953669 6.814686592804264E-10 3.785951107796139E-11 3.1442644793561154E-11
KEGG_PATHWAY hsa05340:Primary immunodeficiency 19 1.1085180863477246 3.122257376245966E-12 CIITA, CD40, TNFRSF13B, TAP1, TNFRSF13C, CD3E, CD3D, AICDA, CD79A, ZAP70, CD4, PTPRC, CD40LG, CD8B, LCK, CD19, BTK, IL7R, ICOS 518 34 6879 7.421133318192142 7.368581300681853E-10 3.878172319968673E-11 3.220854977601102E-11
KEGG_PATHWAY hsa05320:Autoimmune thyroid disease 23 1.3418903150525088 3.8831550953562365E-12 IL10, CD86, HLA-DRB5, CD40, CD80, PRF1, FASLG, IL2, TSHR, HLA-DMA, HLA-DMB, CD40LG, HLA-DPB1, CD28, HLA-DRA, CTLA4, HLA-DOA, HLA-DOB, HLA-DQA2, HLA-DQA1, HLA-DRB1, HLA-DPA1, HLA-DQB1 518 52 6879 5.873811998811999 9.164153880192316E-10 4.582123012520359E-11 3.805491993449112E-11
KEGG_PATHWAY hsa05144:Malaria 22 1.2835472578763127 8.948954865066726E-12 IL10, CD40, CR1, VCAM1, CXCL8, KLRB1, ITGB2, ITGAL, THBS2, SELE, ICAM1, SELP, COMP, IL6, KLRK1, CD40LG, IFNG, KLRC4-KLRK1, CCL2, ACKR1, CD36, TLR2 518 49 6879 5.962414309353084 2.1119528348378935E-9 1.0056920705503558E-10 8.352357874062279E-11
KEGG_PATHWAY hsa05416:Viral myocarditis 23 1.3418903150525088 3.5028461637655496E-11 CD86, HLA-DRB5, CD40, CD80, ITGB2, PRF1, ITGAL, ICAM1, HLA-DMA, HLA-DMB, CD40LG, HLA-DPB1, CD28, HLA-DRA, HLA-DOA, HLA-DOB, HLA-DQA2, SGCG, HLA-DQA1, MYH6, HLA-DRB1, HLA-DPA1, HLA-DQB1 518 57 6879 5.358565332249543 8.26670820686104E-9 3.7575986120394075E-10 3.120717491354762E-10
KEGG_PATHWAY hsa05142:Chagas disease (American trypanosomiasis) 28 1.633605600933489 6.234124469256465E-9 C1QB, C1QA, CXCL8, CCL3L3, SERPINE1, PIK3CD, CD3G, FASLG, CD3E, CD3D, PIK3CG, PIK3R5, C3, CCL5, CCL3, IL12B, CCL2, IL10, MAPK12, IL2, MAPK11, IL6, IFNG, PPP2R2B, CD247, TLR6, C1QC, TLR2 518 104 6879 3.5753638253638256 1.4712522898863156E-6 6.396753803237069E-8 5.312558243366379E-8
KEGG_PATHWAY hsa04620:Toll-like receptor signaling pathway 28 1.633605600933489 9.758279218417066E-9 CD86, CXCL9, CD40, CXCL8, CCL4L2, CCL3L3, CD80, LY96, PIK3CD, PIK3CG, PIK3R5, CCL5, CCL4, CCL3, SPP1, IL12B, CD14, STAT1, MAPK12, TLR1, MAPK11, CXCL10, CXCL11, IL6, TLR8, TLR7, TLR6, TLR2 518 106 6879 3.50790413054564 2.3029512470351676E-6 9.595641231443449E-8 7.96926136170727E-8
KEGG_PATHWAY hsa04660:T cell receptor signaling pathway 27 1.575262543757293 1.1569678275808849E-8 ITK, CSF2, PIK3CD, CD3G, CD3E, RASGRP1, CD3D, PIK3CG, PIK3R5, CTLA4, ICOS, IL10, NFATC1, MAPK12, IL2, MAPK11, ZAP70, CD4, PTPRC, CD40LG, IFNG, CD8B, LCK, CD28, LCP2, PDCD1, CD247 518 100 6879 3.5855791505791506 2.730440373244214E-6 1.0921776292363553E-7 9.070627768234137E-8
KEGG_PATHWAY hsa04064:NF-kappa B signaling pathway 25 1.4585764294049008 1.2059503393097481E-8 CCL13, CD40, CXCL8, BCL2A1, CCL4L2, LY96, TNFRSF13C, PTGS2, TNFSF13B, ICAM1, CCL4, PLCG2, CCL19, CD14, VCAM1, CCL21, TNFSF14, ZAP70, CD40LG, LCK, LTA, BCL2, BTK, LTB, BIRC3 518 87 6879 3.8160697643456265 2.8460387686557453E-6 1.0946318464503867E-7 9.091010250181178E-8
KEGG_PATHWAY hsa05145:Toxoplasmosis 28 1.633605600933489 2.302419046681043E-8 CIITA, CD40, LY96, HLA-DMA, HLA-DMB, IL12B, JAK2, CCR5, HLA-DOA, HLA-DOB, HLA-DQA2, HLA-DQA1, HLA-DPA1, IL10, HLA-DRB5, STAT1, IL10RA, MAPK12, MAPK11, CD40LG, IFNG, BCL2, HLA-DPB1, HLA-DRA, HLA-DRB1, BIRC3, HLA-DQB1, TLR2 518 110 6879 3.380343980343981 5.433694244549869E-6 2.012484796358245E-7 1.671385678331424E-7
KEGG_PATHWAY hsa05322:Systemic lupus erythematosus 31 1.8086347724620768 3.701428277039436E-8 C1QB, CD86, C1QA, CD40, C1S, CD80, C3, C4A, HLA-DMA, FCGR3A, HLA-DMB, FCGR3B, C7, CTSG, FCGR1A, HLA-DOA, HLA-DOB, HLA-DQA2, HLA-DQA1, HLA-DPA1, IL10, HLA-DRB5, FCGR2A, CD40LG, IFNG, HLA-DPB1, CD28, HLA-DRA, HLA-DRB1, C1QC, HLA-DQB1 518 134 6879 3.0722209416239266 8.735332737375145E-6 3.119775262076096E-7…
KEGG_PATHWAY hsa05164:Influenza A 34 1.9836639439906651 5.075666402214753E-7 CIITA, CXCL8, PIK3CD, FASLG, PIK3CG, PIK3R5, ICAM1, HLA-DMA, NXF3, HLA-DMB, CCL5, IL12B, CCL2, JAK2, HLA-DOA, HLA-DOB, HLA-DQA2, HLA-DQA1, HLA-DPA1, HLA-DRB5, RSAD2, PRKCB, STAT1, MAPK12, MAPK11, CXCL10, IL6, IFNG, OAS2, HLA-DPB1, HLA-DRA, TLR7, HLA-DRB1, HLA-DQB1 518 174 6879 2.5949274397550255 1.197785834766707E-4 4.13…
KEGG_PATHWAY hsa05133:Pertussis 19 1.1085180863477246 7.334734471414429E-6 IL10, C1QB, C1QA, ITGAM, CXCL8, C1S, ITGB2, LY96, CXCL5, MAPK12, C3, MAPK11, C4A, IL6, IRF1, SERPING1, IL12B, CD14, C1QC 518 75 6879 3.364247104247105 0.0017295063607025707 5.7699911175126836E-5 4.792026521324094E-5
KEGG_PATHWAY hsa04630:Jak-STAT signaling pathway 28 1.633605600933489 8.031434013734204E-6 IL21, CSF2, CSF3R, PIK3CD, IL5RA, CSF2RB, PIK3CG, IL22RA2, PIK3R5, IL21R, STAT4, IL12B, JAK2, IL12RB1, JAK3, IL10, STAT1, IL10RA, IL13, OSM, IL2, IL6, IFNG, IL2RA, LEP, IL2RB, IL7R, IL9R 518 145 6879 2.564398881640261 0.0018936308532045976 6.114252991100878E-5 5.0779389248125936E-5
KEGG_PATHWAY hsa05166:HTLV-I infection 39 2.2753792298716453 2.755286798916906E-5 CD40, CSF2, SPI1, ITGB2, PIK3CD, CD3G, TNFRSF13C, CD3E, ITGAL, CD3D, PIK3CG, PIK3R5, ICAM1, HLA-DMA, HLA-DMB, HLA-DOA, WNT1, JAK3, HLA-DOB, HLA-DQA2, HLA-DQA1, HLA-DPA1, WNT10B, EGR2, HLA-DRB5, VCAM1, WNT7B, NFATC1, IL2, IL6, MRAS, LCK, IL2RA, IL2RB, LTA, HLA-DPB1, HLA-DRA, HLA-DRB1, HLA-DQB1 518 254 6879 2.03904326…
KEGG_PATHWAY hsa05168:Herpes simplex infection 31 1.8086347724620768 3.4590986034866014E-5 FASLG, CFP, IFIT1, C3, HLA-DMA, NXF3, HLA-DMB, CCL5, IL12B, CCL2, JAK2, HLA-DOA, HLA-DOB, HLA-DQA2, HLA-DQA1, HLA-DPA1, CD74, HLA-DRB5, TNFSF14, STAT1, TAP1, PILRA, IL6, IFNG, OAS2, LTA, HLA-DPB1, HLA-DRA, HLA-DRB1, HLA-DQB1, TLR2 518 183 6879 2.2496044053421103 0.00813038209485073 2.4737796073419333E-4 2.0…
KEGG_PATHWAY hsa05162:Measles 25 1.4585764294049008 4.371390661564656E-5 PIK3CD, CD3G, FASLG, CD3E, CD3D, PIK3CG, PIK3R5, IL12B, JAK2, JAK3, SLAMF1, STAT1, IL13, SH2D1A, IL2, IL6, IFNG, OAS2, CD209, IL2RA, IL2RB, CD28, TLR7, FCGR2B, TLR2 518 133 6879 2.4962260864516503 0.010263672766180454 3.0342594003801733E-4 2.519978146078449E-4
KEGG_PATHWAY hsa05169:Epstein-Barr virus infection 23 1.3418903150525088 9.147736090832707E-5 CR2, HLA-DRB5, CD40, PIK3CD, ITGAL, PIK3CG, MAPK12, PIK3R5, ICAM1, SPN, MAPK11, FCER2, CD19, HLA-DPB1, BCL2, PLCG2, HLA-DRA, JAK3, HLA-DQA2, HLA-DQA1, HLA-DRB1, HLA-DPA1, HLA-DQB1 518 122 6879 2.5035919994936386 0.021358256480628834 6.16818776410434E-4 5.122732210866316E-4
KEGG_PATHWAY hsa05143:African trypanosomiasis 11 0.6417736289381564 1.0026710455178567E-4 IL10, IL6, VCAM1, IFNG, PRKCB, IL12B, FASLG, IDO2, SELE, IDO1, ICAM1 518 33 6879 4.426640926640927 0.023386420976996725 6.573065742839282E-4 5.458986803374997E-4
KEGG_PATHWAY hsa04080:Neuroactive ligand-receptor interaction 39 2.2753792298716453 1.8467354410908732E-4 ADCYAP1R1, NPY2R, C5AR1, PTAFR, FPR1, OPRL1, FPR3, FPR2, MCHR1, MC4R, P2RY8, CYSLTR1, CYSLTR2, HTR7, CCKAR, CNR2, HRH2, CNR1, HRH4, C3AR1, CTSG, S1PR4, NTSR1, DRD5, PTGDR, P2RY13, GABRP, P2RY10, GRID2, GZMA, TAAR1, SSTR3, GABRG2, TSHR, P2RX7, GRIN3A, ADRB3, LEP, NMUR2 518 277 6879 1.869736420…
KEGG_PATHWAY hsa05146:Amoebiasis 20 1.1668611435239207 2.9534070483848267E-4 IL10, SERPINB3, SERPINB4, ITGAM, CXCL8, SERPINB13, CSF2, SERPINB2, PRKCB, COL11A1, ITGB2, PIK3CD, PIK3CG, PIK3R5, IL6, IFNG, IL12B, CTSG, CD14, TLR2 518 106 6879 2.5056458075326 0.06733640052167644 0.001834221219523208 0.0015233362670616475
KEGG_PATHWAY hsa04610:Complement and coagulation cascades 15 0.8751458576429404 5.025591322982493E-4 C1QB, C1QA, CR2, CR1, CFH, C1S, C5AR1, SERPINE1, F13A1, C3, C4A, C7, C3AR1, SERPING1, C1QC 518 69 6879 2.886939734765822 0.11186699603123929 0.0030411270569842773 0.0025256817930886374
KEGG_PATHWAY hsa04670:Leukocyte transendothelial migration 20 1.1668611435239207 8.484846355460546E-4 ITK, ITGAM, VCAM1, NCF1, PRKCB, NCF2, MMP2, ITGB2, CXCR4, PIK3CD, RHOH, ITGAL, PIK3CG, MAPK12, PIK3R5, ICAM1, MAPK11, RASSF5, PLCG2, CLDN18 518 115 6879 2.3095517878126572 0.18153723369262298 0.005006059349721722 0.004157574714175668
KEGG_PATHWAY hsa04668:TNF signaling pathway 19 1.1085180863477246 9.281038300563239E-4 VCAM1, CSF2, CSF1, PIK3CD, PTGS2, SELE, CX3CL1, PIK3CG, MAPK12, PIK3R5, ICAM1, MAPK11, CXCL10, IL6, CCL5, LTA, CCL2, IL18R1, BIRC3 518 107 6879 2.3581171291451666 0.19678608784119478 0.005342256192519328 0.004436789041244865
KEGG_PATHWAY hsa05202:Transcriptional misregulation in cancer 25 1.4585764294049008 0.0014735252633984407 CD86, CSF1R, CD40, CSF2, SPI1, ITGAM, CXCL8, BCL2A1, FLT3, CEBPE, ITGB7, CD14, FCGR1A, PTCRA, NTRK1, NGFR, ZBTB16, PAX5, IGF1, FLI1, ETV7, IL6, NR4A3, MAF, IL2RB 518 167 6879 1.9880123922040092 0.2939070724881765 0.008279808622905524 0.006876451229192723
KEGG_PATHWAY hsa04662:B cell receptor signaling pathway 14 0.8168028004667445 0.0016288454474483569 CR2, CD72, PIK3CD, NFATC1, PIK3CG, PIK3R5, CD79B, CD79A, CD19, BTK, PLCG2, PIK3AP1, FCGR2B, CD22 518 69 6879 2.694477085781434 0.31935944815688844 0.00893970989762354 0.00742450483022972
KEGG_PATHWAY hsa04664:Fc epsilon RI signaling pathway 13 0.7584597432905484 0.004278600061957889 CSF2, FCER1G, PRKCB, IL13, PIK3CD, PIK3CG, MAPK12, PIK3R5, MAPK11, BTK, PLCG2, LCP2, MS4A2 518 68 6879 2.538808766749943 0.6364781789739161 0.02294885487777413 0.019059218457812412
KEGG_PATHWAY hsa04666:Fc gamma R-mediated phagocytosis 14 0.8168028004667445 0.009387092778294701 NCF1, PRKCB, SPHK1, WAS, PIK3CD, PIK3CG, PIK3R5, HCK, FCGR2A, PTPRC, PLCG2, FCGR1A, DOCK2, FCGR2B 518 84 6879 2.2133204633204637 0.8920208681382271 0.04923008657061221 0.040886004101016914
KEGG_PATHWAY hsa04621:NOD-like receptor signaling pathway 10 0.5834305717619603 0.022573789391497207 MAPK11, IL6, PSTPIP1, CXCL8, CCL5, CCL2, NLRP1, MEFV, MAPK12, BIRC3 518 56 6879 2.3714147821290674 0.9954310176087043 0.11581335426942044 0.09618397218985766
KEGG_PATHWAY hsa00770:Pantothenate and CoA biosynthesis 5 0.29171528588098017 0.04143653700846455 VNN1, VNN2, DPYS, DPYD, BCAT1 518 18 6879 3.6888674388674385 0.9999540245903148 0.20806431348931134 0.17279917560976707
KEGG_PATHWAY hsa05205:Proteoglycans in cancer 23 1.3418903150525088 0.044676145363601365 WNT10B, PRKCB, CAV2, WNT7B, MMP2, PIK3CD, FASLG, IGF1, FGF2, ANK1, DCN, PIK3CG, MAPK12, PIK3R5, MAPK11, TIAM1, MRAS, CTSL, PLCG2, IL12B, HCLS1, WNT1, TLR2 518 200 6879 1.5271911196911196 0.9999793201747744 0.2180521481135518 0.18109415690786507
KEGG_PATHWAY hsa05132:Salmonella infection 12 0.7001166861143524 0.04527353922696627 MAPK11, IL6, CXCL8, CSF2, IFNG, CCL3L3, CCL4L2, CCL4, CCL3, WAS, CD14, MAPK12 518 83 6879 1.9199888356514863 0.9999821583741058 0.2180521481135518 0.18109415690786507
KEGG_PATHWAY hsa05134:Legionellosis 9 0.5250875145857643 0.04694571395964007 C3, IL6, CR1, ITGAM, CXCL8, ITGB2, IL12B, CD14, TLR2 518 54 6879 2.2133204633204633 0.9999882032397307 0.22158376988950113 0.18402719872178908
KEGG_PATHWAY hsa04015:Rap1 signaling pathway 23 1.3418903150525088 0.06916876038182564 NGFR, CSF1R, ITGAM, CSF1, PRKCB, ITGB2, FPR1, PIK3CD, IGF1, ITGAL, RASGRP2, FGF2, PIK3CG, MAPK12, PIK3R5, APBB1IP, MAPK11, TIAM1, FGF7, MRAS, CNR1, RASSF5, LCP2 518 210 6879 1.4544677330391615 0.9999999549656136 0.32007504804138925 0.26582503989878087
KEGG_PATHWAY hsa00380:Tryptophan metabolism 7 0.40840140023337224 0.07601707928189072 IL4I1, TDO2, KYNU, CYP1B1, KMO, IDO2, IDO1 518 40 6879 2.3239864864864868 0.9999999921170152 0.34500059058704247 0.2865259142163573
KEGG_PATHWAY hsa04370:VEGF signaling pathway 9 0.5250875145857643 0.08460904911296618 MAPK11, PRKCB, SPHK1, PLCG2, PIK3CD, PTGS2, MAPK12, PIK3CG, PIK3R5 518 61 6879 1.9593328691689347 0.9999999991307171 0.3767497281256607 0.3128938420026674
