# Supplementary material for: High matrix metalloproteinase-2 expression predicts poor prognosis of colon adenocarcinoma and is associated with PD-L1 expression and lymphocyte infiltration
Source: PeerJ. 2025 Jun 30;13:e19550. doi: 10.7717/peerj.19550 (PMC12225630; doi:10.7717/peerj.19550)
Supplement: Supplemental Information 7 [file peerj-13-19550-s007.xlsx]

## Sheet: Sheet 1
gene_name	gene_id	gene_biotype	baseMean	log2FoldChange	lfcSE	stat	pvalue	padj
TSPAN6	ENSG00000000003	protein_coding	5440.7	-0.51089	0.122275	-4.17821	2.93815e-05	0.000101283
TNMD	ENSG00000000005	protein_coding	45.7096	0.192745	0.260263	0.740577	0.45895	0.537784
DPM1	ENSG00000000419	protein_coding	1888.82	-0.541501	0.0892648	-6.06624	1.30941e-09	1.00589e-08
SCYL3	ENSG00000000457	protein_coding	569.778	-0.355291	0.0550033	-6.45944	1.05094e-10	9.77712e-10
C1orf112	ENSG00000000460	protein_coding	405.535	-0.428357	0.0735568	-5.82349	5.7632e-09	3.95345e-08
FGR	ENSG00000000938	protein_coding	316.689	1.93612	0.142842	13.5543	7.47193e-42	1.61789e-39
CFH	ENSG00000000971	protein_coding	930.941	1.36042	0.151804	8.9617	3.19698e-19	1.06882e-17
FUCA2	ENSG00000001036	protein_coding	3214.14	-0.181571	0.0577558	-3.14377	0.00166785	0.00398214
GCLC	ENSG00000001084	protein_coding	1884.15	-0.367328	0.0608475	-6.03687	1.5713e-09	1.1926e-08
NFYA	ENSG00000001167	protein_coding	1281.07	-0.27329	0.0550557	-4.96388	6.9097e-07	3.24591e-06
STPG1	ENSG00000001460	protein_coding	343.12	-0.0683131	0.0667033	-1.02413	0.305772	0.384416
NIPAL3	ENSG00000001461	protein_coding	1477.91	-0.0596071	0.0625653	-0.952719	0.340733	0.42093
LAS1L	ENSG00000001497	protein_coding	2205.3	-0.136381	0.0809105	-1.68558	0.0918775	0.13917
ENPP4	ENSG00000001561	protein_coding	1098.77	-0.585375	0.0892797	-6.55664	5.50344e-11	5.37859e-10
SEMA3F	ENSG00000001617	protein_coding	1588.87	0.332231	0.129674	2.56204	0.0104058	0.0205151
CFTR	ENSG00000001626	protein_coding	6799.96	-0.651699	0.170349	-3.82566	0.00013042	0.000394202
ANKIB1	ENSG00000001629	protein_coding	1942.08	-0.251983	0.0663996	-3.79494	0.000147676	0.00044195
CYP51A1	ENSG00000001630	protein_coding	435.071	-0.000897434	0.115418	-0.00777548	0.993796	0.99513
KRIT1	ENSG00000001631	protein_coding	1152.06	-0.399188	0.0706924	-5.64683	1.63429e-08	1.02548e-07
RAD52	ENSG00000002016	protein_coding	327.45	-0.334226	0.0688273	-4.856	1.1978e-06	5.37834e-06
MYH16	ENSG00000002079	transcribed_unitary_pseudogene	13.9847	-0.282675	0.170102	-1.6618	0.0965536	0.145426
BAD	ENSG00000002330	protein_coding	960.341	0.0456484	0.0889061	0.513445	0.60764	0.676055
LAP3	ENSG00000002549	protein_coding	4153.81	0.695636	0.0786223	8.84781	8.92509e-19	2.84935e-17
CD99	ENSG00000002586	protein_coding	6299.43	0.160426	0.0906776	1.76919	0.0768626	0.119099
HS3ST1	ENSG00000002587	protein_coding	549.636	0.180819	0.113607	1.59162	0.11147	0.164425
AOC1	ENSG00000002726	protein_coding	7486.61	-0.24973	0.147943	-1.68802	0.0914074	0.138533
WNT16	ENSG00000002745	protein_coding	8.62572	1.07557	0.263922	4.07532	4.59521e-05	0.00015271
HECW1	ENSG00000002746	protein_coding	51.3315	1.02881	0.191969	5.35923	8.35794e-08	4.63295e-07
MAD1L1	ENSG00000002822	protein_coding	1032	0.0779339	0.073846	1.05536	0.291262	0.369336
LASP1	ENSG00000002834	protein_coding	13084.2	0.0790163	0.0666249	1.18599	0.235627	0.309377
SNX11	ENSG00000002919	protein_coding	860.148	0.0508742	0.0630579	0.806786	0.41979	0.499801
TMEM176A	ENSG00000002933	protein_coding	7333.05	-0.321142	0.14667	-2.18955	0.0285569	0.050191
M6PR	ENSG00000003056	protein_coding	2812.16	0.155174	0.0553679	2.8026	0.00506918	0.0107791
KLHL13	ENSG00000003096	protein_coding	218.693	-0.0114781	0.238547	-0.048117	0.961623	0.971151
CYP26B1	ENSG00000003137	protein_coding	92.578	1.38712	0.159761	8.68242	3.87435e-18	1.15649e-16
ICA1	ENSG00000003147	protein_coding	2537.39	-0.591622	0.0808301	-7.31933	2.49205e-13	3.67477e-12
DBNDD1	ENSG00000003249	protein_coding	899.962	-0.158726	0.135353	-1.17269	0.240921	0.315121
ALS2	ENSG00000003393	protein_coding	789.321	-0.140868	0.0675231	-2.08621	0.0369593	0.0628419
CASP10	ENSG00000003400	protein_coding	1348.2	0.309957	0.0904606	3.42643	0.00061158	0.00160904
CFLAR	ENSG00000003402	protein_coding	3300.6	0.0702109	0.067056	1.04705	0.295077	0.373178
TFPI	ENSG00000003436	protein_coding	673.17	0.240863	0.146821	1.64053	0.100896	0.151096
NDUFAF7	ENSG00000003509	protein_coding	481.157	-0.3431	0.0517413	-6.63106	3.33278e-11	3.3838e-10
RBM5	ENSG00000003756	protein_coding	2441.75	-0.129168	0.0579957	-2.2272	0.0259342	0.0461083
MTMR7	ENSG00000003987	protein_coding	36.9265	-0.843737	0.147126	-5.73481	9.76228e-09	6.39244e-08
SLC7A2	ENSG00000003989	protein_coding	203.225	0.2801	0.219237	1.27761	0.201387	0.271203
ARF5	ENSG00000004059	protein_coding	5706.21	-0.173726	0.0984068	-1.76538	0.0774993	0.119903
SARM1	ENSG00000004139	protein_coding	277.224	0.164259	0.0843256	1.94791	0.0514258	0.0838274
POLDIP2	ENSG00000004142	protein_coding	5153.9	-0.204244	0.0742296	-2.75151	0.00593207	0.0124187
PLXND1	ENSG00000004399	protein_coding	2854.7	0.963572	0.11455	8.41182	4.03691e-17	1.04654e-15
AK2	ENSG00000004455	protein_coding	4797.77	-0.302153	0.0597474	-5.05716	4.25538e-07	2.081e-06
CD38	ENSG00000004468	protein_coding	231.158	1.25884	0.194295	6.479	9.23322e-11	8.68264e-10
FKBP4	ENSG00000004478	protein_coding	7996.09	-0.184265	0.0769039	-2.39604	0.0165732	0.0310329
KDM1A	ENSG00000004487	protein_coding	4276.4	-0.012857	0.0585414	-0.219622	0.826166	0.864585
RBM6	ENSG00000004534	protein_coding	2306.91	-0.263292	0.0789686	-3.33413	0.000855666	0.00218132
CAMKK1	ENSG00000004660	protein_coding	545.062	-0.0965603	0.0859336	-1.12366	0.261157	0.337166
RECQL	ENSG00000004700	protein_coding	706.767	0.222207	0.0939616	2.36487	0.0180366	0.0334598
VPS50	ENSG00000004766	protein_coding	925.818	-0.343673	0.0725589	-4.73647	2.17474e-06	9.31266e-06
HSPB6	ENSG00000004776	protein_coding	295.063	1.83688	0.232174	7.91167	2.53965e-15	5.13212e-14
ARHGAP33	ENSG00000004777	protein_coding	321.169	-0.0452778	0.118903	-0.380796	0.703355	0.760467
NDUFAB1	ENSG00000004779	protein_coding	2625.07	-0.334133	0.0822622	-4.0618	4.86957e-05	0.000160958
PDK4	ENSG00000004799	protein_coding	703.919	0.0849864	0.164767	0.515799	0.605995	0.674529
SLC22A16	ENSG00000004809	protein_coding	3.69148	1.11304	0.235663	4.72302	2.32372e-06	9.89488e-06
ZMYND10	ENSG00000004838	protein_coding	27.5581	0.877897	0.176177	4.98305	6.25901e-07	2.96625e-06
ABCB5	ENSG00000004846	protein_coding	6.51618	0.937908	0.357155	2.62605	0.00863816	0.0173619
ARX	ENSG00000004848	protein_coding	26.9268	-0.407407	0.347678	-1.17179	0.24128	0.315482
SLC25A13	ENSG00000004864	protein_coding	1539.28	-0.337611	0.0695739	-4.85255	1.21885e-06	5.46871e-06
ST7	ENSG00000004866	protein_coding	1020.98	-0.0885413	0.0584455	-1.51494	0.129788	0.187255
CDC27	ENSG00000004897	protein_coding	1995.58	-0.252662	0.0787837	-3.20703	0.00134112	0.00327101
SLC4A1	ENSG00000004939	protein_coding	2.44199	0.205536	0.327064	0.628427	0.529724	0.605022
CALCR	ENSG00000004948	protein_coding	6.43147	-0.657723	0.258527	-2.54411	0.0109555	0.0214843
HCCS	ENSG00000004961	protein_coding	1353.79	-0.194255	0.0677851	-2.86574	0.00416032	0.00903262
DVL2	ENSG00000004975	protein_coding	1098.81	0.275473	0.0694103	3.96876	7.22471e-05	0.000230615
PRSS22	ENSG00000005001	protein_coding	915.912	-0.341114	0.150032	-2.2736	0.0229899	0.0414895
UPF1	ENSG00000005007	protein_coding	5626.55	0.0996876	0.0586913	1.69851	0.089412	0.135881
SKAP2	ENSG00000005020	protein_coding	1705.67	-0.146524	0.0992731	-1.47597	0.139953	0.199483
SLC25A5	ENSG00000005022	protein_coding	25600.1	-0.144919	0.104973	-1.38053	0.167423	0.231983
MCUB	ENSG00000005059	protein_coding	595.434	0.459176	0.114764	4.00104	6.30641e-05	0.000204022
HOXA11	ENSG00000005073	protein_coding	536.904	-0.188419	0.118295	-1.5928	0.111206	0.164111
POLR2J	ENSG00000005075	protein_coding	1471.95	-0.37259	0.0945741	-3.93967	8.1595e-05	0.000257503
DHX33	ENSG00000005100	protein_coding	1120.83	-0.0473997	0.0614372	-0.771515	0.440402	0.52006
MEOX1	ENSG00000005102	protein_coding	70.4794	2.03248	0.152885	13.2942	2.50112e-40	4.86147e-38
THSD7A	ENSG00000005108	protein_coding	88.0091	0.755225	0.195718	3.85874	0.000113972	0.000348776
LIG3	ENSG00000005156	protein_coding	1317.49	-0.219609	0.0608709	-3.60779	0.000308821	0.000864641
RPAP3	ENSG00000005175	protein_coding	1095.02	-0.336044	0.0672674	-4.99565	5.86391e-07	2.7939e-06
ACSM3	ENSG00000005187	protein_coding	653.976	-0.467913	0.156729	-2.98549	0.00283121	0.00640667
REXO5	ENSG00000005189	protein_coding	218.335	-0.325792	0.083285	-3.91177	9.16219e-05	0.000286143
CIAPIN1	ENSG00000005194	protein_coding	2158.73	-0.155119	0.0621023	-2.4978	0.0124967	0.0241095
SPPL2B	ENSG00000005206	protein_coding	2665.38	-0.0533374	0.104636	-0.509744	0.610231	0.678377
FAM214B	ENSG00000005238	protein_coding	803.682	0.242331	0.102369	2.36723	0.0179217	0.0332703
COPZ2	ENSG00000005243	protein_coding	201.864	1.1506	0.133215	8.63717	5.76225e-18	1.66993e-16
PRKAR2B	ENSG00000005249	protein_coding	279.939	1.20407	0.174275	6.90901	4.88052e-12	5.75337e-11
MSL3	ENSG00000005302	protein_coding	1093.36	-0.0614114	0.054235	-1.13232	0.257499	0.333214
CREBBP	ENSG00000005339	protein_coding	3410.87	0.310831	0.0638746	4.86627	1.13726e-06	5.12853e-06
TSPOAP1	ENSG00000005379	protein_coding	608.881	0.544476	0.194126	2.80475	0.00503551	0.0107167
MPO	ENSG00000005381	protein_coding	13.0702	0.249135	0.193233	1.2893	0.197294	0.266472
PON1	ENSG00000005421	protein_coding	9.32127	-0.579552	0.314416	-1.84327	0.0652901	0.103304
GCFC2	ENSG00000005436	protein_coding	618.442	-0.580615	0.0805498	-7.20814	5.67196e-13	7.86434e-12
WDR54	ENSG00000005448	protein_coding	422.861	0.464353	0.107672	4.31266	1.613e-05	5.85385e-05
CROT	ENSG00000005469	protein_coding	481.931	-0.260894	0.0962603	-2.7103	0.00672219	0.0138836
ABCB4	ENSG00000005471	protein_coding	54.9357	0.0292602	0.153442	0.190692	0.848767	0.883304
KMT2E	ENSG00000005483	protein_coding	3056.82	-0.0708294	0.0832694	-0.850606	0.394988	0.475378
RHBDD2	ENSG00000005486	protein_coding	3014.77	0.0565806	0.101435	0.557803	0.576979	0.648407
SOX8	ENSG00000005513	protein_coding	142.544	0.41037	0.276619	1.48352	0.137936	0.197086
IBTK	ENSG00000005700	protein_coding	2549.57	-0.443716	0.0844037	-5.25707	1.46371e-07	7.78125e-07
ZNF195	ENSG00000005801	protein_coding	1056.45	-0.621225	0.0726436	-8.55168	1.21306e-17	3.37001e-16
MYCBP2	ENSG00000005810	protein_coding	2421.02	-0.173766	0.113793	-1.52704	0.126751	0.183456
FBXL3	ENSG00000005812	protein_coding	1769.02	-0.376925	0.0834954	-4.51432	6.35199e-06	2.49272e-05
ITGAL	ENSG00000005844	protein_coding	548.341	2.40463	0.125133	19.2167	2.6855e-82	9.35227e-79
PDK2	ENSG00000005882	protein_coding	982.719	0.0976955	0.101558	0.961965	0.336067	0.415953
ITGA3	ENSG00000005884	protein_coding	5174.92	0.1927	0.113828	1.69291	0.0904734	0.137302
ZFX	ENSG00000005889	protein_coding	1082.17	-0.374354	0.0946343	-3.95579	7.62813e-05	0.000242326
LAMP2	ENSG00000005893	protein_coding	5606.53	-0.209433	0.0750778	-2.78955	0.0052781	0.0111886
ITGA2B	ENSG00000005961	protein_coding	13.8238	0.859782	0.163138	5.27028	1.36213e-07	7.28388e-07
ASB4	ENSG00000005981	protein_coding	25.1341	-1.30237	0.291314	-4.47067	7.79754e-06	3.00193e-05
GDE1	ENSG00000006007	protein_coding	3690.7	-0.00668601	0.0558861	-0.119636	0.904771	0.927089
REX1BD	ENSG00000006015	protein_coding	1465.35	-0.032112	0.129461	-0.248043	0.804101	0.846155
CRLF1	ENSG00000006016	protein_coding	54.8811	0.682027	0.126746	5.38107	7.40459e-08	4.14685e-07
OSBPL7	ENSG00000006025	protein_coding	1103.63	-0.0835039	0.116665	-0.715761	0.474139	0.552252
TMEM98	ENSG00000006042	protein_coding	2842.93	-0.125817	0.0995741	-1.26355	0.20639	0.276958
YBX2	ENSG00000006047	protein_coding	671.428	-0.188728	0.131006	-1.44061	0.149696	0.21108
KRT33A	ENSG00000006059	protein_coding	0.184157	0.155719	1.25015	0.124561	0.900871
MAP3K14	ENSG00000006062	protein_coding	649.079	0.475023	0.0759775	6.25215	4.04838e-10	3.41092e-09
ABCC8	ENSG00000006071	protein_coding	10.2772	0.119883	0.228894	0.523748	0.600454	0.669324
CACNG3	ENSG00000006116	protein_coding	0.230936	0.43982	0.610078	0.720923	0.470957	0.549082
TMEM132A	ENSG00000006118	protein_coding	1583.71	0.792831	0.11962	6.62789	3.40514e-11	3.45222e-10
AP2B1	ENSG00000006125	protein_coding	10915.6	-0.00217717	0.0630465	-0.0345327	0.972452	0.979319
TAC1	ENSG00000006128	protein_coding	75.425	-0.0714479	0.313764	-0.227712	0.81987	0.859331
ZNF263	ENSG00000006194	protein_coding	1279.31	-0.17097	0.0475838	-3.59302	0.000326871	0.000910238
CX3CL1	ENSG00000006210	protein_coding	1070.96	1.37795	0.151455	9.09804	9.19742e-20	3.26005e-18
SPATA20	ENSG00000006282	protein_coding	2152.46	0.155131	0.106004	1.46344	0.143346	0.203493
CACNA1G	ENSG00000006283	protein_coding	8.29322	0.839673	0.193836	4.33188	1.47842e-05	5.40677e-05
TNFRSF12A	ENSG00000006327	protein_coding	2166.23	0.0154369	0.109061	0.141544	0.887441	0.913812
DLX6	ENSG00000006377	protein_coding	31.5431	-1.05452	0.342522	-3.07868	0.00207921	0.00485881
MAP3K9	ENSG00000006432	protein_coding	532.785	-0.0307094	0.0857464	-0.358142	0.720237	0.775041
RALA	ENSG00000006451	protein_coding	3439.24	-0.237471	0.0548178	-4.33201	1.47757e-05	5.40413e-05
BAIAP2L1	ENSG00000006453	protein_coding	4207.45	-0.201883	0.0828284	-2.43736	0.0147948	0.028032
KDM7A	ENSG00000006459	protein_coding	2645.55	-0.660132	0.0932062	-7.08249	1.41587e-12	1.83698e-11
ETV1	ENSG00000006468	protein_coding	324.641	0.335053	0.151462	2.21213	0.026958	0.0476695
AGK	ENSG00000006530	protein_coding	1119.19	-0.513549	0.063281	-8.11538	4.84286e-16	1.0916e-14
ALDH3B1	ENSG00000006534	protein_coding	1405.36	-0.0642474	0.12374	-0.519213	0.603612	0.672271
TTC22	ENSG00000006555	protein_coding	1048.51	0.00705362	0.0992466	0.0710717	0.943341	0.957221
PHTF2	ENSG00000006576	protein_coding	708.127	0.0274351	0.0883448	0.310545	0.756146	0.806229
CCL26	ENSG00000006606	protein_coding	32.4207	-0.260081	0.207076	-1.25597	0.209128	0.280057
FARP2	ENSG00000006607	protein_coding	2503.34	-0.208465	0.0580719	-3.58977	0.000330964	0.000920532
USH1C	ENSG00000006611	protein_coding	5408.33	-0.380338	0.0981396	-3.87548	0.000106415	0.000328004
GGCT	ENSG00000006625	protein_coding	2160.76	-0.608095	0.0807408	-7.53144	5.01828e-14	8.28254e-13
DBF4	ENSG00000006634	protein_coding	847.91	-0.470074	0.0833331	-5.64091	1.69155e-08	1.05855e-07
TBXA2R	ENSG00000006638	protein_coding	64.1211	0.986303	0.110437	8.93089	4.22613e-19	1.39613e-17
IFRD1	ENSG00000006652	protein_coding	1712.93	-0.557373	0.0846113	-6.58746	4.47426e-11	4.43732e-10
LGALS14	ENSG00000006659	protein_coding	1.13721	-0.408612	0.475081	-0.86009	0.389739	0.470334
COX10	ENSG00000006695	protein_coding	782.514	0.0536145	0.0612074	0.875948	0.381058	0.461872
GTF2IRD1	ENSG00000006704	protein_coding	2661.8	-0.330613	0.0872564	-3.78898	0.000151267	0.000451565
PAF1	ENSG00000006712	protein_coding	1898.54	0.216738	0.0775818	2.79368	0.00521125	0.0110603
VPS41	ENSG00000006715	protein_coding	2035.23	-0.210169	0.0607193	-3.46132	0.000537535	0.00143254
ARHGAP44	ENSG00000006740	protein_coding	590.541	0.245915	0.14114	1.74234	0.0814485	0.125188
ELAC2	ENSG00000006744	protein_coding	2701.65	0.175782	0.0700905	2.50793	0.0121442	0.0235173
SCIN	ENSG00000006747	protein_coding	555.783	-0.281102	0.184298	-1.52526	0.127195	0.184022
ARSD	ENSG00000006756	protein_coding	3522.62	-0.391659	0.107981	-3.6271	0.000286621	0.000807408
PNPLA4	ENSG00000006757	protein_coding	853.327	-0.426483	0.117032	-3.64415	0.000268274	0.000760749
MYH13	ENSG00000006788	protein_coding	4.52357	0.162079	0.257196	0.630177	0.528579	0.604045
ADIPOR2	ENSG00000006831	protein_coding	3931.12	-0.176126	0.0508646	-3.46264	0.000534896	0.00142605
CDKL3	ENSG00000006837	protein_coding	19.517	-0.690492	0.0978616	-7.0558	1.7161e-12	2.19651e-11
UPP2	ENSG00000007001	protein_coding	2.88534	-0.952746	0.256924	-3.70828	0.00020867	0.000606467
PRSS21	ENSG00000007038	protein_coding	83.0951	2.30986	0.341546	6.76296	1.35205e-11	1.47371e-10
MARK4	ENSG00000007047	protein_coding	846.716	0.291626	0.0739234	3.94497	7.9809e-05	0.0002524
PROM1	ENSG00000007062	protein_coding	3628.53	-0.243392	0.200869	-1.2117	0.225629	0.298728
CCDC124	ENSG00000007080	protein_coding	2221.29	0.129834	0.10686	1.21499	0.224369	0.297256
CEACAM21	ENSG00000007129	protein_coding	40.8405	1.17042	0.134805	8.68228	3.87907e-18	1.15707e-16
PAFAH1B1	ENSG00000007168	protein_coding	3540.69	0.093681	0.0586955	1.59605	0.110478	0.163198
NOS2	ENSG00000007171	protein_coding	2265.33	1.00388	0.232423	4.31922	1.56585e-05	5.69858e-05
DNAH9	ENSG00000007174	protein_coding	16.9662	0.385803	0.207683	1.85765	0.0632186	0.100434
KIAA0100	ENSG00000007202	protein_coding	5974.03	-0.00514072	0.0601614	-0.0854488	0.931905	0.948427
SLC13A2	ENSG00000007216	protein_coding	265.863	0.0486377	0.298811	0.162771	0.870699	0.900656
GAS7	ENSG00000007237	protein_coding	708.446	1.76815	0.124927	14.1535	1.77659e-45	4.82101e-43
TRAPPC6A	ENSG00000007255	protein_coding	1083.33	-0.43416	0.122146	-3.55443	0.000378803	0.00104043
MATK	ENSG00000007264	protein_coding	102.798	1.56861	0.172745	9.08048	1.08099e-19	3.79298e-18
CEACAM7	ENSG00000007306	protein_coding	5300.14	0.326566	0.272068	1.20031	0.230019	0.303464
CD79B	ENSG00000007312	protein_coding	119.125	2.30486	0.153044	15.0601	2.96252e-51	1.22578e-48
SCN4A	ENSG00000007314	protein_coding	8.71049	0.45348	0.220236	2.05906	0.039488	0.0666157
ST7L	ENSG00000007341	protein_coding	346.105	-0.446408	0.0654079	-6.82498	8.79368e-12	9.90266e-11
TKTL1	ENSG00000007350	protein_coding	9.43522	1.05741	0.350259	3.01894	0.00253661	0.00580881
PAX6	ENSG00000007372	protein_coding	104.191	-0.324381	0.128587	-2.52265	0.0116474	0.0226625
RPUSD1	ENSG00000007376	protein_coding	1568.77	0.0578439	0.11264	0.513529	0.607581	0.676007
RHBDF1	ENSG00000007384	protein_coding	1782.29	0.0902816	0.104195	0.86647	0.386233	0.466898
LUC7L	ENSG00000007392	protein_coding	1295.06	-0.278344	0.0743531	-3.74354	0.000181442	0.000533602
CACNA2D2	ENSG00000007402	protein_coding	240.799	-0.0586353	0.216839	-0.270409	0.786846	0.83162
BAIAP3	ENSG00000007516	protein_coding	238.557	0.0542251	0.179322	0.302389	0.762355	0.811153
TSR3	ENSG00000007520	protein_coding	1525.45	0.0488634	0.089396	0.546595	0.584657	0.655229
PIGQ	ENSG00000007541	protein_coding	1649.73	0.17637	0.103516	1.70379	0.0884202	0.134533
CRAMP1	ENSG00000007545	protein_coding	631.46	-0.0175338	0.0563531	-0.311141	0.755693	0.805868
TEAD3	ENSG00000007866	protein_coding	1564.65	0.188009	0.0657996	2.8573	0.00427268	0.00924534
SELE	ENSG00000007908	protein_coding	183.894	1.51097	0.205221	7.36265	1.80295e-13	2.73287e-12
DNAJC11	ENSG00000007923	protein_coding	1461.44	0.0661805	0.0620227	1.06704	0.285955	0.363721
FMO3	ENSG00000007933	protein_coding	41.8662	0.971757	0.147658	6.58115	4.66823e-11	4.62178e-10
MYLIP	ENSG00000007944	protein_coding	1110.27	-0.031699	0.0672299	-0.471502	0.637283	0.702449
NOX1	ENSG00000007952	protein_coding	6113.28	-0.398705	0.183897	-2.16809	0.0301521	0.0525965
E2F2	ENSG00000007968	protein_coding	549.781	0.139409	0.0953091	1.46271	0.143548	0.203731
PSMB1	ENSG00000008018	protein_coding	6773.14	-0.30106	0.0754848	-3.98836	6.65326e-05	0.000214091
SYN1	ENSG00000008056	protein_coding	79.0525	0.310115	0.177438	1.74774	0.0805098	0.123873
JARID2	ENSG00000008083	protein_coding	948.117	0.0190877	0.0713227	0.267624	0.788989	0.833524
CDKL5	ENSG00000008086	protein_coding	359.053	-0.193417	0.135757	-1.42474	0.154234	0.216362
CAMK1G	ENSG00000008118	protein_coding	14.6525	1.29027	0.153827	8.3878	4.95311e-17	1.26677e-15
CDK11A	ENSG00000008128	protein_coding	304.283	-0.052777	0.102316	-0.515825	0.605977	0.674529
NADK	ENSG00000008130	protein_coding	2811.6	0.128746	0.0659726	1.95151	0.0509969	0.0832484
TFAP2B	ENSG00000008196	protein_coding	0.59744	-0.728884	0.553981	-1.31572	0.188268	0.256052
TFAP2D	ENSG00000008197	protein_coding	0.138694	-0.390213	2.05684	-0.189715	0.849532
DLEC1	ENSG00000008226	protein_coding	49.586	-0.362534	0.168226	-2.15504	0.0311587	0.05414
CYTH3	ENSG00000008256	protein_coding	987.126	0.44613	0.0784554	5.68642	1.29731e-08	8.31001e-08
ADAM22	ENSG00000008277	protein_coding	240.865	0.0942759	0.147542	0.638974	0.52284	0.59864
SYPL1	ENSG00000008282	protein_coding	5626.33	-0.328903	0.0653413	-5.03362	4.81306e-07	2.3296e-06
CYB561	ENSG00000008283	protein_coding	3899.73	-0.0589054	0.0776499	-0.758603	0.44809	0.527588
SPAG9	ENSG00000008294	protein_coding	2846.81	-0.226282	0.0819277	-2.76197	0.00574546	0.0120782
CELSR3	ENSG00000008300	protein_coding	883.785	-0.137966	0.135187	-1.02056	0.307462	0.386176
AASS	ENSG00000008311	protein_coding	128.423	-0.131778	0.162098	-0.812952	0.416245	0.49626
PLEKHG6	ENSG00000008323	protein_coding	2039.53	-0.346229	0.107299	-3.22677	0.00125197	0.00307565
SS18L2	ENSG00000008324	protein_coding	583.936	-0.50448	0.0621943	-8.11135	5.00598e-16	1.12473e-14
MPND	ENSG00000008382	protein_coding	884.917	-0.00728333	0.094293	-0.0772415	0.938431	0.953513
MGST1	ENSG00000008394	protein_coding	3989.28	-0.260626	0.117375	-2.22046	0.0263873	0.046795
CRY1	ENSG00000008405	protein_coding	757.715	0.0406711	0.0640832	0.634661	0.52565	0.601384
PGLYRP1	ENSG00000008438	protein_coding	5.46156	0.0952	0.218296	0.436104	0.662761	0.724706
NFIX	ENSG00000008441	protein_coding	3652.34	0.241235	0.0803162	3.00357	0.00266834	0.00607949
ST3GAL1	ENSG00000008513	protein_coding	1137.7	0.638858	0.157611	4.05338	5.04826e-05	0.00016643
MMP25	ENSG00000008516	protein_coding	144.242	1.97469	0.137503	14.3611	9.08011e-47	2.8108e-44
IL32	ENSG00000008517	protein_coding	6205.82	0.702652	0.115152	6.10193	1.04794e-09	8.17957e-09
PKD1	ENSG00000008710	protein_coding	2157.81	0.424855	0.096573	4.39931	1.08593e-05	4.06674e-05
MAPK8IP2	ENSG00000008735	protein_coding	187.256	1.45995	0.215238	6.78296	1.17739e-11	1.2972e-10
MED24	ENSG00000008838	protein_coding	4099.81	-0.272749	0.10483	-2.60184	0.0092726	0.0184967
RHOBTB2	ENSG00000008853	protein_coding	577.045	0.266209	0.0999566	2.66324	0.00773915	0.0157565
HEATR5B	ENSG00000008869	protein_coding	1104.15	-0.166741	0.0661724	-2.51979	0.0117424	0.0228282
SEC62	ENSG00000008952	protein_coding	3711.42	-0.223728	0.0615697	-3.63373	0.000279351	0.000789109
RPS20	ENSG00000008988	protein_coding	28511.4	-0.480316	0.0856984	-5.60473	2.08579e-08	1.28278e-07
CSDE1	ENSG00000009307	protein_coding	15974.6	-0.170387	0.0495924	-3.43574	0.000590941	0.00155974
UBE3C	ENSG00000009335	protein_coding	4364.64	-0.204905	0.0468346	-4.37507	1.21391e-05	4.50809e-05
REV3L	ENSG00000009413	protein_coding	809.708	-0.433036	0.122565	-3.53312	0.000410689	0.00112094
TENM1	ENSG00000009694	protein_coding	13.4162	-0.450482	0.263682	-1.70843	0.0875564	0.133355
PAX7	ENSG00000009709	protein_coding	5.22062	1.00801	0.586379	1.71904	0.0856072	0.130736
MASP2	ENSG00000009724	protein_coding	34.308	-0.501972	0.144809	-3.46645	0.000527387	0.0014089
IYD	ENSG00000009765	protein_coding	1382.4	-0.783266	0.143276	-5.46682	4.58192e-08	2.65537e-07
FAM76A	ENSG00000009780	protein_coding	416.486	-0.283121	0.0619434	-4.57065	4.8622e-06	1.94721e-05
TRAF3IP3	ENSG00000009790	protein_coding	166.973	1.62341	0.146619	11.0723	1.70907e-28	1.33002e-26
POMT2	ENSG00000009830	protein_coding	614.292	0.182009	0.0647653	2.81028	0.00494978	0.0105472
VTA1	ENSG00000009844	protein_coding	1879.71	-0.244415	0.0523527	-4.66863	3.03221e-06	1.26513e-05
MLXIPL	ENSG00000009950	protein_coding	1519.73	-0.315872	0.158367	-1.99456	0.0460914	0.0762172
BAZ1B	ENSG00000009954	protein_coding	4245.25	-0.0606413	0.0539751	-1.12351	0.261223	0.337241
RANBP9	ENSG00000010017	protein_coding	1565.72	-0.121317	0.0483281	-2.51028	0.0120634	0.0233805
ETV7	ENSG00000010030	protein_coding	559.607	0.934262	0.13281	7.03458	1.99865e-12	2.53102e-11
SPRTN	ENSG00000010072	protein_coding	419.296	-0.253424	0.0573161	-4.42152	9.80102e-06	3.70263e-05
EEF1AKNMT	ENSG00000010165	protein_coding	1903.15	-0.030643	0.0651274	-0.470508	0.637992	0.703104
DYRK4	ENSG00000010219	protein_coding	684.952	-0.319389	0.0950671	-3.35961	0.00078052	0.00200837
ZNF207	ENSG00000010244	protein_coding	6176.19	-0.266874	0.0568867	-4.69133	2.71433e-06	1.14312e-05
UQCRC1	ENSG00000010256	protein_coding	12274.3	-0.0398094	0.115319	-0.345213	0.729934	0.78372
STARD3NL	ENSG00000010270	protein_coding	1237.28	-0.357882	0.073959	-4.83892	1.30546e-06	5.82732e-06
CD9	ENSG00000010278	protein_coding	18944.2	-0.206056	0.0816597	-2.52335	0.0116241	0.0226267
HHATL	ENSG00000010282	protein_coding	0.793751	0.645488	0.365505	1.76602	0.0773931	0.119778
NCAPD2	ENSG00000010292	protein_coding	4666.1	0.0247767	0.0657751	0.376688	0.706405	0.763179
IFFO1	ENSG00000010295	protein_coding	258.295	1.55625	0.0902787	17.2383	1.37082e-66	1.90955e-63
GIPR	ENSG00000010310	protein_coding	91.4728	0.385722	0.175229	2.20124	0.0277192	0.0488543
PHF7	ENSG00000010318	protein_coding	146.806	-0.0857973	0.0834024	-1.02872	0.303613	0.382284
SEMA3G	ENSG00000010319	protein_coding	220.844	1.62936	0.14433	11.2891	1.48571e-29	1.2543e-27
NISCH	ENSG00000010322	protein_coding	2378.36	0.321238	0.0694139	4.62786	3.6946e-06	1.51326e-05
STAB1	ENSG00000010327	protein_coding	1791.62	1.58653	0.127936	12.401	2.58124e-35	3.23934e-33
FUZ	ENSG00000010361	protein_coding	233.612	-0.159466	0.152267	-1.04728	0.29497	0.373121
SLC6A13	ENSG00000010379	protein_coding	2.91795	0.144555	0.268867	0.537644	0.590823	0.660562
IDS	ENSG00000010404	protein_coding	2277.47	0.291764	0.0923496	3.15934	0.00158128	0.00379627
PRSS3	ENSG00000010438	protein_coding	3896.39	-0.137933	0.135659	-1.01677	0.309264	0.388089
ZNF200	ENSG00000010539	protein_coding	479.864	-0.239126	0.0580535	-4.11906	3.80416e-05	0.000128393
CD4	ENSG00000010610	protein_coding	1382.12	2.14576	0.110583	19.404	7.13877e-84	2.98329e-80
LRRC23	ENSG00000010626	protein_coding	204.839	-0.312702	0.0782919	-3.99405	6.49554e-05	0.000209564
BTK	ENSG00000010671	protein_coding	160.604	1.61866	0.147148	11.0002	3.81109e-28	2.84911e-26
HFE	ENSG00000010704	protein_coding	457.189	-0.0584449	0.0783537	-0.745911	0.455721	0.534699
SCMH1	ENSG00000010803	protein_coding	1350.85	-0.135976	0.0574347	-2.3675	0.0179089	0.033257
FYN	ENSG00000010810	protein_coding	924.672	0.643862	0.124817	5.15846	2.48987e-07	1.26908e-06
HIVEP2	ENSG00000010818	protein_coding	990.893	0.32346	0.0905878	3.57068	0.000356055	0.000982861
FMO1	ENSG00000010932	protein_coding	37.8432	0.876056	0.18719	4.68003	2.86838e-06	1.20281e-05
ELOA	ENSG00000011007	protein_coding	1550.26	-0.0427704	0.0503721	-0.84909	0.395831	0.476173
LYPLA2	ENSG00000011009	protein_coding	3091.82	-0.0674727	0.0841093	-0.802203	0.422436	0.502465
CLCN6	ENSG00000011021	protein_coding	481.543	0.298818	0.0676804	4.41514	1.00947e-05	3.80463e-05
MRC2	ENSG00000011028	protein_coding	2277.9	1.6905	0.138232	12.2295	2.16372e-34	2.52575e-32
NME1-NME2	ENSG00000011052	protein_coding	38.1849	-0.349205	0.141247	-2.47231	0.0134245	0.0256943
SLC6A7	ENSG00000011083	protein_coding	120.591	-0.075667	0.174706	-0.433111	0.664934	0.72665
TSPAN9	ENSG00000011105	protein_coding	1161.2	0.635123	0.08964	7.08526	1.38782e-12	1.80339e-11
BTBD7	ENSG00000011114	protein_coding	1264.34	-0.0599866	0.0696893	-0.860771	0.389364	0.470003
APBA3	ENSG00000011132	protein_coding	647.921	0.232282	0.0910611	2.55084	0.0107465	0.0211111
MKS1	ENSG00000011143	protein_coding	551.743	-0.131334	0.0590532	-2.22399	0.026149	0.046418
ABHD5	ENSG00000011198	protein_coding	454.128	-0.0857323	0.0672949	-1.27398	0.202671	0.272651
ANOS1	ENSG00000011201	protein_coding	367.469	0.647924	0.191039	3.39158	0.000694917	0.00180657
AKAP8L	ENSG00000011243	protein_coding	1208.02	-0.0408299	0.0600593	-0.679827	0.496614	0.573682
MBTD1	ENSG00000011258	protein_coding	912.287	-0.528019	0.0959715	-5.50184	3.75856e-08	2.2135e-07
UTP18	ENSG00000011260	protein_coding	1667.14	-0.29396	0.0656758	-4.47593	7.60787e-06	2.93702e-05
RNF216	ENSG00000011275	protein_coding	1985.38	0.0625335	0.0547718	1.14171	0.253575	0.328869
TTC19	ENSG00000011295	protein_coding	2034.48	-0.214827	0.0733213	-2.92994	0.00339027	0.00752614
PTBP1	ENSG00000011304	protein_coding	13670.8	0.053822	0.0554326	0.970945	0.331576	0.411198
DPF1	ENSG00000011332	protein_coding	26.0449	0.922914	0.155249	5.94472	2.76929e-09	2.00953e-08
SYT7	ENSG00000011347	protein_coding	2526.01	-0.629058	0.151076	-4.16385	3.12931e-05	0.000107263
LARS2	ENSG00000011376	protein_coding	1670.11	0.0255926	0.0708647	0.361148	0.717989	0.77315
PIK3C2A	ENSG00000011405	protein_coding	2055.8	-0.502277	0.0986784	-5.09004	3.57992e-07	1.77299e-06
PLAUR	ENSG00000011422	protein_coding	2878.88	0.678049	0.117074	5.79165	6.96981e-09	4.69258e-08
ANLN	ENSG00000011426	protein_coding	2211.55	-0.416516	0.0892026	-4.66933	3.02185e-06	1.26119e-05
WIZ	ENSG00000011451	protein_coding	2027.25	0.282006	0.0708654	3.97947	6.90701e-05	0.000221489
RABGAP1	ENSG00000011454	protein_coding	1997.44	-0.126236	0.0640406	-1.97119	0.0487019	0.0799801
DCN	ENSG00000011465	protein_coding	6972.31	1.56901	0.162053	9.68206	3.59409e-22	1.60983e-20
QPCTL	ENSG00000011478	protein_coding	645.134	-0.170326	0.0867913	-1.96248	0.0497064	0.0814057
PPP5C	ENSG00000011485	protein_coding	2628.53	-0.0185747	0.0645986	-0.287541	0.773698	0.820444
CEP68	ENSG00000011523	protein_coding	1021	-0.187035	0.0759252	-2.46342	0.013762	0.0262765
MAP4K3	ENSG00000011566	protein_coding	1324.52	-0.425229	0.0786627	-5.40573	6.45457e-08	3.65695e-07
ZBTB32	ENSG00000011590	protein_coding	25.9973	1.24202	0.144613	8.58853	8.80882e-18	2.49235e-16
TYROBP	ENSG00000011600	protein_coding	1146.61	2.06752	0.134816	15.3359	4.40285e-53	2.09085e-50
TMEM159	ENSG00000011638	protein_coding	1325	-0.215661	0.078052	-2.76305	0.00572648	0.0120416
GABRA3	ENSG00000011677	protein_coding	28.0326	0.443172	0.426448	1.03922	0.298703	0.376999
BRCA1	ENSG00000012048	protein_coding	1060.69	-0.377609	0.0814726	-4.6348	3.57278e-06	1.46926e-05
ERCC1	ENSG00000012061	protein_coding	1394.65	-0.133029	0.0719889	-1.84791	0.0646148	0.102348
CD22	ENSG00000012124	protein_coding	127.901	2.42408	0.205372	11.8034	3.7492e-32	3.76633e-30
SEMA3B	ENSG00000012171	protein_coding	1789.15	0.00454125	0.154829	0.0293308	0.976601	0.982242
MBTPS2	ENSG00000012174	protein_coding	951.353	-0.295932	0.0813422	-3.63811	0.000274651	0.000777357
PRICKLE3	ENSG00000012211	protein_coding	587.467	0.19663	0.0883356	2.22594	0.0260182	0.0462288
LTF	ENSG00000012223	protein_coding	205.57	1.16717	0.202198	5.77239	7.81542e-09	5.22654e-08
EXTL3	ENSG00000012232	protein_coding	1542.48	0.151382	0.0844545	1.79247	0.0730577	0.113862
NR1H4	ENSG00000012504	protein_coding	43.6215	0.0701589	0.300194	0.233712	0.815209	0.85541
ELOVL5	ENSG00000012660	protein_coding	2287.54	0.158726	0.118135	1.3436	0.179078	0.245502
ALOX5	ENSG00000012779	protein_coding	985.997	0.56623	0.171713	3.29754	0.000975371	0.00245502
KDM5D	ENSG00000012817	protein_coding	579.276	-0.165612	0.406685	-0.407225	0.683843	0.743419
CALCOCO1	ENSG00000012822	protein_coding	2114.67	0.182917	0.0750128	2.43848	0.0147492	0.0279571
UBR7	ENSG00000012963	protein_coding	1280.91	0.0407034	0.0514908	0.790498	0.429237	0.509134
MAP4K5	ENSG00000012983	protein_coding	1262.14	-0.114644	0.0851544	-1.34631	0.178203	0.244447
EHD3	ENSG00000013016	protein_coding	264.563	1.26345	0.114044	11.0786	1.59301e-28	1.24581e-26
PSMC4	ENSG00000013275	protein_coding	3611.47	0.0836933	0.0748337	1.11839	0.263401	0.339539
MAN2B2	ENSG00000013288	protein_coding	2171.02	0.298347	0.0711878	4.19099	2.77742e-05	9.62186e-05
SLC7A14	ENSG00000013293	protein_coding	4.913	0.775471	0.342078	2.26694	0.0233937	0.0421208
CLDN11	ENSG00000013297	protein_coding	56.7254	1.23847	0.186735	6.63225	3.30601e-11	3.35825e-10
SLC25A39	ENSG00000013306	protein_coding	8930.59	-0.151341	0.100399	-1.5074	0.131707	0.1895
MVP	ENSG00000013364	protein_coding	14408.6	0.123464	0.0916067	1.34777	0.177734	0.2439
NUB1	ENSG00000013374	protein_coding	3164.29	0.227894	0.0560475	4.06609	4.78077e-05	0.000158411
PGM3	ENSG00000013375	protein_coding	1734	-0.360577	0.0721911	-4.99476	5.89079e-07	2.80575e-06
RWDD2A	ENSG00000013392	protein_coding	285.66	-0.150446	0.072655	-2.07069	0.0383877	0.0649903
CLK1	ENSG00000013441	protein_coding	1839.06	-0.40101	0.0756769	-5.29898	1.16454e-07	6.31841e-07
POLR3B	ENSG00000013503	protein_coding	537.764	-0.175718	0.0604504	-2.90681	0.00365133	0.00803988
ANGEL1	ENSG00000013523	protein_coding	1307.74	-0.122398	0.0610898	-2.00357	0.0451161	0.0748146
RNF14	ENSG00000013561	protein_coding	1494.25	-0.315599	0.0535089	-5.89807	3.67781e-09	2.61388e-08
DNASE1L1	ENSG00000013563	protein_coding	882.573	0.0251996	0.0814205	0.3095	0.756942	0.806851
DDX11	ENSG00000013573	protein_coding	1185.33	-0.0180937	0.0893556	-0.202491	0.839533	0.875395
HEBP1	ENSG00000013583	protein_coding	1162.29	0.0190429	0.0705339	0.269982	0.787174	0.831875
GPRC5A	ENSG00000013588	protein_coding	17617.8	0.0693391	0.126787	0.546896	0.58445	0.655067
MAMLD1	ENSG00000013619	protein_coding	110.581	1.15609	0.164922	7.00992	2.38459e-12	2.98449e-11
CD6	ENSG00000013725	protein_coding	315.381	1.65964	0.107818	15.393	1.82437e-53	9.07625e-51
TACC3	ENSG00000013810	protein_coding	2431.57	0.0142748	0.0863377	0.165337	0.868679	0.899012
UFL1	ENSG00000014123	protein_coding	1512.67	-0.428907	0.0769926	-5.57075	2.53639e-08	1.53795e-07
POLA2	ENSG00000014138	protein_coding	1097.06	0.0264508	0.068744	0.384772	0.700406	0.758054
ZC3H3	ENSG00000014164	protein_coding	1333.72	0.147969	0.0964435	1.53425	0.124968	0.181277
CAPN1	ENSG00000014216	protein_coding	12679.8	0.212041	0.090411	2.3453	0.0190118	0.0350806
ACP3	ENSG00000014257	protein_coding	234.134	-0.227421	0.161442	-1.40868	0.158928	0.221935
MDH1	ENSG00000014641	protein_coding	4593.03	-0.234365	0.0603512	-3.88335	0.000103028	0.000318741
SLC30A9	ENSG00000014824	protein_coding	2813.27	-0.32102	0.0674078	-4.76236	1.91338e-06	8.28948e-06
MTMR11	ENSG00000014914	protein_coding	2811.35	-0.206657	0.126119	-1.63859	0.101298	0.151604
COX15	ENSG00000014919	protein_coding	1816.83	-0.145639	0.0522732	-2.78611	0.00533443	0.0112931
CCDC88C	ENSG00000015133	protein_coding	1766.95	0.251035	0.0735151	3.41474	0.000638422	0.00167239
YAF2	ENSG00000015153	protein_coding	589.364	-0.529033	0.0938475	-5.63716	1.72879e-08	1.07975e-07
ZMYND11	ENSG00000015171	protein_coding	2299.03	-0.193134	0.0573345	-3.36854	0.000755673	0.0019502
WAS	ENSG00000015285	protein_coding	279.528	2.257	0.10193	22.1426	1.22924e-108	1.71234e-104
DPEP1	ENSG00000015413	protein_coding	8848.3	-0.58745	0.240075	-2.44694	0.0144074	0.0273837
BID	ENSG00000015475	protein_coding	2149.95	-0.297731	0.0959917	-3.10163	0.00192458	0.00453423
MATR3	ENSG00000015479	protein_coding	178.031	-1.24026	0.164844	-7.52384	5.31888e-14	8.74071e-13
NPC1L1	ENSG00000015520	protein_coding	228.615	0.270705	0.30419	0.889923	0.373507	0.454103
XYLT2	ENSG00000015532	protein_coding	1341.01	-0.0392777	0.0766627	-0.512344	0.608411	0.676776
RGPD5	ENSG00000015568	protein_coding	0.498523	-0.139182	0.28234	-0.492958	0.622042	0.689051
STMN4	ENSG00000015592	protein_coding	2.50019	1.15611	0.313507	3.68767	0.000226317	0.000652532
NUDCD3	ENSG00000015676	protein_coding	3890.44	-0.066196	0.0586218	-1.1292	0.258812	0.334562
ISL1	ENSG00000016082	protein_coding	46.3785	-0.219203	0.292468	-0.749492	0.453561	0.532828
CHDH	ENSG00000016391	protein_coding	2419.98	-0.266398	0.0999546	-2.66519	0.00769445	0.0156816
IL20RA	ENSG00000016402	protein_coding	1062.94	-0.299586	0.102565	-2.92093	0.0034899	0.00772882
CLCA1	ENSG00000016490	protein_coding	6397.41	0.39391	0.367812	1.07096	0.284189	0.361883
CLCA4	ENSG00000016602	protein_coding	510.766	0.523071	0.337308	1.55072	0.120968	0.176265
GLT8D1	ENSG00000016864	protein_coding	1442.57	-0.0940365	0.0469402	-2.00332	0.0451425	0.0748434
ATP2C1	ENSG00000017260	protein_coding	4132.74	-0.152785	0.0468783	-3.25917	0.00111738	0.00277651
IGF1	ENSG00000017427	protein_coding	33.5067	2.00415	0.216798	9.24432	2.36745e-20	8.90509e-19
SLC38A5	ENSG00000017483	protein_coding	3076.78	-0.0668755	0.196548	-0.34025	0.733668	0.787062
RALBP1	ENSG00000017797	protein_coding	2496.75	0.0903249	0.0673931	1.34027	0.180158	0.246732
RUFY3	ENSG00000018189	protein_coding	702.691	-0.41583	0.0915206	-4.54357	5.53099e-06	2.19152e-05
CNTN1	ENSG00000018236	protein_coding	46.9229	1.67154	0.249733	6.69332	2.18165e-11	2.28499e-10
SLC11A1	ENSG00000018280	protein_coding	432.477	1.32826	0.178606	7.43682	1.03136e-13	1.62338e-12
WWTR1	ENSG00000018408	protein_coding	1029.49	0.859579	0.143851	5.97547	2.29432e-09	1.68861e-08
AGPS	ENSG00000018510	protein_coding	2588.37	-0.322759	0.0673604	-4.79152	1.6552e-06	7.25976e-06
ZNF806	ENSG00000018607	transcribed_unprocessed_pseudogene	0.182186	0.093586	0.728815	0.128409	0.897826
CXorf56	ENSG00000018610	protein_coding	953.783	-0.234479	0.0654373	-3.58326	0.000339327	0.000940818
ATP1A2	ENSG00000018625	protein_coding	67.5713	2.3979	0.261026	9.18644	4.06039e-20	1.49107e-18
TTC27	ENSG00000018699	protein_coding	851.673	-0.243807	0.0581942	-4.18953	2.79529e-05	9.67815e-05
ZNF582	ENSG00000018869	protein_coding	23.2376	0.229995	0.156943	1.46547	0.142792	0.202837
VSIG2	ENSG00000019102	protein_coding	951.105	-0.345338	0.28234	-1.22313	0.221281	0.293827
PHLDB1	ENSG00000019144	protein_coding	1650.58	0.728526	0.0932911	7.80916	5.75688e-15	1.10307e-13
MARCO	ENSG00000019169	protein_coding	260.674	2.20059	0.293221	7.50488	6.1483e-14	9.97816e-13
CYP24A1	ENSG00000019186	protein_coding	34.001	0.347614	0.28721	1.21031	0.226159	0.299316
PRDM11	ENSG00000019485	protein_coding	393.377	0.0129754	0.0897838	0.144519	0.885091	0.911999
SYT13	ENSG00000019505	protein_coding	1427.87	-0.204197	0.188113	-1.0855	0.2777	0.35483
SNAI2	ENSG00000019549	protein_coding	248.689	1.0486	0.139311	7.52709	5.18846e-14	8.53644e-13
CD74	ENSG00000019582	protein_coding	45799.1	1.90645	0.141904	13.4348	3.78149e-41	7.86212e-39
HGF	ENSG00000019991	protein_coding	137.545	0.786549	0.167866	4.68558	2.79165e-06	1.17273e-05
ZRANB1	ENSG00000019995	protein_coding	444.97	0.0327869	0.0591893	0.553933	0.579624	0.650782
NCDN	ENSG00000020129	protein_coding	943.758	0.311484	0.0758088	4.10882	3.97688e-05	0.000133725
ADGRA2	ENSG00000020181	protein_coding	1092.31	1.62915	0.110757	14.7092	5.62454e-49	2.00897e-46
CCT8L1P	ENSG00000020219	processed_pseudogene	0.388639	-1.41573	0.492288	-2.87581	0.0040299	0.00878506
ZFP64	ENSG00000020256	protein_coding	1139.1	0.0724445	0.0625693	1.15783	0.246934	0.321576
MNAT1	ENSG00000020426	protein_coding	392.011	-0.410949	0.0759326	-5.41202	6.2316e-08	3.53926e-07
SAMD4A	ENSG00000020577	protein_coding	551.79	0.439542	0.126967	3.46187	0.000536445	0.00142983
RUNX3	ENSG00000020633	protein_coding	613.701	1.22068	0.148015	8.24701	1.62403e-16	3.89824e-15
MRE11	ENSG00000020922	protein_coding	1050.99	-0.490312	0.0788537	-6.218	5.03546e-10	4.16038e-09
PLEKHB1	ENSG00000021300	protein_coding	1534.18	-0.457462	0.175372	-2.60853	0.00909333	0.0181788
SERPINB1	ENSG00000021355	protein_coding	9905.84	-0.327998	0.0990995	-3.30979	0.000933668	0.00235958
CYP3A43	ENSG00000021461	protein_coding	2.08298	-1.47497	0.314709	-4.68677	2.7755e-06	1.16641e-05
SLC7A9	ENSG00000021488	protein_coding	28.0764	0.450394	0.284232	1.5846	0.113058	0.166397
SPAST	ENSG00000021574	protein_coding	1024.92	-0.379999	0.076541	-4.96465	6.88266e-07	3.23357e-06
NRXN3	ENSG00000021645	protein_coding	271.701	-0.117986	0.222342	-0.530651	0.595661	0.664886
OSBPL5	ENSG00000021762	protein_coding	1595.98	0.0744397	0.0857775	0.867823	0.385491	0.466231
AQR	ENSG00000021776	protein_coding	1885.09	-0.239477	0.0587434	-4.07666	4.56866e-05	0.000151937
CPS1	ENSG00000021826	protein_coding	257.053	-0.81648	0.290331	-2.81224	0.0049198	0.0104913
C8B	ENSG00000021852	protein_coding	0.438156	-0.277419	0.567169	-0.489129	0.62475	0.691483
FHL1	ENSG00000022267	protein_coding	926.044	1.20965	0.167603	7.21739	5.29955e-13	7.38227e-12
RTF2	ENSG00000022277	protein_coding	4127.12	-0.247016	0.0777957	-3.17518	0.00149743	0.00361448
GABRA1	ENSG00000022355	protein_coding	0.434421	0.0913206	0.73025	0.125054	0.900481	0.923784
NLRP2	ENSG00000022556	protein_coding	329.988	0.65893	0.314158	2.09745	0.035954	0.0613698
SLC45A4	ENSG00000022567	protein_coding	1317.3	0.00756992	0.0811773	0.0932517	0.925704	0.943516
RNF10	ENSG00000022840	protein_coding	5253	0.0543641	0.0451197	1.20488	0.228248	0.301536
ZNF839	ENSG00000022976	protein_coding	218.023	-0.0277953	0.0812008	-0.342303	0.732123	0.785606
ZDHHC6	ENSG00000023041	protein_coding	1860.93	-0.362651	0.0571409	-6.34661	2.20117e-10	1.93575e-09
GRAMD1B	ENSG00000023171	protein_coding	264.11	0.949059	0.181764	5.22137	1.776e-07	9.29247e-07
RNH1	ENSG00000023191	protein_coding	5903.41	0.155364	0.0874434	1.77673	0.0756121	0.117418
NDUFS1	ENSG00000023228	protein_coding	4480.05	-0.306845	0.0522602	-5.87149	4.31895e-09	3.03037e-08
RB1CC1	ENSG00000023287	protein_coding	2044.64	-0.366247	0.100701	-3.63698	0.000275856	0.00078024
ERP44	ENSG00000023318	protein_coding	3428.91	-0.204843	0.0579403	-3.53541	0.000407151	0.00111215
ALAS1	ENSG00000023330	protein_coding	2797.24	0.0229892	0.0695439	0.330572	0.740968	0.793325
BIRC3	ENSG00000023445	protein_coding	1826.76	0.400821	0.17126	2.34043	0.0192617	0.0354839
AKAP11	ENSG00000023516	protein_coding	2875.14	-0.630827	0.117069	-5.38853	7.10374e-08	3.99012e-07
GLRX2	ENSG00000023572	protein_coding	344.171	-0.481194	0.0746951	-6.44211	1.17827e-10	1.08889e-09
SNAPC1	ENSG00000023608	protein_coding	202.246	-0.196736	0.0783495	-2.511	0.0120389	0.0233387
DERA	ENSG00000023697	protein_coding	1562.83	-0.375712	0.068325	-5.4989	3.82178e-08	2.24662e-07
STRAP	ENSG00000023734	protein_coding	5128.22	-0.176967	0.0635746	-2.78361	0.00537574	0.0113719
ABCC2	ENSG00000023839	protein_coding	253.452	-0.916316	0.226133	-4.05211	5.07588e-05	0.000167248
DEF6	ENSG00000023892	protein_coding	846.279	0.287699	0.0909069	3.16477	0.00155208	0.00373325
PLEKHO1	ENSG00000023902	protein_coding	920.677	1.45053	0.101378	14.3082	1.94611e-46	5.72731e-44
GCLM	ENSG00000023909	protein_coding	887.402	-0.392253	0.0749823	-5.23128	1.68338e-07	8.84555e-07
UBR2	ENSG00000024048	protein_coding	2090.37	-0.221966	0.0709818	-3.12708	0.00176555	0.0041946
EHD2	ENSG00000024422	protein_coding	1846.59	1.76275	0.126928	13.8878	7.51418e-44	1.85809e-41
DEPDC1	ENSG00000024526	protein_coding	607.39	-0.506408	0.115861	-4.37082	1.23781e-05	4.59006e-05
CCDC28A	ENSG00000024862	protein_coding	678.958	-0.325113	0.0692724	-4.69325	2.68898e-06	1.13324e-05
RRAGD	ENSG00000025039	protein_coding	266.294	-0.215922	0.169193	-1.27619	0.201889	0.271756
HSF2	ENSG00000025156	protein_coding	411.605	-0.305786	0.0656166	-4.6602	3.1591e-06	1.31427e-05
PHF20	ENSG00000025293	protein_coding	2046.84	-0.290089	0.0710419	-4.08336	4.439e-05	0.000147978
HSD17B6	ENSG00000025423	protein_coding	87.2132	0.739792	0.142241	5.20098	1.98245e-07	1.02838e-06
NR1H3	ENSG00000025434	protein_coding	1097.6	0.460291	0.0937729	4.90858	9.174e-07	4.21437e-06
TYMP	ENSG00000025708	protein_coding	2692.34	2.06434	0.148811	13.8722	9.34139e-44	2.29633e-41
NCAPH2	ENSG00000025770	protein_coding	1743.53	-0.0349358	0.0909261	-0.384222	0.700814	0.758407
TOMM34	ENSG00000025772	protein_coding	3367.69	-0.336857	0.0911973	-3.69371	0.000221004	0.000638887
SEC63	ENSG00000025796	protein_coding	3173.52	-0.313162	0.0695576	-4.5022	6.7253e-06	2.62517e-05
KPNA6	ENSG00000025800	protein_coding	2533.36	-0.0350379	0.0527588	-0.664116	0.506616	0.583205
VIM	ENSG00000026025	protein_coding	10515.9	1.45859	0.108835	13.4018	5.90246e-41	1.19161e-38
RTEL1-TNFRSF6B	ENSG00000026036	protein_coding	209.921	-0.0830738	0.13935	-0.596153	0.551073	0.624696
FAS	ENSG00000026103	protein_coding	582.113	0.371224	0.126406	2.93675	0.00331674	0.00738133
RNASET2	ENSG00000026297	protein_coding	3407.13	-0.37318	0.0859096	-4.34387	1.39992e-05	5.14399e-05
CD44	ENSG00000026508	protein_coding	12651.7	-0.0298609	0.0793196	-0.376463	0.706573	0.763324
KCNG1	ENSG00000026559	protein_coding	64.4134	-0.230555	0.247282	-0.932356	0.351153	0.431455
AGPAT4	ENSG00000026652	protein_coding	260.47	0.691834	0.154699	4.47212	7.74483e-06	2.98328e-05
SLAMF7	ENSG00000026751	protein_coding	609.601	1.9942	0.172948	11.5307	9.24251e-31	8.41491e-29
BTN3A1	ENSG00000026950	protein_coding	1611.21	0.666443	0.0978964	6.80763	9.92178e-12	1.10745e-10
MIPEP	ENSG00000027001	protein_coding	1664.55	-0.215557	0.0836525	-2.57681	0.00997163	0.0197411
PRKCH	ENSG00000027075	protein_coding	477.973	0.758776	0.100871	7.52225	5.38434e-14	8.83785e-13
INSRR	ENSG00000027644	protein_coding	4.2233	0.83813	0.241276	3.47375	0.000513246	0.00137526
IFNGR1	ENSG00000027697	protein_coding	3548.13	0.0227463	0.0809423	0.281018	0.778696	0.824613
B4GALT7	ENSG00000027847	protein_coding	1298.15	-0.0948883	0.0885545	-1.07153	0.283933	0.361634
SH2D2A	ENSG00000027869	protein_coding	314.762	0.315885	0.106658	2.96166	0.00305988	0.00686379
VRK2	ENSG00000028116	protein_coding	647.397	-0.149723	0.074989	-1.9966	0.0458685	0.0758816
TNFRSF1B	ENSG00000028137	protein_coding	2835.11	0.617215	0.0872454	7.07448	1.50014e-12	1.93849e-11
VEZT	ENSG00000028203	protein_coding	1794.17	-0.20578	0.0649903	-3.16631	0.00154384	0.00371536
POU2F2	ENSG00000028277	protein_coding	193.377	1.57693	0.13649	11.5534	7.0974e-31	6.56196e-29
BRD9	ENSG00000028310	protein_coding	1438.58	0.0502668	0.0617491	0.814049	0.415617	0.495631
SNX1	ENSG00000028528	protein_coding	2798.91	0.0798889	0.0452144	1.76689	0.0772463	0.119613
TBPL1	ENSG00000028839	protein_coding	724.332	-0.482532	0.0724635	-6.65897	2.75753e-11	2.83695e-10
ARNTL2	ENSG00000029153	protein_coding	1147.15	-0.0237836	0.126171	-0.188503	0.850482	0.884473
BCLAF1	ENSG00000029363	protein_coding	4057.35	-0.399585	0.0774491	-5.15932	2.4785e-07	1.26421e-06
SLC39A9	ENSG00000029364	protein_coding	3327.12	-0.280727	0.0575862	-4.87489	1.08867e-06	4.92484e-06
ANK1	ENSG00000029534	protein_coding	66.6729	1.04713	0.170815	6.13018	8.77804e-10	6.92925e-09
IBSP	ENSG00000029559	protein_coding	41.696	0.436061	0.295961	1.47337	0.14065	0.200217
TFB1M	ENSG00000029639	protein_coding	564.497	-0.492502	0.0669187	-7.3597	1.84319e-13	2.78679e-12
RABEP1	ENSG00000029725	protein_coding	1346.68	-0.020383	0.0707552	-0.288078	0.773287	0.820112
HMGB3	ENSG00000029993	protein_coding	2618.84	-0.204433	0.0786172	-2.60036	0.00931261	0.018563
NUP160	ENSG00000030066	protein_coding	2286.16	-0.166546	0.0568722	-2.92843	0.00340674	0.00755867
BAK1	ENSG00000030110	protein_coding	1755.16	0.138857	0.0857949	1.61848	0.10556	0.157022
MUSK	ENSG00000030304	protein_coding	6.41161	0.479429	0.286057	1.67599	0.0937407	0.141658
IKZF2	ENSG00000030419	protein_coding	168.169	-0.096672	0.16679	-0.579603	0.562182	0.635048
GRN	ENSG00000030582	protein_coding	18299.4	0.594422	0.108715	5.46773	4.5584e-08	2.64284e-07
FAM13B	ENSG00000031003	protein_coding	679.639	-0.0495974	0.0868286	-0.57121	0.567858	0.640213
ARHGAP31	ENSG00000031081	protein_coding	672.071	0.945737	0.121012	7.81525	5.48535e-15	1.05443e-13
CENPQ	ENSG00000031691	protein_coding	276.825	-0.517895	0.096703	-5.35553	8.53083e-08	4.72065e-07
SARS1	ENSG00000031698	protein_coding	5773.87	-0.302486	0.0678414	-4.45872	8.24517e-06	3.15999e-05
RANBP3	ENSG00000031823	protein_coding	2295.27	0.118773	0.0543433	2.18561	0.0288443	0.0506196
ARID4A	ENSG00000032219	protein_coding	681.375	-0.112101	0.0840597	-1.33359	0.182339	0.249312
EIPR1	ENSG00000032389	protein_coding	1394.7	-0.165983	0.0700868	-2.36824	0.0178727	0.0331985
PNPLA6	ENSG00000032444	protein_coding	3069.13	0.31129	0.105949	2.93811	0.00330219	0.00735207
IFT88	ENSG00000032742	protein_coding	689.378	-0.611673	0.0862305	-7.09346	1.30804e-12	1.70715e-11
ALG1	ENSG00000033011	protein_coding	1154	0.00766728	0.0698073	0.109835	0.91254	0.93315
ZCCHC8	ENSG00000033030	protein_coding	839.39	-0.184234	0.0515383	-3.57469	0.000350641	0.000969325
ABCF2	ENSG00000033050	protein_coding	2885.88	-0.112508	0.0610973	-1.84146	0.0655547	0.103652
CHPF2	ENSG00000033100	protein_coding	2700.63	0.158214	0.0666277	2.37459	0.0175683	0.0327
LRRC7	ENSG00000033122	protein_coding	19.0119	-0.46418	0.159359	-2.9128	0.0035821	0.00790035
FUT8	ENSG00000033170	protein_coding	1803.1	-0.00513553	0.109839	-0.0467552	0.962708	0.971895
UBA6	ENSG00000033178	protein_coding	2011.51	-0.521913	0.0962213	-5.42409	5.82511e-08	3.32602e-07
GAB2	ENSG00000033327	protein_coding	1221.83	0.346895	0.075058	4.62169	3.80625e-06	1.55472e-05
ATP6V0A1	ENSG00000033627	protein_coding	2546.28	0.00356091	0.0586481	0.0607165	0.951585	0.963451
PIAS1	ENSG00000033800	protein_coding	1142.86	-0.00351543	0.0658743	-0.0533657	0.957441	0.967909
SLC4A7	ENSG00000033867	protein_coding	908.827	-0.559248	0.13181	-4.24284	2.20708e-05	7.7966e-05
APBA2	ENSG00000034053	protein_coding	170.383	1.23175	0.144002	8.55369	1.1922e-17	3.31704e-16
MAP2K3	ENSG00000034152	protein_coding	3080.74	-0.0123004	0.0928316	-0.132502	0.894587	0.919698
EFCAB1	ENSG00000034239	protein_coding	3.60697	0.756832	0.198911	3.80489	0.00014187	0.000426191
TMSB10	ENSG00000034510	protein_coding	51608.7	-0.23756	0.0832434	-2.8538	0.00431993	0.00934033
ASTE1	ENSG00000034533	protein_coding	323.989	-0.262343	0.05907	-4.44122	8.94482e-06	3.40441e-05
RNF19A	ENSG00000034677	protein_coding	1521.11	0.0854901	0.0738673	1.15735	0.247131	0.321802
PEX3	ENSG00000034693	protein_coding	502.916	-0.356304	0.0705448	-5.05075	4.40085e-07	2.14624e-06
GABARAPL2	ENSG00000034713	protein_coding	2155.98	-0.213708	0.0619113	-3.45184	0.00055678	0.00147817
MYOC	ENSG00000034971	protein_coding	6.92882	2.46077	0.408675	6.02134	1.72976e-09	1.30681e-08
SH3YL1	ENSG00000035115	protein_coding	3197.88	-0.72817	0.0892724	-8.15672	3.44247e-16	7.94811e-15
FAM136A	ENSG00000035141	protein_coding	2355.47	-0.321585	0.0514132	-6.25492	3.97722e-10	3.35435e-09
VCL	ENSG00000035403	protein_coding	6255.73	0.339844	0.0786192	4.32265	1.54163e-05	5.61731e-05
DEPDC1B	ENSG00000035499	protein_coding	617.937	-0.414629	0.089826	-4.61591	3.91372e-06	1.59301e-05
DAPK2	ENSG00000035664	protein_coding	889.343	-0.618555	0.124479	-4.96916	6.72449e-07	3.16709e-06
NSMAF	ENSG00000035681	protein_coding	1571.74	-0.130997	0.0567874	-2.30679	0.0210665	0.0383954
ADSS2	ENSG00000035687	protein_coding	2425.06	-0.321954	0.0554529	-5.80591	6.40172e-09	4.34369e-08
STAP1	ENSG00000035720	protein_coding	19.169	1.18761	0.217915	5.44989	5.03996e-08	2.9039e-07
TIMP2	ENSG00000035862	protein_coding	7188.41	1.63428	0.125221	13.0511	6.25956e-39	1.08995e-36
RFC1	ENSG00000035928	protein_coding	1713.58	-0.106972	0.0593498	-1.80241	0.0714817	0.111739
TBC1D23	ENSG00000036054	protein_coding	1304.36	-0.303039	0.0683137	-4.43599	9.16501e-06	3.48314e-05
CUL3	ENSG00000036257	protein_coding	2502.72	-0.259996	0.0420018	-6.19012	6.01187e-10	4.89643e-09
MYOM2	ENSG00000036448	protein_coding	74.4803	0.0452754	0.147848	0.306229	0.759431	0.808864
OTC	ENSG00000036473	protein_coding	89.8274	-0.33072	0.289426	-1.14268	0.253173	0.328483
CYP46A1	ENSG00000036530	protein_coding	7.95483	0.90058	0.180519	4.98884	6.07438e-07	2.88661e-06
ZZZ3	ENSG00000036549	protein_coding	1427.9	-0.475616	0.0720087	-6.60498	3.97575e-11	3.98433e-10
SLC18A1	ENSG00000036565	protein_coding	119.419	-1.89715	0.301465	-6.29308	3.11226e-10	2.67066e-09
USP2	ENSG00000036672	protein_coding	75.0168	0.572229	0.157515	3.63286	0.000280298	0.000791517
CASR	ENSG00000036828	protein_coding	1.73696	0.792625	0.304742	2.60097	0.00929611	0.0185354
TUBG2	ENSG00000037042	protein_coding	275.542	0.338618	0.0892167	3.79545	0.000147375	0.000441175
RPL26L1	ENSG00000037241	protein_coding	634.317	-0.227078	0.0804499	-2.8226	0.00476355	0.0101961
FLT4	ENSG00000037280	protein_coding	278.25	1.34162	0.113496	11.8209	3.04395e-32	3.08007e-30
NSUN2	ENSG00000037474	protein_coding	3320.07	-0.165647	0.0480263	-3.44909	0.000562481	0.0014915
FBXO42	ENSG00000037637	protein_coding	903.874	0.0521641	0.0434961	1.19928	0.230419	0.303876
MFAP3	ENSG00000037749	protein_coding	532.111	-0.0220796	0.0935393	-0.236046	0.813397	0.853917
MRI1	ENSG00000037757	protein_coding	760	-0.046135	0.0773675	-0.596309	0.550968	0.624663
METTL1	ENSG00000037897	protein_coding	838.619	-0.291844	0.0762855	-3.82568	0.000130411	0.000394202
HOXC8	ENSG00000037965	protein_coding	15.6291	1.56028	0.296915	5.25497	1.48046e-07	7.86331e-07
AGA	ENSG00000038002	protein_coding	590.168	-0.277709	0.0819472	-3.38888	0.000701792	0.00182308
PI4K2B	ENSG00000038210	protein_coding	1175.86	-0.478816	0.0834963	-5.73458	9.77538e-09	6.39901e-08
BOD1L1	ENSG00000038219	protein_coding	1562.79	-0.132662	0.0919988	-1.44199	0.149304	0.210612
MAT2B	ENSG00000038274	protein_coding	3048.16	-0.0320055	0.0583532	-0.548479	0.583363	0.654038
TLL1	ENSG00000038295	protein_coding	32.8224	1.32962	0.235316	5.65034	1.6013e-08	1.00705e-07
EDC4	ENSG00000038358	protein_coding	1739.5	0.154167	0.0722806	2.13289	0.0329337	0.056839
TRIO	ENSG00000038382	protein_coding	3756.08	0.0667334	0.0857454	0.778274	0.436408	0.516057
VCAN	ENSG00000038427	protein_coding	4990.13	0.904798	0.188545	4.79885	1.59576e-06	7.01597e-06
CLEC16A	ENSG00000038532	protein_coding	1247.28	0.111264	0.0578265	1.92409	0.0543432	0.0878768
MSR1	ENSG00000038945	protein_coding	786.404	1.03243	0.209158	4.93612	7.96926e-07	3.69383e-06
CDH1	ENSG00000039068	protein_coding	22163.8	-0.269166	0.0761575	-3.53433	0.000408808	0.00111639
MTREX	ENSG00000039123	protein_coding	2374.1	-0.275502	0.0608998	-4.52386	6.07229e-06	2.38991e-05
DNAH5	ENSG00000039139	protein_coding	61.2331	0.0624099	0.166117	0.375699	0.707141	0.763839
ZFYVE16	ENSG00000039319	protein_coding	1277.39	-0.499505	0.0947152	-5.27376	1.33657e-07	7.15633e-07
RIPOR1	ENSG00000039523	protein_coding	1710.26	0.821791	0.094789	8.66969	4.33299e-18	1.28331e-16
C6	ENSG00000039537	protein_coding	15.5643	0.982481	0.272974	3.59917	0.000319231	0.000890684
RAI14	ENSG00000039560	protein_coding	1217.46	0.548875	0.114908	4.77666	1.78229e-06	7.77067e-06
SOX30	ENSG00000039600	protein_coding	64.065	0.695928	0.165888	4.19517	2.72673e-05	9.46718e-05
PNKP	ENSG00000039650	protein_coding	1337.5	-0.0342993	0.0750924	-0.456761	0.647843	0.711707
BEST2	ENSG00000039987	protein_coding	79.5969	0.386262	0.327716	1.17865	0.238537	0.3125
PHLPP2	ENSG00000040199	protein_coding	655.563	-0.225422	0.0947497	-2.37913	0.0173534	0.0323388
SPDL1	ENSG00000040275	protein_coding	546.135	-0.263195	0.0741263	-3.55063	0.000384308	0.00105424
STAU2	ENSG00000040341	protein_coding	1299.38	-0.371103	0.0819825	-4.52661	5.99365e-06	2.36052e-05
SLC66A1	ENSG00000040487	protein_coding	501.267	0.160911	0.0885146	1.8179	0.0690796	0.108472
CTNS	ENSG00000040531	protein_coding	477.332	0.476861	0.0553596	8.61389	7.06234e-18	2.02842e-16
RTN4R	ENSG00000040608	protein_coding	346.787	0.312744	0.157737	1.98269	0.0474023	0.0780761
PHF23	ENSG00000040633	protein_coding	1198.85	0.219272	0.0662016	3.31219	0.000925702	0.002341
CDH10	ENSG00000040731	protein_coding	0.751034	0.711364	0.38911	1.82818	0.0675223	0.106357
INPP4A	ENSG00000040933	protein_coding	811.204	0.21126	0.0676606	3.12235	0.00179416	0.00425526
RAB27B	ENSG00000041353	protein_coding	590.169	-0.040367	0.199714	-0.202124	0.83982	0.875607
PSMA4	ENSG00000041357	protein_coding	4490.16	-0.227018	0.0745763	-3.04411	0.00233371	0.00538578
MYO16	ENSG00000041515	protein_coding	13.0211	0.0134289	0.198075	0.0677971	0.945947	0.959144
LSG1	ENSG00000041802	protein_coding	1886.33	-0.229838	0.0400045	-5.7453	9.17604e-09	6.04361e-08
PARP3	ENSG00000041880	protein_coding	877.533	0.419812	0.0940903	4.46179	8.1276e-06	3.11894e-05
TNC	ENSG00000041982	protein_coding	5382.62	1.68924	0.193826	8.71523	2.90165e-18	8.79972e-17
THAP3	ENSG00000041988	protein_coding	376.066	-0.0966325	0.0737865	-1.30962	0.190324	0.258545
RIPOR3	ENSG00000042062	protein_coding	96.6864	0.806898	0.147008	5.4888	4.04679e-08	2.3679e-07
TDP1	ENSG00000042088	protein_coding	803.02	-0.123805	0.0547759	-2.26021	0.0238083	0.0427989
AIFM2	ENSG00000042286	protein_coding	1371.47	0.0107939	0.0790228	0.136593	0.891353	0.917023
C2orf83	ENSG00000042304	protein_coding	0.435399	-1.15777	0.496153	-2.33349	0.0196222	0.0360698
SPATA7	ENSG00000042317	protein_coding	236.049	-0.353934	0.0793936	-4.45797	8.27405e-06	3.1699e-05
MED17	ENSG00000042429	protein_coding	1056.15	-0.124236	0.0471197	-2.6366	0.00837418	0.0168955
RETSAT	ENSG00000042445	protein_coding	3729.31	0.00245358	0.0800145	0.0306642	0.975537	0.981503
CAPG	ENSG00000042493	protein_coding	6252.74	0.222421	0.114758	1.93818	0.0526014	0.0855102
AP2S1	ENSG00000042753	protein_coding	3205.64	-0.0784924	0.0911549	-0.861089	0.389189	0.469847
USH2A	ENSG00000042781	protein_coding	13.8065	-1.62074	0.200257	-8.09332	5.80616e-16	1.2927e-14
ZPBP	ENSG00000042813	protein_coding	0.977579	-1.10313	0.45946	-2.40093	0.0163534	0.0306613
TG	ENSG00000042832	protein_coding	380.434	-1.26775	0.210116	-6.03356	1.60383e-09	1.21619e-08
ADAM28	ENSG00000042980	protein_coding	311.558	0.61076	0.171052	3.57061	0.000356149	0.000983056
BARX2	ENSG00000043039	protein_coding	250.395	0.363871	0.229265	1.58712	0.112486	0.16569
DCUN1D1	ENSG00000043093	protein_coding	1161.64	-0.536535	0.0874752	-6.13356	8.59317e-10	6.79615e-09
JADE2	ENSG00000043143	protein_coding	1674.43	0.505119	0.074611	6.77002	1.28761e-11	1.40788e-10
ZIC2	ENSG00000043355	protein_coding	250.676	0.909818	0.33109	2.74794	0.00599701	0.0125427
LCP2	ENSG00000043462	protein_coding	809.65	1.41679	0.146686	9.65865	4.51789e-22	2.00427e-20
TRIT1	ENSG00000043514	protein_coding	827.657	-0.337387	0.0610969	-5.52216	3.34858e-08	1.98662e-07
ADRB1	ENSG00000043591	protein_coding	44.0611	0.621958	0.227666	2.73189	0.00629719	0.0130958
GUCA2B	ENSG00000044012	protein_coding	37.2151	1.25285	0.336802	3.71986	0.000199337	0.000581562
CUL7	ENSG00000044090	protein_coding	1622.09	0.065154	0.0788188	0.826631	0.408446	0.488439
CTNNA1	ENSG00000044115	protein_coding	15286.7	-0.115148	0.0587984	-1.95835	0.050189	0.0820932
PHKA2	ENSG00000044446	protein_coding	1249.76	-0.347974	0.087487	-3.97744	6.96611e-05	0.000223161
CNTLN	ENSG00000044459	protein_coding	211.353	-0.0603674	0.161036	-0.374869	0.707758	0.764387
EPHA3	ENSG00000044524	protein_coding	134.727	0.852065	0.172941	4.92692	8.3538e-07	3.8588e-06
HSPA5	ENSG00000044574	protein_coding	25047.8	0.1292	0.0701362	1.84212	0.0654569	0.103517
DSG2	ENSG00000046604	protein_coding	13767.2	-0.25544	0.076342	-3.346	0.000819858	0.00209938
GEMIN8	ENSG00000046647	protein_coding	655.842	-0.354229	0.0774772	-4.57204	4.83002e-06	1.93506e-05
OFD1	ENSG00000046651	protein_coding	1364.84	-0.483987	0.0831543	-5.82035	5.87237e-09	4.02042e-08
GPM6B	ENSG00000046653	protein_coding	129.902	-0.347035	0.167434	-2.07267	0.0382034	0.0647098
MAGEC2	ENSG00000046774	protein_coding	1.95971	0.340126	0.778403	0.436953	0.662145	0.724202
PREX2	ENSG00000046889	protein_coding	120.891	0.493357	0.173954	2.83613	0.00456641	0.00981738
WDR37	ENSG00000047056	protein_coding	653.76	0.0389361	0.0588688	0.661405	0.508353	0.58472
YTHDC2	ENSG00000047188	protein_coding	1064.37	-0.177015	0.0796965	-2.22111	0.0263432	0.0467288
CTPS2	ENSG00000047230	protein_coding	1609.81	-0.56355	0.0727869	-7.74246	9.75085e-15	1.80784e-13
ATP6V1H	ENSG00000047249	protein_coding	1779.9	-0.16757	0.0640932	-2.61447	0.00893657	0.017898
POLR2B	ENSG00000047315	protein_coding	3616.06	-0.114278	0.0514944	-2.21923	0.0264707	0.0469171
FAM214A	ENSG00000047346	protein_coding	600.142	-0.105597	0.0983902	-1.07325	0.28316	0.360781
ARAP2	ENSG00000047365	protein_coding	744.758	-0.352206	0.110955	-3.17432	0.00150188	0.0036246
TPR	ENSG00000047410	protein_coding	4352.23	-0.221426	0.0717331	-3.0868	0.00202321	0.00474001
CP	ENSG00000047457	protein_coding	116.258	1.23378	0.23692	5.20757	1.91329e-07	9.95598e-07
KIAA0556	ENSG00000047578	protein_coding	974.585	0.0321795	0.0666944	0.482492	0.629456	0.695748
DTNBP1	ENSG00000047579	protein_coding	799.474	-0.0609286	0.0552361	-1.10306	0.270002	0.346573
XK	ENSG00000047597	protein_coding	1185.9	-0.406337	0.116826	-3.47813	0.000504933	0.0013549
ANO2	ENSG00000047617	protein_coding	21.5696	0.22273	0.153918	1.44707	0.147878	0.208904
C12orf4	ENSG00000047621	protein_coding	545.491	-0.181047	0.0780462	-2.31974	0.0203551	0.0372533
SCML1	ENSG00000047634	protein_coding	1276.01	-0.803689	0.120687	-6.65927	2.75193e-11	2.8319e-10
WWC3	ENSG00000047644	protein_coding	1491.18	0.099741	0.0851492	1.17137	0.241451	0.315665
ARHGAP6	ENSG00000047648	protein_coding	224.725	-0.0558006	0.193492	-0.288387	0.773051	0.819944
FAM184B	ENSG00000047662	protein_coding	25.2839	-0.974248	0.204531	-4.76333	1.90422e-06	8.25473e-06
MAP4	ENSG00000047849	protein_coding	8790.03	0.313938	0.0485454	6.4669	1.00035e-10	9.34186e-10
GOPC	ENSG00000047932	protein_coding	1576.01	-0.362196	0.0680765	-5.32042	1.03525e-07	5.66125e-07
ROS1	ENSG00000047936	protein_coding	19.5003	-0.0877826	0.311962	-0.281388	0.778413	0.824398
USP28	ENSG00000048028	protein_coding	909.965	-0.128481	0.0587007	-2.18875	0.0286149	0.05027
HDAC9	ENSG00000048052	protein_coding	188.669	0.525362	0.181997	2.88665	0.00389361	0.00851594
TSPAN17	ENSG00000048140	protein_coding	1988.1	0.0854454	0.0653601	1.3073	0.19111	0.259462
NOP16	ENSG00000048162	protein_coding	1362.2	-0.367699	0.077194	-4.76332	1.90438e-06	8.25473e-06
CC2D2A	ENSG00000048342	protein_coding	285.199	-0.187291	0.143627	-1.304	0.192232	0.260697
RRM2B	ENSG00000048392	protein_coding	1148.27	-0.0475447	0.103864	-0.457757	0.647127	0.711145
ZNF800	ENSG00000048405	protein_coding	1089.91	-0.59788	0.0847642	-7.05345	1.7453e-12	2.23115e-11
TNFRSF17	ENSG00000048462	protein_coding	52.1629	1.62892	0.227857	7.1489	8.74788e-13	1.17322e-11
SNX29	ENSG00000048471	protein_coding	578.506	0.593755	0.0831449	7.14121	9.2514e-13	1.23678e-11
LMO3	ENSG00000048540	protein_coding	92.7022	0.452397	0.234275	1.93105	0.0534763	0.0866898
MRPS10	ENSG00000048544	protein_coding	1712.43	-0.485523	0.066784	-7.27005	3.59354e-13	5.1553e-12
GUCA1A	ENSG00000048545	protein_coding	5.38452	1.61128	0.252543	6.38023	1.76827e-10	1.57734e-09
RSF1	ENSG00000048649	protein_coding	1566.98	-0.252788	0.0843929	-2.99537	0.00274115	0.00622873
VPS13D	ENSG00000048707	protein_coding	2084.68	-0.138243	0.0965515	-1.43181	0.152199	0.213997
CELF2	ENSG00000048740	protein_coding	1702.17	-0.0752866	0.108986	-0.69079	0.489698	0.567209
FAM120A	ENSG00000048828	protein_coding	10198.4	-0.140204	0.0448	-3.12954	0.00175078	0.00416188
R3HDM1	ENSG00000048991	protein_coding	1567.52	-0.0510476	0.0685744	-0.744411	0.456628	0.535618
COL9A2	ENSG00000049089	protein_coding	653.54	0.0391558	0.183966	0.212843	0.83145	0.868896
KITLG	ENSG00000049130	protein_coding	974.759	-0.215667	0.126045	-1.71103	0.0870751	0.132727
ERCC8	ENSG00000049167	protein_coding	299.746	-0.481942	0.0729328	-6.60802	3.89482e-11	3.90791e-10
ADAMTS6	ENSG00000049192	protein_coding	107.325	0.000937158	0.174427	0.00537276	0.995713	0.996476
H6PD	ENSG00000049239	protein_coding	3327.13	0.203912	0.0751051	2.71503	0.006627	0.0137121
VAMP3	ENSG00000049245	protein_coding	3802.28	-0.0124104	0.0584167	-0.212446	0.831759	0.869154
PER3	ENSG00000049246	protein_coding	331.875	0.386803	0.137157	2.82015	0.00480008	0.0102654
UTS2	ENSG00000049247	protein_coding	34.4153	-0.69174	0.257302	-2.68844	0.00717871	0.014738
TNFRSF9	ENSG00000049249	protein_coding	132.269	1.5619	0.155936	10.0163	1.29274e-23	6.60438e-22
EPN3	ENSG00000049283	protein_coding	866.293	-0.344055	0.137297	-2.50592	0.0122132	0.023639
LTBP1	ENSG00000049323	protein_coding	2319.3	0.955693	0.130075	7.34725	2.02322e-13	3.04139e-12
RCN1	ENSG00000049449	protein_coding	5536.85	-0.397443	0.0792043	-5.01794	5.22272e-07	2.51333e-06
ELN	ENSG00000049540	protein_coding	1834.77	1.5742	0.157995	9.96361	2.1993e-23	1.09676e-21
RFC2	ENSG00000049541	protein_coding	1360.16	-0.204341	0.0760174	-2.68808	0.00718642	0.0147507
ARID1B	ENSG00000049618	protein_coding	2816.39	0.042075	0.0533098	0.789255	0.429963	0.509879
CLPTM1L	ENSG00000049656	protein_coding	5102.43	0.061907	0.0650327	0.951936	0.341129	0.421345
NEDD4L	ENSG00000049759	protein_coding	2137.62	-0.26479	0.0810568	-3.26672	0.00108803	0.00271067
PPP1R3F	ENSG00000049769	protein_coding	87.0361	0.219136	0.120084	1.82486	0.0680226	0.10704
HEXB	ENSG00000049860	protein_coding	6195.22	-0.254534	0.0604214	-4.21264	2.52404e-05	8.82029e-05
PTCD2	ENSG00000049883	protein_coding	423.259	-0.312421	0.0618637	-5.05016	4.41449e-07	2.15214e-06
NEXMIF	ENSG00000050030	protein_coding	11.5178	0.387574	0.294559	1.31578	0.188249	0.256035
JKAMP	ENSG00000050130	protein_coding	1070.55	-0.153959	0.0634704	-2.42568	0.0152797	0.0288592
DKK3	ENSG00000050165	protein_coding	1946.79	1.18309	0.112264	10.5384	5.7467e-26	3.6609e-24
ARHGEF5	ENSG00000050327	protein_coding	895.556	-0.258841	0.0797338	-3.24632	0.00116909	0.00289159
NFE2L3	ENSG00000050344	protein_coding	4874.11	-0.41622	0.0874622	-4.75885	1.94696e-06	8.42185e-06
MCUR1	ENSG00000050393	protein_coding	1703.13	-0.313715	0.0607923	-5.16043	2.46383e-07	1.25765e-06
LIMA1	ENSG00000050405	protein_coding	5588.35	-0.0984018	0.100726	-0.97693	0.328604	0.408009
LETMD1	ENSG00000050426	protein_coding	2271.94	-0.294338	0.0560342	-5.25283	1.49778e-07	7.94722e-07
SLC4A8	ENSG00000050438	protein_coding	158.524	-0.323635	0.152176	-2.12672	0.0334437	0.057605
LAMC3	ENSG00000050555	protein_coding	117.23	1.1769	0.147795	7.96306	1.67835e-15	3.48081e-14
PTGER3	ENSG00000050628	protein_coding	150.055	1.10468	0.19183	5.75866	8.47856e-09	5.61965e-08
TNIP3	ENSG00000050730	protein_coding	41.2939	0.550586	0.179216	3.07219	0.00212492	0.0049562
MAPK9	ENSG00000050748	protein_coding	1841.94	-0.365213	0.0414971	-8.80091	1.35707e-18	4.25446e-17
COL23A1	ENSG00000050767	protein_coding	34.7821	1.43854	0.133947	10.7396	6.6313e-27	4.52813e-25
BCAR1	ENSG00000050820	protein_coding	3749.25	0.304827	0.0968909	3.14609	0.00165472	0.00395441
FAM160A2	ENSG00000051009	protein_coding	2212.5	-0.0673296	0.0675408	-0.996874	0.318826	0.398044
HERPUD1	ENSG00000051108	protein_coding	3800.55	0.165216	0.0636208	2.59688	0.0094074	0.0187279
HOMER3	ENSG00000051128	protein_coding	407.009	0.417155	0.131363	3.17559	0.00149533	0.00361047
RAD51	ENSG00000051180	protein_coding	604.699	-0.189758	0.0888178	-2.13649	0.0326399	0.0563808
POLQ	ENSG00000051341	protein_coding	510.66	-0.663394	0.107768	-6.15574	7.47281e-10	5.99057e-09
PIK3CB	ENSG00000051382	protein_coding	1870.54	-0.312789	0.0660167	-4.73802	2.15812e-06	9.24717e-06
CYBA	ENSG00000051523	protein_coding	8450.18	0.200223	0.141896	1.41106	0.158228	0.221133
THOC3	ENSG00000051596	protein_coding	532.011	-0.274839	0.0831352	-3.30593	0.000946627	0.00238973
HEBP2	ENSG00000051620	protein_coding	3195.47	-0.440345	0.0628644	-7.00467	2.4756e-12	3.08545e-11
MPHOSPH9	ENSG00000051825	protein_coding	579.568	-0.337599	0.101885	-3.31352	0.000921284	0.00233152
PLEKHA5	ENSG00000052126	protein_coding	1209.3	-0.353585	0.0694029	-5.09466	3.49361e-07	1.73374e-06
PRSS8	ENSG00000052344	protein_coding	8928.52	-0.241702	0.127906	-1.88969	0.0587996	0.0941759
SIKE1	ENSG00000052723	protein_coding	1218.87	-0.462458	0.0644915	-7.17083	7.45439e-13	1.01175e-11
RRP12	ENSG00000052749	protein_coding	2261.93	-0.0380205	0.0728308	-0.522039	0.601643	0.670346
FNIP2	ENSG00000052795	protein_coding	1450.09	-0.241959	0.095258	-2.54004	0.011084	0.0216955
MSMO1	ENSG00000052802	protein_coding	3290.83	-0.611509	0.099357	-6.15467	7.52356e-10	6.02895e-09
TTC17	ENSG00000052841	protein_coding	2634.21	-0.412487	0.0536112	-7.69406	1.4254e-14	2.57645e-13
ALX4	ENSG00000052850	protein_coding	3.57014	-1.63621	0.310718	-5.2659	1.39507e-07	7.44668e-07
FSTL4	ENSG00000053108	protein_coding	38.4289	-0.39386	0.268746	-1.46555	0.142772	0.202816
FOXN3	ENSG00000053254	protein_coding	1582.85	0.250189	0.0947955	2.63925	0.00830906	0.0167803
METTL24	ENSG00000053328	protein_coding	11.7569	0.959123	0.224493	4.27241	1.93376e-05	6.91941e-05
AKR7A2	ENSG00000053371	protein_coding	1815.69	0.0449937	0.0896316	0.501985	0.615678	0.683215
MRTO4	ENSG00000053372	protein_coding	2273.55	-0.293222	0.0811647	-3.61268	0.000303052	0.000849855
NNAT	ENSG00000053438	protein_coding	66.4105	0.192442	0.174318	1.10397	0.269606	0.346157
USE1	ENSG00000053501	protein_coding	716.244	-0.285241	0.0891186	-3.20069	0.00137099	0.00333705
MCF2L2	ENSG00000053524	protein_coding	29.4912	0.051029	0.132317	0.385656	0.699751	0.757522
NRIP2	ENSG00000053702	protein_coding	146.439	0.0941375	0.102533	0.918117	0.358558	0.438971
LAMA3	ENSG00000053747	protein_coding	3407.13	0.41012	0.157276	2.60764	0.00911683	0.0182188
AP5M1	ENSG00000053770	protein_coding	1616.65	-0.355094	0.081534	-4.35516	1.3297e-05	4.9044e-05
ANAPC4	ENSG00000053900	protein_coding	874.277	-0.39412	0.0584492	-6.74295	1.55207e-11	1.67124e-10
KCNQ1	ENSG00000053918	protein_coding	5361.91	-0.319637	0.14043	-2.27613	0.0228382	0.0412396
TRAPPC3	ENSG00000054116	protein_coding	1742.59	-0.180909	0.0529734	-3.4151	0.00063759	0.00167053
THRAP3	ENSG00000054118	protein_coding	4802.4	0.0486192	0.0491261	0.989683	0.322329	0.401698
PHPT1	ENSG00000054148	protein_coding	2691.58	-0.23494	0.120468	-1.95024	0.0511481	0.0834684
ENTPD2	ENSG00000054179	protein_coding	1336.79	-0.106284	0.164503	-0.646089	0.518222	0.594207
LY75	ENSG00000054219	protein_coding	1390.89	-0.578152	0.0972277	-5.94637	2.74154e-09	1.99112e-08
ARID4B	ENSG00000054267	protein_coding	1253.29	-0.163262	0.0857198	-1.9046	0.0568318	0.0913918
OPN3	ENSG00000054277	protein_coding	232.116	0.110024	0.0906915	1.21317	0.225065	0.298056
SDCCAG8	ENSG00000054282	protein_coding	627.293	-0.19137	0.0627624	-3.04912	0.00229514	0.00530467
PTPRN	ENSG00000054356	protein_coding	69.9766	1.49908	0.212844	7.04309	1.88027e-12	2.38907e-11
HHAT	ENSG00000054392	protein_coding	176.917	-0.179644	0.10724	-1.67516	0.0939027	0.141888
KIF1B	ENSG00000054523	protein_coding	2306.37	-0.0320004	0.0804545	-0.397745	0.690818	0.749696
FOXC1	ENSG00000054598	protein_coding	228.907	0.711455	0.183882	3.86909	0.000109242	0.000335877
TBC1D22A	ENSG00000054611	protein_coding	1411.44	0.171425	0.0603886	2.8387	0.00452981	0.0097482
SYNE2	ENSG00000054654	protein_coding	4416.12	-0.247508	0.117875	-2.09974	0.0357517	0.061072
PLEKHH1	ENSG00000054690	protein_coding	1456.49	-0.188135	0.100048	-1.88046	0.0600459	0.0959293
ATP9A	ENSG00000054793	protein_coding	7784.73	-0.195854	0.120076	-1.63108	0.102874	0.153611
SPO11	ENSG00000054796	protein_coding	0.351996	-1.08314	0.850664	-1.27328	0.202917	0.272929
CBLN4	ENSG00000054803	protein_coding	4.7485	0.705244	0.344749	2.04567	0.0407884	0.0684805
CHRDL2	ENSG00000054938	protein_coding	414.838	2.95556	0.264035	11.1938	4.37189e-29	3.56839e-27
FAM168A	ENSG00000054965	protein_coding	1551.03	0.460316	0.0632358	7.27935	3.35427e-13	4.84364e-12
RELT	ENSG00000054967	protein_coding	390.192	0.711942	0.0881431	8.07712	6.63137e-16	1.46395e-14
GALC	ENSG00000054983	protein_coding	1095.19	-0.00412589	0.145903	-0.0282783	0.97744	0.982819
NOP58	ENSG00000055044	protein_coding	3553.01	-0.464639	0.0663615	-7.00163	2.53001e-12	3.15139e-11
SZRD1	ENSG00000055070	protein_coding	4565.51	0.194186	0.0631955	3.07279	0.00212071	0.00494749
KCNH2	ENSG00000055118	protein_coding	583.344	0.186751	0.163653	1.14114	0.253813	0.329126
CUL1	ENSG00000055130	protein_coding	2816.68	-0.187286	0.0462549	-4.04899	5.14391e-05	0.000169356
FAM114A2	ENSG00000055147	protein_coding	503.462	-0.114681	0.0663543	-1.72831	0.083932	0.128443
CYFIP2	ENSG00000055163	protein_coding	1643.85	0.159592	0.103737	1.53843	0.123944	0.179979
TAB2	ENSG00000055208	protein_coding	2545.17	-0.0278003	0.0596637	-0.46595	0.641252	0.705802
GINM1	ENSG00000055211	protein_coding	1100.57	-0.0245317	0.0656073	-0.373918	0.708465	0.765033
EIF2AK2	ENSG00000055332	protein_coding	3070.15	-0.0595218	0.0841961	-0.706942	0.479603	0.557513
USP36	ENSG00000055483	protein_coding	2379.75	-0.0372992	0.0663718	-0.561974	0.574134	0.645996
KMT2C	ENSG00000055609	protein_coding	2905.11	-0.374507	0.111178	-3.36855	0.000755645	0.0019502
MCOLN3	ENSG00000055732	protein_coding	99.7785	-0.529817	0.215533	-2.45817	0.0139648	0.0266272
CCDC85A	ENSG00000055813	protein_coding	9.18265	0.897487	0.218301	4.11124	3.93544e-05	0.000132471
PUM2	ENSG00000055917	protein_coding	5229.4	-0.342452	0.0559307	-6.12279	9.19531e-10	7.23812e-09
MRPL43	ENSG00000055950	protein_coding	2147.34	-0.0764488	0.095216	-0.802899	0.422033	0.502014
ITIH4	ENSG00000055955	protein_coding	5.92002	0.539384	0.191337	2.81903	0.00481687	0.0102981
ITIH1	ENSG00000055957	protein_coding	2.39066	1.0965	0.243363	4.50561	6.61821e-06	2.58772e-05
HPF1	ENSG00000056050	protein_coding	462.239	-0.197069	0.0820696	-2.40125	0.0163393	0.0306362
ZFR	ENSG00000056097	protein_coding	3364.79	-0.134145	0.047563	-2.82037	0.0047969	0.0102591
ZNF280C	ENSG00000056277	protein_coding	250.377	-0.546105	0.0949089	-5.75399	8.71621e-09	5.76711e-08
NPFFR2	ENSG00000056291	protein_coding	2.74863	1.22069	0.266156	4.58637	4.51023e-06	1.81757e-05
PHF21B	ENSG00000056487	protein_coding	1.32953	0.720305	0.308505	2.33482	0.0195526	0.0359594
TRAF1	ENSG00000056558	protein_coding	484.919	0.764137	0.0854485	8.94266	3.79912e-19	1.26004e-17
RC3H2	ENSG00000056586	protein_coding	1854.12	-0.335339	0.079051	-4.24205	2.21483e-05	7.82002e-05
IL17RB	ENSG00000056736	protein_coding	935.506	-0.415544	0.112598	-3.69052	0.000223797	0.000646023
TRAF3IP2	ENSG00000056972	protein_coding	1330.04	-0.13746	0.0672272	-2.04471	0.0408834	0.0686176
GYG2	ENSG00000056998	protein_coding	678.432	-0.442207	0.153587	-2.87919	0.00398693	0.00870045
DCBLD2	ENSG00000057019	protein_coding	1124.11	0.352528	0.146563	2.4053	0.016159	0.0303304
SERPINB3	ENSG00000057149	protein_coding	7.88997	1.84983	0.585284	3.16057	0.00157459	0.00378152
SOAT1	ENSG00000057252	protein_coding	1134.23	0.170637	0.120669	1.41409	0.157335	0.220048
PKP2	ENSG00000057294	protein_coding	4423.86	0.0291339	0.079749	0.36532	0.714872	0.770478
MSH4	ENSG00000057468	protein_coding	14.5956	0.165666	0.266461	0.621727	0.534121	0.60898
F7	ENSG00000057593	protein_coding	61.2304	-0.77539	0.283845	-2.73174	0.00630014	0.0130999
GDI2	ENSG00000057608	protein_coding	12549.7	-0.320509	0.0577982	-5.54532	2.93419e-08	1.76001e-07
PRDM1	ENSG00000057657	protein_coding	895.675	0.857975	0.123562	6.9437	3.81966e-12	4.6001e-11
ATG5	ENSG00000057663	protein_coding	1827.55	-0.409813	0.0619599	-6.61417	3.73652e-11	3.76172e-10
TMCC3	ENSG00000057704	protein_coding	829.858	0.323695	0.122006	2.6531	0.00797556	0.0161835
PITHD1	ENSG00000057757	protein_coding	1652.26	-0.210888	0.0581695	-3.62541	0.000288507	0.000812338
MTA3	ENSG00000057935	protein_coding	1237.53	-0.19399	0.0468669	-4.13916	3.48581e-05	0.000118404
USP13	ENSG00000058056	protein_coding	490.472	-0.0236997	0.101664	-0.233117	0.81567	0.855736
ATP11B	ENSG00000058063	protein_coding	2801.87	-0.477089	0.0820429	-5.81511	6.05945e-09	4.13562e-08
LAMC2	ENSG00000058085	protein_coding	7231.14	0.102473	0.126321	0.811217	0.417241	0.497248
CDK14	ENSG00000058091	protein_coding	292.816	0.878725	0.16953	5.18329	2.18007e-07	1.12268e-06
SEC61A1	ENSG00000058262	protein_coding	13472.6	0.0630147	0.0520867	1.2098	0.226354	0.299517
PPP1R12A	ENSG00000058272	protein_coding	2140.48	-0.137364	0.0876311	-1.56753	0.116991	0.171377
RASGRF1	ENSG00000058335	protein_coding	76.9703	-0.463711	0.221191	-2.09643	0.036044	0.0614933
CAMK2B	ENSG00000058404	protein_coding	16.2408	0.691188	0.248636	2.77992	0.00543729	0.0114911
CROCC	ENSG00000058453	protein_coding	742.512	0.269478	0.0996936	2.70307	0.0068703	0.0141615
POLR3E	ENSG00000058600	protein_coding	1899.87	-0.12724	0.061671	-2.06321	0.039093	0.0660454
ATP2B4	ENSG00000058668	protein_coding	2247.43	0.807511	0.118076	6.83891	7.97991e-12	9.06197e-11
ZC3H11A	ENSG00000058673	protein_coding	3581.51	-0.361959	0.0752182	-4.81212	1.49339e-06	6.5999e-06
RIOK2	ENSG00000058729	protein_coding	820.002	-0.362036	0.0604848	-5.98558	2.15626e-09	1.59487e-08
YIPF1	ENSG00000058799	protein_coding	987.149	-0.104531	0.0558733	-1.87087	0.0613638	0.0978029
NDC1	ENSG00000058804	protein_coding	2359.28	-0.309008	0.0760492	-4.06326	4.83912e-05	0.000160078
DGKG	ENSG00000058866	protein_coding	106.869	0.256574	0.163255	1.57162	0.116039	0.170198
FLYWCH1	ENSG00000059122	protein_coding	1115.6	0.265289	0.0831491	3.19052	0.00142016	0.00344447
UNKL	ENSG00000059145	protein_coding	416.899	0.223838	0.0846193	2.64524	0.00816341	0.0165301
TBXAS1	ENSG00000059377	protein_coding	1211.17	-0.261985	0.13255	-1.9765	0.0480984	0.0790946
PARP12	ENSG00000059378	protein_coding	1966.51	0.527612	0.0877972	6.00944	1.86163e-09	1.39458e-08
ALDH18A1	ENSG00000059573	protein_coding	5943.09	-0.120004	0.0539193	-2.22562	0.0260396	0.046261
TARBP1	ENSG00000059588	protein_coding	2001.93	-0.659199	0.0762392	-8.64646	5.31216e-18	1.55025e-16
GATB	ENSG00000059691	protein_coding	697.889	-0.105967	0.0709941	-1.49261	0.135538	0.19418
MXD1	ENSG00000059728	protein_coding	2344.29	0.273093	0.119296	2.2892	0.0220677	0.0400108
CDK17	ENSG00000059758	protein_coding	764.57	-0.16211	0.0938549	-1.72724	0.084125	0.128691
DNAJC25	ENSG00000059769	protein_coding	328.566	-0.293237	0.0569126	-5.15241	2.57157e-07	1.30753e-06
SLC2A3	ENSG00000059804	protein_coding	1234.68	0.759472	0.169067	4.49213	7.05154e-06	2.73895e-05
PSD	ENSG00000059915	protein_coding	187.02	1.64752	0.147393	11.1777	5.24164e-29	4.25336e-27
CTDP1	ENSG00000060069	protein_coding	1180.88	0.394615	0.0853102	4.62565	3.73432e-06	1.52787e-05
YBX3	ENSG00000060138	protein_coding	5627.24	0.103341	0.0635182	1.62695	0.103747	0.154715
STYK1	ENSG00000060140	protein_coding	338.144	-0.24783	0.117816	-2.10353	0.0354194	0.0605934
WNK1	ENSG00000060237	protein_coding	4769.54	0.0627179	0.0795144	0.788761	0.430251	0.51008
RPS17P5	ENSG00000060303	processed_pseudogene	2.23235	-0.86192	0.238633	-3.6119	0.000303957	0.000852163
CCAR1	ENSG00000060339	protein_coding	2508.44	-0.173571	0.0625671	-2.77415	0.00553456	0.0116713
OGFR	ENSG00000060491	protein_coding	2629.21	0.177802	0.0850408	2.09079	0.0365473	0.0622325
GNA15	ENSG00000060558	protein_coding	516.337	0.27344	0.149843	1.82484	0.0680256	0.107041
CREB3L3	ENSG00000060566	protein_coding	42.4687	0.0344316	0.247983	0.138847	0.889571	0.915532
PIGV	ENSG00000060642	protein_coding	641.364	-0.183641	0.0632874	-2.90169	0.00371152	0.0081561
PTPRU	ENSG00000060656	protein_coding	731.495	1.09017	0.206196	5.28707	1.24288e-07	6.70108e-07
SNRNP40	ENSG00000060688	protein_coding	1598.11	-0.118861	0.0658832	-1.80412	0.0712117	0.111387
RIMBP2	ENSG00000060709	protein_coding	89.8092	0.26012	0.227751	1.14212	0.253403	0.328699
COL11A1	ENSG00000060718	protein_coding	1811.53	1.41354	0.227902	6.2024	5.56082e-10	4.55482e-09
QSER1	ENSG00000060749	protein_coding	1272.16	-0.578442	0.121506	-4.76059	1.93027e-06	8.35571e-06
MPC1	ENSG00000060762	protein_coding	1204.85	-0.349597	0.0828504	-4.21962	2.4471e-05	8.57562e-05
ACAA1	ENSG00000060971	protein_coding	1917.29	-0.113279	0.0855966	-1.3234	0.185702	0.253123
BCAT1	ENSG00000060982	protein_coding	572.632	0.611539	0.20352	3.00481	0.00265751	0.00605744
HDAC7	ENSG00000061273	protein_coding	2209.96	0.47902	0.0632406	7.57455	3.60365e-14	6.11932e-13
LZTS1	ENSG00000061337	protein_coding	226.457	1.44107	0.122358	11.7775	5.10058e-32	5.09936e-30
PRDM6	ENSG00000061455	protein_coding	59.2127	1.06329	0.176917	6.0101	1.85411e-09	1.39033e-08
WNT8A	ENSG00000061492	protein_coding	0.185858	-0.524228	1.06141	-0.493896	0.621379
SPAG4	ENSG00000061656	protein_coding	227.412	-0.0576833	0.116817	-0.493792	0.621453	0.68849
NCKAP1	ENSG00000061676	protein_coding	6802.19	-0.309094	0.0594075	-5.20295	1.96152e-07	1.01803e-06
MRPS35	ENSG00000061794	protein_coding	4930.7	-0.584065	0.0835346	-6.9919	2.71197e-12	3.35747e-11
GUCY1B1	ENSG00000061918	protein_coding	363.927	1.04951	0.13277	7.90471	2.68563e-15	5.4088e-14
SFSWAP	ENSG00000061936	protein_coding	1470.85	-0.0235007	0.050355	-0.466701	0.640714	0.705359
TNK2	ENSG00000061938	protein_coding	2106.16	0.0984553	0.106184	0.927214	0.353815	0.434217
MON2	ENSG00000061987	protein_coding	1224.84	-0.53194	0.0966115	-5.50597	3.67141e-08	2.16553e-07
CDH3	ENSG00000062038	protein_coding	3734.51	-0.061104	0.118804	-0.514325	0.607025	0.675478
ARSF	ENSG00000062096	protein_coding	0.655512	-0.180069	0.330741	-0.54444	0.586139	0.656515
GPBP1	ENSG00000062194	protein_coding	2676.9	-0.285226	0.0543133	-5.2515	1.50868e-07	7.99796e-07
DGAT2	ENSG00000062282	protein_coding	1191.53	-0.14391	0.114825	-1.2533	0.210096	0.281075
ZNF112	ENSG00000062370	protein_coding	137.828	-0.483782	0.102326	-4.72786	2.26901e-06	9.67964e-06
CS	ENSG00000062485	protein_coding	7523.54	0.0277121	0.0592197	0.467955	0.639817	0.704557
LTK	ENSG00000062524	protein_coding	217.016	0.393666	0.216238	1.82053	0.0686787	0.107947
MRPS24	ENSG00000062582	protein_coding	440.768	-0.153732	0.126862	-1.21181	0.225586	0.29868
ELMO2	ENSG00000062598	protein_coding	1424.82	0.0879287	0.059696	1.47294	0.140767	0.200342
WAPL	ENSG00000062650	protein_coding	2325.59	-0.136423	0.0648009	-2.10526	0.0352683	0.0603695
VMP1	ENSG00000062716	protein_coding	7509.27	-0.683753	0.102451	-6.67396	2.48992e-11	2.57814e-10
APPBP2	ENSG00000062725	protein_coding	1189.23	-0.205196	0.0743131	-2.76124	0.00575832	0.0120992
POLD1	ENSG00000062822	protein_coding	1749.86	0.173387	0.10623	1.63219	0.102639	0.153282
SEZ6	ENSG00000063015	protein_coding	6.76601	0.0927433	0.282726	0.328033	0.742887	0.794972
EIF4B	ENSG00000063046	protein_coding	14463.5	-0.299005	0.0609738	-4.90384	9.39831e-07	4.30464e-06
SLC6A16	ENSG00000063127	protein_coding	17.0789	0.280319	0.181988	1.54032	0.123483	0.179384
BICRA	ENSG00000063169	protein_coding	627.898	0.319463	0.0897534	3.55934	0.000371781	0.00102269
SPHK2	ENSG00000063176	protein_coding	983.533	0.0783879	0.106362	0.736991	0.461128	0.539897
RPL18	ENSG00000063177	protein_coding	45265.5	-0.402286	0.104206	-3.86049	0.000113159	0.000346669
CA11	ENSG00000063180	protein_coding	113.348	0.717759	0.127111	5.64671	1.63543e-08	1.02604e-07
ISOC2	ENSG00000063241	protein_coding	2270.15	-0.0458191	0.101006	-0.453629	0.650096	0.713697
U2AF2	ENSG00000063244	protein_coding	7223.7	0.0765142	0.0639553	1.19637	0.231552	0.305062
EPN1	ENSG00000063245	protein_coding	7765.52	0.108808	0.106165	1.02489	0.305415	0.384078
MED29	ENSG00000063322	protein_coding	1828.91	0.122837	0.0574232	2.13915	0.0324236	0.0560582
AHRR	ENSG00000063438	protein_coding	67.6104	0.421552	0.159558	2.64199	0.00824196	0.0166698
GSC2	ENSG00000063515	protein_coding	0.0750257	-0.0743001	1.2379	-0.0600213	0.952139
ZNF275	ENSG00000063587	protein_coding	999.771	-0.0556587	0.0767244	-0.725436	0.468185	0.546462
MTMR1	ENSG00000063601	protein_coding	1323.85	-0.0423388	0.0596412	-0.709892	0.477771	0.555833
GPC1	ENSG00000063660	protein_coding	1557.69	0.537277	0.139013	3.86494	0.000111115	0.000341209
ADCK1	ENSG00000063761	protein_coding	491.368	-0.170592	0.0865945	-1.97001	0.048837	0.0801747
HAGH	ENSG00000063854	protein_coding	1283.58	-0.0544151	0.0922056	-0.590149	0.55509	0.628464
RNF4	ENSG00000063978	protein_coding	2307.2	0.124178	0.0431539	2.87756	0.00400763	0.0087406
CASP8	ENSG00000064012	protein_coding	1364.77	-0.136149	0.0598693	-2.2741	0.0229598	0.0414431
LIMCH1	ENSG00000064042	protein_coding	608.642	0.149366	0.144031	1.03704	0.299718	0.378051
INTS13	ENSG00000064102	protein_coding	1252.52	-0.355839	0.0698597	-5.09363	3.5128e-07	1.74204e-06
TM7SF3	ENSG00000064115	protein_coding	2436.05	-0.0844759	0.0964768	-0.875609	0.381243	0.462055
DLX3	ENSG00000064195	protein_coding	69.6094	-1.0744	0.359979	-2.98461	0.00283941	0.00642197
SPA17	ENSG00000064199	protein_coding	270.38	-0.264821	0.0886001	-2.98895	0.00279942	0.0063432
TSPAN32	ENSG00000064201	protein_coding	24.726	1.55266	0.170825	9.08922	9.97565e-20	3.52097e-18
CCN5	ENSG00000064205	protein_coding	44.3888	2.04168	0.271798	7.51174	5.83484e-14	9.50635e-13
DMRT3	ENSG00000064218	protein_coding	6.68258	-0.0543791	0.274222	-0.198303	0.842808	0.87824
ST3GAL6	ENSG00000064225	protein_coding	90.5229	0.454859	0.156168	2.91262	0.00358408	0.0079043
ATP2C2	ENSG00000064270	protein_coding	2622.52	-0.245283	0.101156	-2.4248	0.0153167	0.02892
NGFR	ENSG00000064300	protein_coding	116.121	1.87107	0.20176	9.27372	1.79768e-20	6.82956e-19
CDON	ENSG00000064309	protein_coding	169.335	0.16072	0.122592	1.31102	0.189852	0.257985
TAF2	ENSG00000064313	protein_coding	1319.18	-0.236178	0.0774375	-3.04992	0.00228906	0.0052918
HIPK2	ENSG00000064393	protein_coding	2217.77	-0.042286	0.109701	-0.385464	0.699893	0.757617
TNPO3	ENSG00000064419	protein_coding	2997.15	-0.239354	0.0460088	-5.20235	1.96788e-07	1.02108e-06
BORCS8-MEF2B	ENSG00000064489	protein_coding	15.8414	-0.0520587	0.139569	-0.372996	0.709151	0.765754
RFXANK	ENSG00000064490	protein_coding	1464.16	-0.1073	0.0874076	-1.22758	0.219606	0.291964
TMEM161A	ENSG00000064545	protein_coding	1714.03	-0.0629565	0.0977193	-0.644258	0.519408	0.595404
LPAR2	ENSG00000064547	protein_coding	876.261	0.0449411	0.102388	0.438928	0.660713	0.722973
CTSA	ENSG00000064601	protein_coding	9768.77	0.201192	0.0926125	2.1724	0.0298252	0.0521013
SUGP2	ENSG00000064607	protein_coding	1635.64	-0.0666424	0.066225	-1.0063	0.31427	0.393238
SLC12A2	ENSG00000064651	protein_coding	20345.1	-0.388288	0.116828	-3.32358	0.000888708	0.00225632
SNX24	ENSG00000064652	protein_coding	204.665	0.0653661	0.109231	0.598423	0.549558	0.623441
EYA2	ENSG00000064655	protein_coding	110.065	0.153514	0.226631	0.677376	0.498168	0.575079
CNN2	ENSG00000064666	protein_coding	7140.92	0.120944	0.0726411	1.66495	0.0959223	0.144542
ABCA7	ENSG00000064687	protein_coding	844.621	0.237571	0.116338	2.04208	0.0411436	0.0690075
SNCAIP	ENSG00000064692	protein_coding	226.898	-0.0629865	0.204897	-0.307405	0.758535	0.80815
DDX20	ENSG00000064703	protein_coding	670.486	-0.220314	0.056517	-3.89818	9.69173e-05	0.00030133
BTBD1	ENSG00000064726	protein_coding	2468.07	-0.220009	0.0634871	-3.46541	0.000529433	0.00141364
FAR2	ENSG00000064763	protein_coding	1830.28	-0.544587	0.0834733	-6.52409	6.84134e-11	6.58754e-10
BCAS1	ENSG00000064787	protein_coding	1384.1	-0.422826	0.202394	-2.08912	0.0366969	0.0624568
POU1F1	ENSG00000064835	protein_coding	1.54176	-0.680431	0.21524	-3.16126	0.00157087	0.00377345
CHI3L2	ENSG00000064886	protein_coding	56.3075	1.10824	0.21482	5.15889	2.48415e-07	1.26678e-06
SBNO2	ENSG00000064932	protein_coding	3683.95	0.614288	0.0879489	6.9846	2.85665e-12	3.51944e-11
PMS1	ENSG00000064933	protein_coding	583.556	-0.488279	0.07026	-6.94961	3.66309e-12	4.42686e-11
HMG20B	ENSG00000064961	protein_coding	2427.04	0.1023	0.0855757	1.19543	0.231919	0.305459
CALCRL	ENSG00000064989	protein_coding	477.809	0.725223	0.150485	4.81925	1.44102e-06	6.38711e-06
TAF11	ENSG00000064995	protein_coding	957.859	-0.215111	0.052866	-4.06898	4.72187e-05	0.000156621
ANKS1A	ENSG00000064999	protein_coding	1996.94	0.137754	0.0534278	2.57832	0.00992815	0.0196681
AP3D1	ENSG00000065000	protein_coding	7047.52	0.154657	0.0701195	2.20562	0.0274106	0.0483798
ZNF76	ENSG00000065029	protein_coding	1082.28	0.00627039	0.0782148	0.0801689	0.936103	0.95161
SLC9A3R2	ENSG00000065054	protein_coding	2091.1	0.292607	0.109025	2.68385	0.00727806	0.0149174
NTHL1	ENSG00000065057	protein_coding	1346.23	-0.211178	0.120809	-1.74803	0.080458	0.123802
UHRF1BP1	ENSG00000065060	protein_coding	994.717	-0.11083	0.0739764	-1.49818	0.134086	0.192346
GNAI3	ENSG00000065135	protein_coding	3826.21	-0.151861	0.0543656	-2.79333	0.00521677	0.0110705
IPO5	ENSG00000065150	protein_coding	9431.87	-0.461393	0.0749818	-6.15341	7.58356e-10	6.0712e-09
OAT	ENSG00000065154	protein_coding	3061.25	-0.0702357	0.101907	-0.689215	0.490688	0.568139
WDR3	ENSG00000065183	protein_coding	1910.11	-0.274717	0.0652423	-4.21071	2.54565e-05	8.89016e-05
PKN2	ENSG00000065243	protein_coding	2012.02	-0.320219	0.0847138	-3.78001	0.000156823	0.000466517
WDR18	ENSG00000065268	protein_coding	1971.28	0.0368125	0.115075	0.319899	0.749045	0.800271
TRAM2	ENSG00000065308	protein_coding	1832.5	0.419234	0.0810857	5.17026	2.33773e-07	1.19723e-06
NTN1	ENSG00000065320	protein_coding	198.683	1.07579	0.160783	6.69097	2.21702e-11	2.31913e-10
GLP2R	ENSG00000065325	protein_coding	28.953	0.463786	0.200714	2.31068	0.0208507	0.0380552
MCM10	ENSG00000065328	protein_coding	529.952	-0.172529	0.0903626	-1.90929	0.0562243	0.0905427
DGKA	ENSG00000065357	protein_coding	1155	0.283878	0.122616	2.31518	0.0206029	0.0376606
ERBB3	ENSG00000065361	protein_coding	12921.5	-0.203952	0.0675446	-3.01951	0.00253182	0.00580037
ROPN1	ENSG00000065371	protein_coding	1.4405	-0.832514	0.39098	-2.1293	0.0332292	0.0572734
ANKRD44	ENSG00000065413	protein_coding	320.835	0.427336	0.137718	3.10298	0.00191583	0.00451693
KARS1	ENSG00000065427	protein_coding	7428.27	-0.201176	0.0524317	-3.83691	0.000124592	0.000378174
ADAT1	ENSG00000065457	protein_coding	711.65	-0.0433991	0.0580164	-0.748049	0.45443	0.53352
PDIA5	ENSG00000065485	protein_coding	1491.56	-0.0327573	0.0625631	-0.523588	0.600565	0.669395
TBC1D22B	ENSG00000065491	protein_coding	632.297	-0.0947974	0.0480388	-1.97335	0.0484554	0.0796221
NDUFB4	ENSG00000065518	protein_coding	3081.67	-0.374577	0.0685086	-5.46759	4.56203e-08	2.64457e-07
SPEN	ENSG00000065526	protein_coding	3027.27	0.183352	0.0733466	2.4998	0.0124263	0.0239936
MYLK	ENSG00000065534	protein_coding	3882.24	0.945079	0.178289	5.30081	1.15288e-07	6.25783e-07
ZC3H15	ENSG00000065548	protein_coding	3438.56	-0.378863	0.0601131	-6.3025	2.92877e-10	2.52461e-09
MAP2K4	ENSG00000065559	protein_coding	906.822	-0.108786	0.0726525	-1.49734	0.134304	0.192626
PACC1	ENSG00000065600	protein_coding	427.333	-0.290035	0.0694562	-4.17579	2.96949e-05	0.000102271
SNAP91	ENSG00000065609	protein_coding	6.58974	1.05389	0.287713	3.663	0.000249279	0.000712103
SLK	ENSG00000065613	protein_coding	3075.81	-0.246076	0.0896368	-2.74525	0.00604643	0.0126321
CYB5R4	ENSG00000065615	protein_coding	1030.97	-0.306282	0.0877957	-3.48858	0.0004856	0.00130772
COL17A1	ENSG00000065618	protein_coding	5418.93	-0.082089	0.193466	-0.424307	0.671342	0.732421
GSTO2	ENSG00000065621	protein_coding	1004.99	-0.456696	0.13143	-3.47482	0.000511197	0.0013703
SEC61A2	ENSG00000065665	protein_coding	220.222	-0.188967	0.0865005	-2.18458	0.0289196	0.0507325
PRKCQ	ENSG00000065675	protein_coding	157.693	0.37422	0.1646	2.27351	0.0229952	0.0414945
TLE2	ENSG00000065717	protein_coding	1888.8	0.15663	0.171216	0.914807	0.360293	0.440755
ASB1	ENSG00000065802	protein_coding	901.428	-0.04411	0.0588899	-0.749026	0.453842	0.533081
FAM107B	ENSG00000065809	protein_coding	1685.72	0.0904361	0.120572	0.750059	0.453219	0.532487
ME1	ENSG00000065833	protein_coding	1126.93	-0.313682	0.131444	-2.38643	0.0170129	0.0317696
TBC1D1	ENSG00000065882	protein_coding	1964.99	0.347013	0.0727036	4.77298	1.81518e-06	7.90418e-06
CDK13	ENSG00000065883	protein_coding	2113.98	-0.277762	0.0558683	-4.97173	6.63576e-07	3.12919e-06
MTHFD2	ENSG00000065911	protein_coding	3731.33	-0.363604	0.0812299	-4.47624	7.59707e-06	2.9334e-05
SLC9A7	ENSG00000065923	protein_coding	557.519	0.243754	0.148585	1.6405	0.100901	0.151096
FOXJ2	ENSG00000065970	protein_coding	952.823	0.33691	0.0476909	7.06444	1.61262e-12	2.07358e-11
YBX1	ENSG00000065978	protein_coding	20671.2	-0.240341	0.0701859	-3.42434	0.000616288	0.0016204
PDE4A	ENSG00000065989	protein_coding	998.266	0.200709	0.0972403	2.06405	0.0390126	0.0659174
PPP2R5A	ENSG00000066027	protein_coding	2674.19	-0.385383	0.0552384	-6.97672	3.02156e-12	3.70188e-11
CTNNA2	ENSG00000066032	protein_coding	82.6568	-2.10052	0.339047	-6.19537	5.8148e-10	4.74425e-09
ELAVL1	ENSG00000066044	protein_coding	3409.24	-0.0579099	0.0433173	-1.33688	0.181262	0.247961
TIE1	ENSG00000066056	protein_coding	538.31	1.51804	0.115078	13.1914	9.83965e-40	1.82755e-37
DIP2B	ENSG00000066084	protein_coding	2400.49	-0.14706	0.0715868	-2.05429	0.0399481	0.0672929
SMARCD1	ENSG00000066117	protein_coding	2557.35	0.0620287	0.0581183	1.06728	0.285844	0.363602
KDM4A	ENSG00000066135	protein_coding	1706.61	0.0963552	0.0517614	1.86153	0.0626696	0.0996461
NFYC	ENSG00000066136	protein_coding	1607.63	0.0722033	0.0580913	1.24293	0.213894	0.285461
ZMYND12	ENSG00000066185	protein_coding	42.5512	-0.256072	0.136513	-1.87581	0.0606815	0.0968078
SLC9A3	ENSG00000066230	protein_coding	976.666	0.63191	0.248097	2.54703	0.0108645	0.0213208
NGEF	ENSG00000066248	protein_coding	974.206	-0.258421	0.10918	-2.36693	0.0179364	0.0332902
ASPM	ENSG00000066279	protein_coding	1191.25	-0.655979	0.114663	-5.72093	1.05944e-08	6.89087e-08
CD84	ENSG00000066294	protein_coding	438.314	1.15107	0.196435	5.85981	4.63403e-09	3.23624e-08
ELOVL1	ENSG00000066322	protein_coding	4200.93	-0.0465647	0.0834806	-0.55779	0.576987	0.648407
SPI1	ENSG00000066336	protein_coding	647.803	2.29446	0.11234	20.4243	1.017e-92	7.08339e-89
ZNRD1	ENSG00000066379	protein_coding	1026.72	-0.442499	0.0819086	-5.40235	6.57733e-08	3.72246e-07
MPPED2	ENSG00000066382	protein_coding	16.7811	0.377181	0.192286	1.96157	0.0498128	0.081548
CLDN18	ENSG00000066405	protein_coding	312.836	1.73581	0.416055	4.17207	3.0185e-05	0.000103835
ZBTB11	ENSG00000066422	protein_coding	903.289	-0.292537	0.0742323	-3.94083	8.1201e-05	0.000256356
ATXN3	ENSG00000066427	protein_coding	772.115	-0.370347	0.0825652	-4.48551	7.27386e-06	2.8185e-05
GOLGA5	ENSG00000066455	protein_coding	1690.26	-0.131971	0.0592337	-2.22797	0.0258823	0.0460245
FGFR2	ENSG00000066468	protein_coding	570.976	0.203244	0.184154	1.10367	0.269737	0.346308
LRRC40	ENSG00000066557	protein_coding	479.097	-0.344539	0.0856878	-4.02086	5.79849e-05	0.000189025
ISOC1	ENSG00000066583	protein_coding	1060.65	-0.0995519	0.0639064	-1.55778	0.119286	0.174251
EML1	ENSG00000066629	protein_coding	278.777	0.822484	0.137802	5.96861	2.39283e-09	1.75494e-08
TRMT11	ENSG00000066651	protein_coding	614.055	-0.425816	0.0681904	-6.2445	4.25147e-10	3.5655e-09
THUMPD1	ENSG00000066654	protein_coding	1806.89	-0.295483	0.0684918	-4.31413	1.60231e-05	5.8191e-05
MSANTD3	ENSG00000066697	protein_coding	570.488	-0.0479961	0.0677442	-0.70849	0.478641	0.556597
KIF26A	ENSG00000066735	protein_coding	344.097	0.262607	0.218216	1.20342	0.228813	0.30211
ATG2B	ENSG00000066739	protein_coding	1010.01	-0.223998	0.0865212	-2.58893	0.00962733	0.0191274
ARFGEF1	ENSG00000066777	protein_coding	3492.38	-0.35457	0.0822675	-4.30996	1.63284e-05	5.91928e-05
ACSM2B	ENSG00000066813	protein_coding	0.862312	-0.817979	0.493062	-1.65898	0.0971205	0.146163
ZFAT	ENSG00000066827	protein_coding	336.437	0.259843	0.085016	3.0564	0.00224012	0.00519302
MTFR1	ENSG00000066855	protein_coding	1564.5	-0.389957	0.0802524	-4.85913	1.17901e-06	5.30023e-06
STAG3	ENSG00000066923	protein_coding	100.505	0.211872	0.154403	1.37219	0.170003	0.23502
FECH	ENSG00000066926	protein_coding	559.12	0.451709	0.0927522	4.87006	1.11564e-06	5.03864e-06
MYO9A	ENSG00000066933	protein_coding	830.912	-0.510819	0.108816	-4.69433	2.67478e-06	1.12794e-05
DDX3Y	ENSG00000067048	protein_coding	657.773	-0.43916	0.424456	-1.03464	0.300836	0.379199
PFKP	ENSG00000067057	protein_coding	5254.28	0.313213	0.111728	2.80335	0.0050575	0.010757
IDI1	ENSG00000067064	protein_coding	2787.55	-0.444396	0.0842649	-5.2738	1.33627e-07	7.15582e-07
SP100	ENSG00000067066	protein_coding	1895.1	0.267122	0.0787361	3.39263	0.000692256	0.00180032
KLF6	ENSG00000067082	protein_coding	7319.73	0.129163	0.0914277	1.41273	0.157734	0.220517
PLPP1	ENSG00000067113	protein_coding	807.988	0.545736	0.0849446	6.42461	1.32206e-10	1.20789e-09
NEO1	ENSG00000067141	protein_coding	4044.02	0.0840875	0.0878726	0.956924	0.338605	0.418686
TRAM1	ENSG00000067167	protein_coding	7815.36	-0.115789	0.0917002	-1.26269	0.206699	0.277293
PHKA1	ENSG00000067177	protein_coding	703.782	-0.408556	0.119793	-3.41051	0.000648421	0.00169581
TNFRSF1A	ENSG00000067182	protein_coding	4031.41	0.319701	0.0661512	4.83288	1.34573e-06	5.99679e-06
CACNB1	ENSG00000067191	protein_coding	212.746	0.0161088	0.103105	0.156237	0.875846	0.904615
EVI5	ENSG00000067208	protein_coding	763.27	-0.44699	0.097066	-4.60501	4.12442e-06	1.67258e-05
STOML1	ENSG00000067221	protein_coding	527.098	-0.0104851	0.0825098	-0.127077	0.898879	0.92268
PKM	ENSG00000067225	protein_coding	46762.8	0.356877	0.0989919	3.60512	0.000312012	0.000872464
DHX29	ENSG00000067248	protein_coding	1145.41	-0.140261	0.057491	-2.4397	0.0146996	0.0278745
DNTTIP2	ENSG00000067334	protein_coding	1970.95	-0.291333	0.0587634	-4.95773	7.13224e-07	3.34181e-06
METTL22	ENSG00000067365	protein_coding	454.026	-0.163526	0.0726039	-2.2523	0.0243031	0.0435424
TP53BP1	ENSG00000067369	protein_coding	1411.76	-0.0995488	0.0826403	-1.2046	0.228356	0.30165
TRO	ENSG00000067445	protein_coding	103.145	1.29049	0.130379	9.89796	4.24839e-23	2.07407e-21
RRP15	ENSG00000067533	protein_coding	930.478	-0.640035	0.0749917	-8.53474	1.40467e-17	3.84926e-16
RHOA	ENSG00000067560	protein_coding	18993.8	0.0411394	0.0527116	0.780462	0.435119	0.514854
DHX8	ENSG00000067596	protein_coding	2304.42	0.0100282	0.0470398	0.213185	0.831182	0.86869
PMS2P4	ENSG00000067601	transcribed_unprocessed_pseudogene	34.0231	-0.279621	0.0759707	-3.68064	0.000232648	0.000668986
PRKCZ	ENSG00000067606	protein_coding	1085.93	-0.0601296	0.0866868	-0.693641	0.487907	0.565468
ZFY	ENSG00000067646	protein_coding	198.115	-0.773757	0.444604	-1.74033	0.0818015	0.125613
IARS2	ENSG00000067704	protein_coding	5270.05	-0.234854	0.0532052	-4.41412	1.01421e-05	3.81945e-05
SYT1	ENSG00000067715	protein_coding	211.362	-0.618852	0.210537	-2.9394	0.00328848	0.00732584
NAV3	ENSG00000067798	protein_coding	58.5918	0.535761	0.220042	2.43482	0.0148993	0.028207
IDH3G	ENSG00000067829	protein_coding	3577.78	0.098924	0.11964	0.826846	0.408324	0.48832
ROGDI	ENSG00000067836	protein_coding	743.131	0.193759	0.0953173	2.03278	0.0420751	0.0704003
PDZD4	ENSG00000067840	protein_coding	45.6936	1.49404	0.183688	8.13358	4.16811e-16	9.51832e-15
ATP2B3	ENSG00000067842	protein_coding	1.8605	0.865934	0.304016	2.84832	0.00439513	0.00948378
ROCK1	ENSG00000067900	protein_coding	1534.28	0.0853089	0.0999093	0.853864	0.393181	0.473612
CBFB	ENSG00000067955	protein_coding	2457.5	-0.292841	0.0673894	-4.34551	1.38955e-05	5.10859e-05
PDK3	ENSG00000067992	protein_coding	579.226	-0.363696	0.093834	-3.87595	0.000106207	0.000327413
HYAL2	ENSG00000068001	protein_coding	2329.66	0.235871	0.100557	2.34565	0.0189938	0.0350519
HDAC4	ENSG00000068024	protein_coding	897.295	-0.0360402	0.0691182	-0.521429	0.602068	0.670748
RASSF1	ENSG00000068028	protein_coding	1187.16	0.249746	0.076663	3.25772	0.00112313	0.00278947
FGFR3	ENSG00000068078	protein_coding	1311	-0.486833	0.166827	-2.9182	0.00352062	0.00778612
IFI35	ENSG00000068079	protein_coding	1530.13	0.461019	0.102213	4.51037	6.47145e-06	2.53484e-05
HEATR6	ENSG00000068097	protein_coding	490.774	0.0341381	0.0607161	0.562258	0.57394	0.645868
COASY	ENSG00000068120	protein_coding	3582.08	-0.0849744	0.0809853	-1.04926	0.29406	0.372295
PLEKHH3	ENSG00000068137	protein_coding	683.131	0.189367	0.0934074	2.02733	0.0426292	0.0711991
MEF2A	ENSG00000068305	protein_coding	1036.75	0.11751	0.0766136	1.5338	0.125079	0.181407
OTUD5	ENSG00000068308	protein_coding	2690.45	0.103911	0.0699051	1.48646	0.137157	0.196173
TFE3	ENSG00000068323	protein_coding	1817.19	0.37843	0.0637778	5.93357	2.96425e-09	2.13985e-08
TBC1D25	ENSG00000068354	protein_coding	644.33	0.184089	0.0719282	2.55934	0.010487	0.0206566
ACSL4	ENSG00000068366	protein_coding	2385.26	-0.0363219	0.116823	-0.310913	0.755867	0.805993
INPP5A	ENSG00000068383	protein_coding	1003.52	-0.00294449	0.0561441	-0.0524453	0.958174	0.968416
GPKOW	ENSG00000068394	protein_coding	1098.83	-0.0623333	0.0789147	-0.789882	0.429597	0.509532
GRIPAP1	ENSG00000068400	protein_coding	1876.71	-0.0225741	0.0703896	-0.320702	0.748436	0.799804
FTSJ1	ENSG00000068438	protein_coding	1778.22	-0.103412	0.0691528	-1.49542	0.134806	0.193214
PRR11	ENSG00000068489	protein_coding	943.97	-0.293744	0.0793136	-3.70358	0.000212579	0.000616407
REEP1	ENSG00000068615	protein_coding	270.29	-0.752745	0.22375	-3.36423	0.000767571	0.00197822
ATP11A	ENSG00000068650	protein_coding	3494.58	-0.20846	0.107133	-1.94581	0.051677	0.0841844
POLR1A	ENSG00000068654	protein_coding	3137.57	-0.00530442	0.0622226	-0.0852491	0.932063	0.948542
LAPTM4A	ENSG00000068697	protein_coding	8824.11	-0.0153958	0.0575254	-0.267634	0.788981	0.833524
TTC7A	ENSG00000068724	protein_coding	1387.37	0.401182	0.0773178	5.18873	2.1173e-07	1.09291e-06
IP6K2	ENSG00000068745	protein_coding	2746.56	-0.120915	0.066485	-1.81868	0.068961	0.108323
STON1-GTF2A1L	ENSG00000068781	protein_coding	2.16441	0.656702	0.339521	1.9342	0.0530886	0.0861548
SRBD1	ENSG00000068784	protein_coding	643.287	-0.156988	0.0719123	-2.18305	0.029032	0.0509126
KIF2A	ENSG00000068796	protein_coding	1217.55	-0.0799599	0.0774617	-1.03225	0.301955	0.380447
RASGRP2	ENSG00000068831	protein_coding	137.121	1.84147	0.131469	14.0068	1.41579e-44	3.74466e-42
PSME4	ENSG00000068878	protein_coding	2886.89	-0.304251	0.0584875	-5.20198	1.97175e-07	1.02296e-06
IFT80	ENSG00000068885	protein_coding	323.584	-0.559564	0.0896855	-6.23918	4.39862e-10	3.67637e-09
SIRT2	ENSG00000068903	protein_coding	1510.4	0.0927044	0.0664828	1.39441	0.163193	0.227162
ERLEC1	ENSG00000068912	protein_coding	2603.02	-0.265446	0.0593663	-4.47133	7.77339e-06	2.99346e-05
PPP2R5B	ENSG00000068971	protein_coding	748.741	0.439388	0.0766184	5.73476	9.76525e-09	6.39339e-08
PYGM	ENSG00000068976	protein_coding	39.1496	1.75673	0.170766	10.2874	8.03427e-25	4.63746e-23
PAGE1	ENSG00000068985	protein_coding	2.5202	1.10532	0.834786	1.32407	0.185479	0.252852
PITX1	ENSG00000069011	protein_coding	1792.24	0.13404	0.136291	0.983483	0.32537	0.404739
TRPC7	ENSG00000069018	protein_coding	3.69565	-0.405381	0.256679	-1.57933	0.114261	0.167937
MAST4	ENSG00000069020	protein_coding	651.279	0.170732	0.103426	1.65077	0.0987862	0.14827
ADGRF5	ENSG00000069122	protein_coding	645.921	0.841494	0.130297	6.45827	1.0591e-10	9.84644e-10
SDK2	ENSG00000069188	protein_coding	114.726	-0.047477	0.204413	-0.23226	0.816336	0.856314
ADAM7	ENSG00000069206	protein_coding	0.285383	-1.03118	1.00515	-1.02589	0.304943	0.383611
NUP133	ENSG00000069248	protein_coding	1924.25	-0.246119	0.052394	-4.69746	2.63415e-06	1.11182e-05
NUCKS1	ENSG00000069275	protein_coding	8822.65	-0.320181	0.0743327	-4.3074	1.65182e-05	5.98178e-05
VPS35	ENSG00000069329	protein_coding	5832.99	-0.210008	0.0585034	-3.58967	0.000331101	0.000920728
DNAJA2	ENSG00000069345	protein_coding	3073.34	-0.219523	0.0478984	-4.58309	4.58161e-06	1.84438e-05
BCL3	ENSG00000069399	protein_coding	2522.42	0.541775	0.113133	4.78881	1.67769e-06	7.34914e-06
KCNAB2	ENSG00000069424	protein_coding	1172.92	0.421263	0.110945	3.79704	0.000146434	0.000438546
ABCC9	ENSG00000069431	protein_coding	167.433	0.589061	0.20064	2.93591	0.00332574	0.00739701
GAL	ENSG00000069482	protein_coding	355.282	-0.427443	0.250547	-1.70604	0.0880014	0.133974
CLEC2D	ENSG00000069493	protein_coding	184.563	0.48658	0.153628	3.16727	0.00153878	0.00370414
FUNDC1	ENSG00000069509	protein_coding	519.069	-0.460674	0.0778537	-5.91717	3.27527e-09	2.3475e-08
MAOB	ENSG00000069535	protein_coding	354.28	0.455312	0.221136	2.05897	0.039497	0.0666282
RORA	ENSG00000069667	protein_coding	314.26	0.0263248	0.17728	0.148493	0.881954	0.909529
DRD4	ENSG00000069696	protein_coding	35.204	-0.00779904	0.167932	-0.0464417	0.962958	0.972108
TGFBR3	ENSG00000069702	protein_coding	764.705	-0.0656156	0.144237	-0.454914	0.649171	0.712886
PLA2G10	ENSG00000069764	protein_coding	110.102	-0.153311	0.18371	-0.834528	0.403983	0.484043
HES2	ENSG00000069812	protein_coding	591.283	-0.178918	0.169173	-1.05761	0.290235	0.36828
ATP1B3	ENSG00000069849	protein_coding	6237.19	-0.244931	0.0684561	-3.57793	0.000346332	0.00095849
NEDD4	ENSG00000069869	protein_coding	754.891	-0.401524	0.106003	-3.78784	0.000151961	0.000453508
PIGB	ENSG00000069943	protein_coding	291.353	-0.223059	0.0694942	-3.20975	0.00132852	0.00324374
MAPK6	ENSG00000069956	protein_coding	1993.98	-0.292217	0.0815346	-3.58396	0.000338422	0.000938777
GNB5	ENSG00000069966	protein_coding	448.293	0.612111	0.0981496	6.23651	4.47444e-10	3.73227e-09
RAB27A	ENSG00000069974	protein_coding	894.289	0.268009	0.0937574	2.85854	0.00425596	0.00921442
HDHD5	ENSG00000069998	protein_coding	2300.61	-0.0113968	0.0890265	-0.128015	0.898137	0.922256
UFD1	ENSG00000070010	protein_coding	2111.05	-0.0743294	0.0592049	-1.25546	0.209312	0.28025
LRP6	ENSG00000070018	protein_coding	1551.58	-0.415946	0.0877407	-4.74063	2.1306e-06	9.1405e-06
GUCY2C	ENSG00000070019	protein_coding	3082.74	-0.596571	0.126837	-4.70344	2.55819e-06	1.0815e-05
SCT	ENSG00000070031	protein_coding	23.4395	-0.243559	0.23891	-1.01946	0.307986	0.386722
PHRF1	ENSG00000070047	protein_coding	2185.57	0.148868	0.0713596	2.08617	0.0369632	0.062846
ELP1	ENSG00000070061	protein_coding	1567.01	-0.169179	0.0477697	-3.54156	0.000397776	0.00108818
NUCB2	ENSG00000070081	protein_coding	1398.6	0.0081082	0.0981277	0.082629	0.934147	0.950037
PFN2	ENSG00000070087	protein_coding	1664.41	-0.630754	0.166531	-3.7876	0.000152107	0.000453879
PTPN3	ENSG00000070159	protein_coding	2333.42	-0.52422	0.0663759	-7.89776	2.83965e-15	5.69429e-14
SPTB	ENSG00000070182	protein_coding	55.3335	0.384925	0.170956	2.25161	0.0243471	0.0436137
DAPP1	ENSG00000070190	protein_coding	280.619	0.510791	0.167259	3.05389	0.00225894	0.00523055
FGF10	ENSG00000070193	protein_coding	25.3529	1.53118	0.218099	7.02059	2.20937e-12	2.7785e-11
SLC44A1	ENSG00000070214	protein_coding	7220.4	-0.399169	0.0573864	-6.95581	3.50533e-12	4.24726e-11
TMEM260	ENSG00000070269	protein_coding	880.279	-0.497523	0.0715266	-6.95577	3.5064e-12	4.24732e-11
SMG6	ENSG00000070366	protein_coding	646.094	0.4987	0.077177	6.46177	1.03488e-10	9.64062e-10
EXOC5	ENSG00000070367	protein_coding	1693.23	-0.300806	0.0949683	-3.16744	0.00153787	0.00370247
CLTCL1	ENSG00000070371	protein_coding	186.74	0.263703	0.130274	2.02421	0.0429482	0.0716633
FGF22	ENSG00000070388	protein_coding	1.78064	0.410186	0.232396	1.76503	0.077558	0.11998
FSTL3	ENSG00000070404	protein_coding	985.417	1.16725	0.150152	7.77376	7.61926e-15	1.43298e-13
DGCR2	ENSG00000070413	protein_coding	4954.83	0.131929	0.0737925	1.78784	0.0738025	0.114859
RNF126	ENSG00000070423	protein_coding	2080.16	0.0885094	0.105358	0.840083	0.400862	0.480967
MNT	ENSG00000070444	protein_coding	994.243	0.407424	0.0734459	5.54727	2.90161e-08	1.74247e-07
ZXDC	ENSG00000070476	protein_coding	1115.93	-0.204713	0.0561368	-3.64669	0.000265642	0.000754004
JMJD6	ENSG00000070495	protein_coding	1083.26	0.0552262	0.0624257	0.884672	0.376334	0.456981
POLB	ENSG00000070501	protein_coding	726.672	-0.319075	0.0858486	-3.71672	0.000201827	0.000588375
ST6GALNAC1	ENSG00000070526	protein_coding	4216.21	-0.525522	0.186102	-2.82384	0.00474526	0.0101611
WIPI1	ENSG00000070540	protein_coding	1119.95	-0.0372387	0.0979535	-0.380167	0.703821	0.760863
FRMPD1	ENSG00000070601	protein_coding	21.9619	0.802724	0.238385	3.36735	0.000758947	0.0019578
GBA2	ENSG00000070610	protein_coding	2821.36	0.00431839	0.0741275	0.0582562	0.953545	0.964905
NDST1	ENSG00000070614	protein_coding	2213.72	0.589212	0.0730758	8.06303	7.44289e-16	1.62762e-14
ASNS	ENSG00000070669	protein_coding	2355.48	-0.717936	0.105258	-6.82076	9.05632e-12	1.01683e-10
AP3M2	ENSG00000070718	protein_coding	764.598	0.00201575	0.0797677	0.0252703	0.979839	0.984622
CNGB1	ENSG00000070729	protein_coding	3.64768	0.130278	0.233471	0.558006	0.57684	0.648311
ST6GALNAC2	ENSG00000070731	protein_coding	222.819	-0.0141116	0.174704	-0.0807739	0.935622	0.951224
CHAT	ENSG00000070748	protein_coding	1.07002	0.57884	0.448467	1.29071	0.196805	0.265907
PABPC1	ENSG00000070756	protein_coding	71023	-0.290402	0.0800292	-3.6287	0.000284857	0.000803033
TESK2	ENSG00000070759	protein_coding	251.786	0.146553	0.0724461	2.02292	0.0430812	0.0718593
CFAP20	ENSG00000070761	protein_coding	1166.31	-0.170401	0.0627379	-2.71608	0.00660597	0.0136726
CSNK2A2	ENSG00000070770	protein_coding	3020.6	-0.391086	0.0479337	-8.15889	3.38104e-16	7.81058e-15
PTPN21	ENSG00000070778	protein_coding	550.619	0.241052	0.0772027	3.12232	0.00179431	0.00425539
EIF2B3	ENSG00000070785	protein_coding	819.701	-0.359823	0.0644147	-5.58604	2.32304e-08	1.41645e-07
CAMK2A	ENSG00000070808	protein_coding	14.4621	0.171522	0.19063	0.899764	0.368246	0.448894
TCOF1	ENSG00000070814	protein_coding	3507.87	-0.0913201	0.0808502	-1.1295	0.258688	0.334444
CDC42	ENSG00000070831	protein_coding	7624.09	-0.208366	0.0675842	-3.08305	0.00204888	0.00479624
OSBPL3	ENSG00000070882	protein_coding	1609.54	-0.304894	0.0765403	-3.98344	6.79252e-05	0.000218135
EPHA8	ENSG00000070886	protein_coding	6.41788	0.267172	0.429483	0.622077	0.533891	0.608801
SLC12A3	ENSG00000070915	protein_coding	5.2261	1.35031	0.230332	5.86245	4.56075e-09	3.18826e-08
RAD18	ENSG00000070950	protein_coding	958.173	-0.425566	0.0670088	-6.35089	2.14075e-10	1.88659e-09
ATP2B1	ENSG00000070961	protein_coding	2151.45	-0.221901	0.0859889	-2.58058	0.00986338	0.0195481
TRPM5	ENSG00000070985	protein_coding	99.2104	-0.226929	0.214348	-1.05869	0.28974	0.36774
NCK2	ENSG00000071051	protein_coding	2469.51	-0.121032	0.0768846	-1.5742	0.115441	0.169395
MAP4K4	ENSG00000071054	protein_coding	3396.56	0.258693	0.084014	3.07917	0.00207579	0.00485191
MGAT4A	ENSG00000071073	protein_coding	2213.83	-0.242859	0.0976205	-2.48779	0.012854	0.0247054
RPL31	ENSG00000071082	protein_coding	30454.4	-0.626224	0.0733117	-8.54193	1.31993e-17	3.65055e-16
WDR1	ENSG00000071127	protein_coding	15260.4	0.131249	0.0675784	1.94218	0.0521159	0.0848266
SNX13	ENSG00000071189	protein_coding	1828.7	-0.663792	0.0965182	-6.87737	6.09671e-12	7.06353e-11
MS4A12	ENSG00000071203	protein_coding	277.35	0.972265	0.366018	2.65633	0.00789959	0.0160449
ARHGAP10	ENSG00000071205	protein_coding	320.23	0.5262	0.146658	3.58794	0.000333304	0.000925992
RPS6KA2	ENSG00000071242	protein_coding	980.771	0.436221	0.103612	4.21015	2.55203e-05	8.90972e-05
ING3	ENSG00000071243	protein_coding	456.535	-0.240561	0.0599377	-4.01352	5.98207e-05	0.00019447
VASH1	ENSG00000071246	protein_coding	548.08	1.42434	0.0996744	14.2899	2.52932e-46	7.34028e-44
LMCD1	ENSG00000071282	protein_coding	766.888	0.593062	0.116014	5.11198	3.18799e-07	1.5938e-06
BUD23	ENSG00000071462	protein_coding	3920.17	-0.346122	0.0688381	-5.02806	4.95475e-07	2.39319e-06
SEL1L	ENSG00000071537	protein_coding	3859.08	0.0300931	0.0809965	0.371536	0.710238	0.766788
TRIP13	ENSG00000071539	protein_coding	1026.3	-0.277019	0.0831431	-3.33184	0.000862739	0.00219733
ATP6AP1	ENSG00000071553	protein_coding	6467.32	0.094674	0.0712093	1.32952	0.183677	0.250807
TCF3	ENSG00000071564	protein_coding	4669.77	0.120121	0.0818485	1.4676	0.142212	0.202123
TRIB2	ENSG00000071575	protein_coding	979.926	1.15424	0.14715	7.844	4.36405e-15	8.4904e-14
DAZAP1	ENSG00000071626	protein_coding	4941.71	-0.0551254	0.0617354	-0.892931	0.371894	0.452589
MBD3	ENSG00000071655	protein_coding	2301.1	0.13988	0.0975888	1.43337	0.151753	0.213481
PRLH	ENSG00000071677	protein_coding	0.089553	0.0713807	1.17498	0.0607507	0.951558
HLTF	ENSG00000071794	protein_coding	931.053	-0.565302	0.146456	-3.85986	0.000113451	0.000347387
FAM50A	ENSG00000071859	protein_coding	2590.74	-0.0761185	0.101642	-0.748884	0.453927	0.533139
FAM3A	ENSG00000071889	protein_coding	2311.43	-0.127775	0.104702	-1.22036	0.222327	0.294926
CPSF1	ENSG00000071894	protein_coding	5586.67	0.120992	0.110164	1.09829	0.272076	0.348807
MYO3B	ENSG00000071909	protein_coding	19.6864	-0.516835	0.192244	-2.68843	0.00717892	0.014738
CYBRD1	ENSG00000071967	protein_coding	1601.26	0.874847	0.152147	5.75	8.92436e-09	5.89084e-08
CDH19	ENSG00000071991	protein_coding	20.3929	1.19177	0.32522	3.66449	0.000247835	0.000708222
PDCD2	ENSG00000071994	protein_coding	2425.64	-0.419172	0.0582167	-7.2002	6.01249e-13	8.28292e-12
SLC6A15	ENSG00000072041	protein_coding	5.21264	0.521552	0.361789	1.44159	0.149418	0.210724
RDH11	ENSG00000072042	protein_coding	2410.45	-0.131012	0.0790082	-1.65821	0.0972751	0.146359
PRKACA	ENSG00000072062	protein_coding	2052.23	0.266197	0.0708198	3.7588	0.000170729	0.000504546
ADGRL1	ENSG00000072071	protein_coding	1738.58	0.209257	0.0963768	2.17124	0.0299128	0.0522315
SPP2	ENSG00000072080	protein_coding	0.280603	-0.464649	0.675714	-0.687642	0.491678	0.568971
ACTN1	ENSG00000072110	protein_coding	11012.1	0.440662	0.0752885	5.85298	4.82856e-09	3.36365e-08
ZFYVE26	ENSG00000072121	protein_coding	1004.01	0.315112	0.0710527	4.43491	9.2112e-06	3.49815e-05
RPS6KA6	ENSG00000072133	protein_coding	251.066	-0.926337	0.217715	-4.25482	2.09216e-05	7.42581e-05
EPN2	ENSG00000072134	protein_coding	749.157	0.281524	0.0704591	3.99557	6.454e-05	0.000208369
PTPN18	ENSG00000072135	protein_coding	3008.84	0.0713407	0.07543	0.945787	0.344257	0.424518
LIMS2	ENSG00000072163	protein_coding	738.097	1.12856	0.167455	6.73947	1.58968e-11	1.71042e-10
ASIC4	ENSG00000072182	protein_coding	6.35651	-0.271623	0.245078	-1.10831	0.267728	0.344267
SPEG	ENSG00000072195	protein_coding	236.746	0.906238	0.213402	4.24662	2.17021e-05	7.67609e-05
LNX1	ENSG00000072201	protein_coding	593.876	-0.348659	0.0885635	-3.93682	8.25683e-05	0.000260221
ALDH3A2	ENSG00000072210	protein_coding	2774.24	-0.14261	0.0775309	-1.83939	0.0658577	0.104072
TFRC	ENSG00000072274	protein_coding	16397.5	-0.354247	0.110944	-3.19303	0.00140787	0.00341904
SREBF1	ENSG00000072310	protein_coding	5078.35	0.601421	0.114618	5.2472	1.54431e-07	8.17336e-07
TRPC5	ENSG00000072315	protein_coding	1.64603	-1.74633	0.521495	-3.3487	0.00081193	0.00208112
AFF4	ENSG00000072364	protein_coding	2860.17	-0.278882	0.094568	-2.949	0.003188	0.00712517
UBE2D1	ENSG00000072401	protein_coding	956.626	-0.170901	0.0736924	-2.31912	0.0203886	0.0373074
MPP5	ENSG00000072415	protein_coding	1187.7	-0.313246	0.0727161	-4.3078	1.64889e-05	5.97217e-05
RHOBTB1	ENSG00000072422	protein_coding	604.351	0.0215671	0.106403	0.202692	0.839376	0.875275
SMC1A	ENSG00000072501	protein_coding	5747.49	0.139412	0.0727226	1.91704	0.0552324	0.0891319
HSD17B10	ENSG00000072506	protein_coding	3893.77	-0.279009	0.103983	-2.68322	0.00729174	0.0149417
MARK2	ENSG00000072518	protein_coding	3095.09	0.119012	0.0656215	1.81361	0.0697372	0.109372
HMMR	ENSG00000072571	protein_coding	1121.21	-0.540985	0.112098	-4.82602	1.39288e-06	6.19434e-06
CHFR	ENSG00000072609	protein_coding	810.439	0.187397	0.120525	1.55485	0.119983	0.175054
TRHDE	ENSG00000072657	protein_coding	65.8746	-0.723334	0.216837	-3.33584	0.000850417	0.00217018
P4HA2	ENSG00000072682	protein_coding	2381.57	0.0516965	0.076798	0.673149	0.500852	0.577683
FCGR2B	ENSG00000072694	protein_coding	164.664	1.67226	0.198286	8.43359	3.35217e-17	8.82162e-16
NFATC3	ENSG00000072736	protein_coding	831.863	0.0296366	0.0749568	0.395383	0.69256	0.751216
TRNT1	ENSG00000072756	protein_coding	700.013	-0.428962	0.0691204	-6.20601	5.43468e-10	4.46287e-09
ACADVL	ENSG00000072778	protein_coding	9253.01	0.0315281	0.0876833	0.359568	0.71917	0.774192
STK10	ENSG00000072786	protein_coding	1540.15	0.547358	0.0629145	8.70003	3.31807e-18	9.99727e-17
FBXW11	ENSG00000072803	protein_coding	1493.95	-0.0868317	0.0526808	-1.64826	0.0992996	0.148949
ACAP1	ENSG00000072818	protein_coding	341.727	1.63801	0.117905	13.8926	7.02288e-44	1.74694e-41
CRMP1	ENSG00000072832	protein_coding	203.837	1.38198	0.126618	10.9146	9.8203e-28	7.09313e-26
EVC	ENSG00000072840	protein_coding	278.174	1.82503	0.158081	11.5449	7.83672e-31	7.21358e-29
DERL2	ENSG00000072849	protein_coding	972.878	-0.0550217	0.0676099	-0.81381	0.415754	0.495773
SIDT1	ENSG00000072858	protein_coding	516.954	-0.062478	0.152614	-0.409385	0.682257	0.741976
NDE1	ENSG00000072864	protein_coding	1405.72	-0.00215109	0.0532206	-0.0404184	0.96776	0.975745
IRAG1	ENSG00000072952	protein_coding	798.484	1.17158	0.135583	8.64103	5.57066e-18	1.62003e-16
TMEM38A	ENSG00000072954	protein_coding	243.929	-0.179096	0.137946	-1.2983	0.194184	0.26285
AP1M1	ENSG00000072958	protein_coding	1369.43	0.393424	0.0777066	5.06295	4.12829e-07	2.02252e-06
PVR	ENSG00000073008	protein_coding	2639.75	-0.2398	0.0669609	-3.58119	0.000342031	0.000947781
XRCC1	ENSG00000073050	protein_coding	1354.08	-0.00995631	0.0732001	-0.136015	0.891809	0.917384
SCARB1	ENSG00000073060	protein_coding	4222.36	0.0946801	0.101875	0.929375	0.352695	0.433032
CYP2W1	ENSG00000073067	protein_coding	2017.14	-0.293735	0.308847	-0.95107	0.341569	0.421773
MCM2	ENSG00000073111	protein_coding	3623.71	0.161846	0.0974127	1.66144	0.0966242	0.145526
MOV10L1	ENSG00000073146	protein_coding	17.5936	0.486509	0.176158	2.76178	0.00574875	0.0120827
PANX2	ENSG00000073150	protein_coding	24.2405	1.28485	0.218649	5.87631	4.19521e-09	2.95048e-08
SELENOO	ENSG00000073169	protein_coding	967.572	0.131704	0.101025	1.30368	0.192341	0.260826
TP63	ENSG00000073282	protein_coding	15.4081	0.454631	0.217133	2.0938	0.0362781	0.0618513
ALPK1	ENSG00000073331	protein_coding	736.044	-0.222929	0.0800303	-2.78555	0.00534362	0.0113114
LLGL2	ENSG00000073350	protein_coding	10103.3	-0.194575	0.103518	-1.87962	0.0601594	0.0960849
PDE8A	ENSG00000073417	protein_coding	1343.64	-0.264878	0.0681795	-3.88501	0.000102324	0.000316773
CLCN4	ENSG00000073464	protein_coding	385.457	-0.178117	0.165119	-1.07872	0.280714	0.358047
NLE1	ENSG00000073536	protein_coding	1362.18	-0.145783	0.0857922	-1.69926	0.0892708	0.135694
SDHA	ENSG00000073578	protein_coding	6106.55	0.207613	0.0949333	2.18694	0.028747	0.050472
SMARCE1	ENSG00000073584	protein_coding	2258.42	-0.369169	0.07374	-5.00636	5.54703e-07	2.65351e-06
FNDC8	ENSG00000073598	protein_coding	2.47247	0.236424	0.178693	1.32307	0.185811	0.253246
GSDMB	ENSG00000073605	protein_coding	2414.63	-0.235203	0.129473	-1.81662	0.0692753	0.108749
KDM5A	ENSG00000073614	protein_coding	2061.6	-0.21741	0.0816134	-2.6639	0.00772407	0.0157328
ADAM11	ENSG00000073670	protein_coding	18.4448	0.626061	0.18889	3.31442	0.000918329	0.00232489
PPP2R3A	ENSG00000073711	protein_coding	275.867	-0.233633	0.129259	-1.80747	0.0706883	0.110705
FERMT2	ENSG00000073712	protein_coding	801.942	1.02062	0.149061	6.84701	7.54077e-12	8.60772e-11
ABCB11	ENSG00000073734	protein_coding	7.13628	-0.0529615	0.279399	-0.189555	0.849658	0.884023
DHRS9	ENSG00000073737	protein_coding	542.479	0.109287	0.251087	0.435257	0.663376	0.725264
CD5L	ENSG00000073754	protein_coding	1.02796	0.00374689	0.403982	0.00927488	0.9926	0.994241
PTGS2	ENSG00000073756	protein_coding	603.069	0.155673	0.22571	0.689704	0.49038	0.567893
IGF2BP2	ENSG00000073792	protein_coding	2128.48	-0.315159	0.0875675	-3.59904	0.000319392	0.000891075
MAP3K13	ENSG00000073803	protein_coding	1335.13	-0.280264	0.0587809	-4.76794	1.86117e-06	8.08925e-06
ST6GAL1	ENSG00000073849	protein_coding	4828.79	-0.0981933	0.138873	-0.707073	0.479521	0.557449
TBX21	ENSG00000073861	protein_coding	28.5988	2.2903	0.16887	13.5625	6.68507e-42	1.45505e-39
VDAC1P1	ENSG00000073905	processed_pseudogene	17.3895	-0.321199	0.152232	-2.10993	0.0348641	0.0597487
FRY	ENSG00000073910	protein_coding	554.692	0.329173	0.139064	2.36706	0.0179299	0.0332796
PICALM	ENSG00000073921	protein_coding	5348.56	-0.018093	0.0640191	-0.282619	0.777469	0.82371
NSF	ENSG00000073969	protein_coding	1897.28	-0.118917	0.0458203	-2.5953	0.00945087	0.0188028
GLI2	ENSG00000074047	protein_coding	164.038	1.77088	0.135078	13.1101	2.88201e-39	5.12876e-37
CLASP1	ENSG00000074054	protein_coding	1630.79	0.000995789	0.058535	0.0170119	0.986427	0.989553
MRPS34	ENSG00000074071	protein_coding	3846.41	-0.0839967	0.119747	-0.701451	0.483021	0.560816
NOTCH3	ENSG00000074181	protein_coding	3067.97	1.44744	0.116587	12.4151	2.16301e-35	2.74749e-33
CLNS1A	ENSG00000074201	protein_coding	3510.4	-0.362141	0.0552935	-6.54944	5.77521e-11	5.62316e-10
PPP2R2C	ENSG00000074211	protein_coding	199.493	-1.08883	0.266502	-4.08565	4.3954e-05	0.000146689
TEAD2	ENSG00000074219	protein_coding	1016.02	0.0425736	0.121737	0.349717	0.726551	0.780689
EED	ENSG00000074266	protein_coding	797.997	-0.159422	0.0518747	-3.07321	0.00211769	0.00494101
CDHR2	ENSG00000074276	protein_coding	1619.85	-0.205633	0.204016	-1.00793	0.31349	0.392485
SNCB	ENSG00000074317	protein_coding	1.90785	0.588554	0.287253	2.04891	0.0404712	0.06803
TSG101	ENSG00000074319	protein_coding	2569.97	-0.143366	0.0538785	-2.66091	0.00779295	0.0158532
NCBP3	ENSG00000074356	protein_coding	1518.12	0.046521	0.0660893	0.70391	0.481489	0.55941
ATP2A3	ENSG00000074370	protein_coding	4538.55	0.145911	0.169356	0.861565	0.388927	0.469571
CA12	ENSG00000074410	protein_coding	4324.77	-0.281304	0.164189	-1.71329	0.0866586	0.132172
MGLL	ENSG00000074416	protein_coding	5598.52	-0.141473	0.105498	-1.341	0.17992	0.246463
NTN4	ENSG00000074527	protein_coding	584.047	-0.0475759	0.119083	-0.399518	0.689512	0.748511
BCS1L	ENSG00000074582	protein_coding	1092.32	-0.280716	0.0736118	-3.81347	0.00013703	0.000412751
NUAK1	ENSG00000074590	protein_coding	473.88	1.01311	0.129629	7.81547	5.47593e-15	1.0531e-13
DPP8	ENSG00000074603	protein_coding	1265.8	-0.215989	0.0796444	-2.71191	0.0066896	0.0138224
SLC24A1	ENSG00000074621	protein_coding	400.124	-0.0244816	0.0824361	-0.296977	0.766484	0.814633
ZNF532	ENSG00000074657	protein_coding	797.227	0.856913	0.122139	7.01587	2.28529e-12	2.86794e-11
SCARF1	ENSG00000074660	protein_coding	296.595	1.1006	0.11802	9.32556	1.10404e-20	4.26806e-19
LMAN1	ENSG00000074695	protein_coding	4283.18	-0.0927621	0.101951	-0.909868	0.362892	0.443558
HACD3	ENSG00000074696	protein_coding	5012.2	-0.244441	0.0708213	-3.45152	0.000557439	0.00147954
IPCEF1	ENSG00000074706	protein_coding	66.9293	0.595169	0.163241	3.64596	0.000266396	0.000756076
ZZEF1	ENSG00000074755	protein_coding	2390.87	0.281867	0.0872495	3.23059	0.00123535	0.00303821
NOX3	ENSG00000074771	protein_coding	0.442212	-0.891044	0.590402	-1.50921	0.131244	0.188984
ENO1	ENSG00000074800	protein_coding	51258.1	0.102607	0.0924142	1.1103	0.266872	0.343283
SLC12A1	ENSG00000074803	protein_coding	1.66043	-0.490728	0.399108	-1.22956	0.218861	0.291095
MYDGF	ENSG00000074842	protein_coding	4463.22	-0.0323924	0.101984	-0.317623	0.750771	0.801746
ANO8	ENSG00000074855	protein_coding	453.204	0.34983	0.102479	3.41367	0.000640942	0.00167773
TUBE1	ENSG00000074935	protein_coding	477.817	-0.81276	0.0782851	-10.3821	2.9927e-25	1.7892e-23
ARHGEF10L	ENSG00000074964	protein_coding	3774.61	0.00939458	0.0928972	0.101129	0.919448	0.938607
TXK	ENSG00000074966	protein_coding	33.8739	0.258862	0.152307	1.69961	0.089205	0.135608
WSCD2	ENSG00000075035	protein_coding	14.2477	1.46509	0.266404	5.4995	3.80877e-08	2.23992e-07
KCNQ2	ENSG00000075043	protein_coding	8.4124	0.310549	0.302286	1.02733	0.304263	0.382964
TACR2	ENSG00000075073	protein_coding	132.917	1.42039	0.214506	6.6217	3.55081e-11	3.58859e-10
ACTR6	ENSG00000075089	protein_coding	698.309	-0.303064	0.07248	-4.18134	2.89794e-05	0.000100021
TIPIN	ENSG00000075131	protein_coding	278.656	-0.194457	0.0850654	-2.28597	0.0222559	0.0403206
SRI	ENSG00000075142	protein_coding	6015.96	-0.453207	0.10187	-4.44886	8.63274e-06	3.29584e-05
EIF4G3	ENSG00000075151	protein_coding	2524.29	-0.0910268	0.0783203	-1.16224	0.245139	0.319637
NUP37	ENSG00000075188	protein_coding	1258.82	-0.413206	0.0726076	-5.69095	1.26336e-08	8.10745e-08
SEMA3A	ENSG00000075213	protein_coding	625.169	-0.422489	0.175825	-2.4029	0.0162657	0.0305077
GTSE1	ENSG00000075218	protein_coding	778.377	0.0101855	0.0782932	0.130094	0.896492	0.921112
SEMA3C	ENSG00000075223	protein_coding	2671.15	-0.323289	0.12195	-2.65099	0.00802554	0.0162738
TTC38	ENSG00000075234	protein_coding	3430.61	-0.196149	0.104748	-1.87258	0.0611262	0.0974652
ACAT1	ENSG00000075239	protein_coding	1942.89	-0.303866	0.0845024	-3.59595	0.000323215	0.000900717
GRAMD4	ENSG00000075240	protein_coding	2061.88	-0.0359778	0.0829545	-0.433705	0.664502	0.726324
CELSR1	ENSG00000075275	protein_coding	1634.44	-0.0498669	0.127561	-0.390927	0.695851	0.75414
WNT8B	ENSG00000075290	protein_coding	10.0477	0.226274	0.213327	1.06069	0.288831	0.366754
ZNF638	ENSG00000075292	protein_coding	2700.73	-0.468297	0.0870528	-5.37946	7.47097e-08	4.18066e-07
SLC25A40	ENSG00000075303	protein_coding	892.337	-0.398947	0.0854683	-4.66778	3.0447e-06	1.26984e-05
TIMM21	ENSG00000075336	protein_coding	572.318	0.0306773	0.0722288	0.424723	0.671039	0.732128
ADD2	ENSG00000075340	protein_coding	32.0917	1.14093	0.242134	4.71199	2.45311e-06	1.04045e-05
FGF4	ENSG00000075388	protein_coding	2.86282	-0.279604	0.280649	-0.996277	0.319116	0.398303
RASAL2	ENSG00000075391	protein_coding	1166.33	-0.0554015	0.0917725	-0.603683	0.546055	0.620155
VPS9D1	ENSG00000075399	protein_coding	456.891	0.275085	0.089414	3.07653	0.00209422	0.00489152
ZNF37A	ENSG00000075407	protein_coding	761.154	-0.388505	0.095373	-4.07354	4.63045e-05	0.000153821
MARK3	ENSG00000075413	protein_coding	1964.83	-0.00593908	0.0514529	-0.115428	0.908106	0.929754
SLC25A3	ENSG00000075415	protein_coding	17136	-0.159183	0.0648516	-2.45458	0.0141051	0.0268604
FNDC3B	ENSG00000075420	protein_coding	3519.11	-0.206655	0.100645	-2.05331	0.0400421	0.067409
FOSL2	ENSG00000075426	protein_coding	5060.48	0.456207	0.0799718	5.7046	1.16614e-08	7.52516e-08
CACNG5	ENSG00000075429	protein_coding	0.284392	0.449759	0.620136	0.725259	0.468293	0.546556
CACNG4	ENSG00000075461	protein_coding	153.143	0.555301	0.336495	1.65025	0.0988922	0.148397
FRYL	ENSG00000075539	protein_coding	3952.1	-0.573163	0.120155	-4.77018	1.8406e-06	8.00735e-06
TMEM131	ENSG00000075568	protein_coding	2794.05	-0.0824618	0.0596991	-1.38129	0.16719	0.231721
FSCN1	ENSG00000075618	protein_coding	2686.6	0.876608	0.182729	4.7973	1.60818e-06	7.06464e-06
ACTB	ENSG00000075624	protein_coding	223612	0.362942	0.0899431	4.03524	5.45457e-05	0.000178697
MOCOS	ENSG00000075643	protein_coding	708.628	-0.0679006	0.104074	-0.652427	0.514126	0.590385
PLD1	ENSG00000075651	protein_coding	1095.6	-0.382724	0.105265	-3.63581	0.000277114	0.000783371
ATP12A	ENSG00000075673	protein_coding	26.1123	1.57319	0.396633	3.96636	7.2979e-05	0.000232702
WDR62	ENSG00000075702	protein_coding	609.417	0.129789	0.0940971	1.37931	0.167798	0.232403
DLG1	ENSG00000075711	protein_coding	2525.16	-0.440767	0.0716186	-6.15436	7.53791e-10	6.03928e-09
RAB7A	ENSG00000075785	protein_coding	9408.76	-0.0883064	0.0577224	-1.52985	0.126055	0.182581
BCAP29	ENSG00000075790	protein_coding	1477.32	-0.243005	0.0739409	-3.28648	0.00101446	0.00254362
SEC31B	ENSG00000075826	protein_coding	230.619	-0.0617707	0.130007	-0.475133	0.634692	0.700243
SART3	ENSG00000075856	protein_coding	2452.19	0.0033279	0.0446677	0.0745035	0.94061	0.95527
ARHGAP15	ENSG00000075884	protein_coding	146.425	0.906738	0.140083	6.47288	9.61505e-11	9.00724e-10
TUBA3D	ENSG00000075886	protein_coding	12.0833	-0.251459	0.131597	-1.91082	0.0560278	0.0902588
PAX2	ENSG00000075891	protein_coding	3.65905	-0.0190329	0.308954	-0.0616042	0.950878	0.962859
EXOSC7	ENSG00000075914	protein_coding	1417.11	-0.297574	0.0740075	-4.02085	5.79876e-05	0.000189025
KIFAP3	ENSG00000075945	protein_coding	1102.97	-0.11785	0.0765665	-1.53918	0.12376	0.17975
MKRN2	ENSG00000075975	protein_coding	1165	-0.158053	0.0499486	-3.16432	0.00155447	0.00373814
MCM6	ENSG00000076003	protein_coding	2758.69	-0.0487612	0.0680582	-0.716464	0.473705	0.551824
REXO2	ENSG00000076043	protein_coding	1890.5	-0.11934	0.0720602	-1.65612	0.0976973	0.146883
RBM7	ENSG00000076053	protein_coding	1018.04	-0.199285	0.0755915	-2.63635	0.00838043	0.0169057
RBMS2	ENSG00000076067	protein_coding	1631.51	0.17223	0.074974	2.29719	0.0216077	0.0392568
BAZ2A	ENSG00000076108	protein_coding	4561.2	0.336575	0.0607025	5.54466	2.94522e-08	1.76558e-07
PTPN23	ENSG00000076201	protein_coding	2857.44	0.311112	0.0785819	3.95908	7.52384e-05	0.000239286
MLH1	ENSG00000076242	protein_coding	916.878	-0.237049	0.0913068	-2.59618	0.00942656	0.0187608
UNG	ENSG00000076248	protein_coding	2624.39	-0.109914	0.0717904	-1.53104	0.125759	0.182231
FMO4	ENSG00000076258	protein_coding	115.208	-0.39021	0.103404	-3.77365	0.000160877	0.00047766
KLHL20	ENSG00000076321	protein_coding	515.161	0.0367439	0.0613884	0.598547	0.549475	0.623372
RGS11	ENSG00000076344	protein_coding	148.749	0.37163	0.196928	1.88714	0.0591416	0.0946473
SLC46A1	ENSG00000076351	protein_coding	227.212	-0.147289	0.110104	-1.33772	0.180989	0.24763
PLXNA2	ENSG00000076356	protein_coding	2045.6	-0.0968594	0.0963916	-1.00485	0.314968	0.393969
SPAG5	ENSG00000076382	protein_coding	1462.86	-0.294481	0.0773396	-3.80764	0.000140299	0.000421926
ANKRD13A	ENSG00000076513	protein_coding	1424.73	0.113226	0.0593819	1.90675	0.0565533	0.0909861
TPD52	ENSG00000076554	protein_coding	6168.17	-0.433082	0.0901604	-4.80346	1.55944e-06	6.86711e-06
ACACB	ENSG00000076555	protein_coding	692.133	0.153174	0.110558	1.38546	0.165911	0.230277
TRAF4	ENSG00000076604	protein_coding	3700.5	-0.229389	0.0987076	-2.32393	0.0201294	0.0368854
PAG1	ENSG00000076641	protein_coding	1074.89	-0.173805	0.135515	-1.28255	0.199651	0.269238
GPATCH1	ENSG00000076650	protein_coding	488.58	-0.114285	0.0549257	-2.08072	0.0374592	0.0636169
ICAM3	ENSG00000076662	protein_coding	64.2327	1.80268	0.162849	11.0696	1.76131e-28	1.36559e-26
NT5C2	ENSG00000076685	protein_coding	1153.81	-0.0240666	0.0691316	-0.348127	0.727745	0.78167
MCAM	ENSG00000076706	protein_coding	2654.66	0.889199	0.10642	8.3556	6.51024e-17	1.64488e-15
GPC4	ENSG00000076716	protein_coding	2481.68	-0.234697	0.106868	-2.19614	0.0280821	0.0494272
MBNL3	ENSG00000076770	protein_coding	1165.46	-0.528288	0.111572	-4.73495	2.19104e-06	9.37478e-06
CAMSAP3	ENSG00000076826	protein_coding	2304.93	0.00170799	0.0976469	0.0174915	0.986045	0.989362
RAP1GAP	ENSG00000076864	protein_coding	1795.7	-0.432748	0.183489	-2.35843	0.0183522	0.033997
XAB2	ENSG00000076924	protein_coding	2364.04	0.123349	0.0989839	1.24615	0.212709	0.284115
ARHGEF1	ENSG00000076928	protein_coding	4267.48	0.160214	0.0875653	1.82965	0.0673028	0.106047
STXBP2	ENSG00000076944	protein_coding	2370.31	-0.0124888	0.0944877	-0.132174	0.894847	0.919874
MAP2K7	ENSG00000076984	protein_coding	1388.78	0.159319	0.0650174	2.4504	0.0142696	0.0271415
NMRK2	ENSG00000077009	protein_coding	0.768218	-0.249733	0.503578	-0.495917	0.619953	0.687137
DGKD	ENSG00000077044	protein_coding	2248.74	-0.197826	0.0730678	-2.70743	0.00678058	0.013991
CTTNBP2	ENSG00000077063	protein_coding	422.308	-0.468634	0.196425	-2.38582	0.0170412	0.0318166
ACTL6B	ENSG00000077080	protein_coding	0.996005	0.332391	0.292568	1.13612	0.255908	0.331445
RARB	ENSG00000077092	protein_coding	108.947	0.463391	0.140664	3.2943	0.000986677	0.00248064
TOP2B	ENSG00000077097	protein_coding	4479.51	-0.160314	0.0764675	-2.0965	0.0360383	0.0614872
TM9SF3	ENSG00000077147	protein_coding	13771.5	-0.357123	0.0698073	-5.11584	3.12346e-07	1.56416e-06
NFKB2	ENSG00000077150	protein_coding	1979.1	0.755863	0.0882935	8.5608	1.1209e-17	3.12699e-16
UBE2T	ENSG00000077152	protein_coding	989.107	-0.544308	0.0923522	-5.89383	3.77356e-09	2.67465e-08
PPP1R12B	ENSG00000077157	protein_coding	2132.9	0.462111	0.154775	2.98569	0.0028294	0.00640351
DNAJC10	ENSG00000077232	protein_coding	4657.49	-0.291383	0.0790884	-3.68427	0.000229357	0.000660444
GTF3C1	ENSG00000077235	protein_coding	3148	0.106688	0.0627059	1.7014	0.0888688	0.135161
IL4R	ENSG00000077238	protein_coding	2938.9	0.28426	0.0687925	4.13213	3.59416e-05	0.000121797
USP33	ENSG00000077254	protein_coding	1925.38	-0.251313	0.0738788	-3.40169	0.000669712	0.00174604
PAK3	ENSG00000077264	protein_coding	16.3154	0.617367	0.217975	2.83228	0.00462175	0.00992665
CAPN6	ENSG00000077274	protein_coding	483.911	-0.553999	0.295135	-1.8771	0.060504	0.0965688
DCX	ENSG00000077279	protein_coding	2.76048	0.120463	0.281418	0.428056	0.66861	0.730031
SNRPA	ENSG00000077312	protein_coding	2935.97	-0.131692	0.0751799	-1.75169	0.0798273	0.122972
SPAG6	ENSG00000077327	protein_coding	1.55131	-0.129263	0.325469	-0.397159	0.691251	0.750087
EXOSC5	ENSG00000077348	protein_coding	1381.93	-0.384795	0.111472	-3.45195	0.000556553	0.00147766
DYNC1I2	ENSG00000077380	protein_coding	2846.1	-0.151867	0.0465818	-3.26023	0.00111322	0.00276717
APBB1IP	ENSG00000077420	protein_coding	241.439	1.80872	0.138211	13.0867	3.923e-39	6.9467e-37
LRCH4	ENSG00000077454	protein_coding	603.691	0.231908	0.0874483	2.65195	0.00800296	0.0162312
FAM76B	ENSG00000077458	protein_coding	501.024	-0.317155	0.0831661	-3.81351	0.000137005	0.000412705
SIRT6	ENSG00000077463	protein_coding	1205.21	0.030829	0.0995646	0.309638	0.756836	0.806779
TYR	ENSG00000077498	protein_coding	2.4733	-1.18655	0.533761	-2.22301	0.0262153	0.0465256
POLD3	ENSG00000077514	protein_coding	983.383	-0.0974095	0.0622018	-1.56602	0.117343	0.171803
ACTN2	ENSG00000077522	protein_coding	3.62809	1.08025	0.222131	4.86313	1.15542e-06	5.20369e-06
CAPZB	ENSG00000077549	protein_coding	7294.93	0.231602	0.0681371	3.39905	0.000676191	0.00176183
GPR137B	ENSG00000077585	protein_coding	584.059	0.276706	0.0906911	3.05108	0.00228019	0.00527387
NAALAD2	ENSG00000077616	protein_coding	22.5843	-0.568661	0.166401	-3.41742	0.000632183	0.00165771
JADE1	ENSG00000077684	protein_coding	737.858	0.0134872	0.0805891	0.167358	0.867089	0.897788
SLC25A43	ENSG00000077713	protein_coding	1188.77	-0.286139	0.0692751	-4.13048	3.62006e-05	0.000122599
UBE2A	ENSG00000077721	protein_coding	3072.26	-0.251012	0.0680829	-3.68686	0.000227035	0.000654366
FGFR1	ENSG00000077782	protein_coding	1129.6	1.48198	0.124404	11.9127	1.01635e-32	1.07256e-30
FKBP6	ENSG00000077800	protein_coding	0.822486	-0.753012	0.341745	-2.20343	0.0275645	0.0486145
SMC1B	ENSG00000077935	protein_coding	15.8703	-0.11598	0.221823	-0.522847	0.601081	0.66988
FBLN1	ENSG00000077942	protein_coding	3588.49	2.10113	0.154803	13.5729	5.79655e-42	1.27493e-39
ITGA8	ENSG00000077943	protein_coding	147.955	0.508541	0.127938	3.97492	7.04044e-05	0.000225387
CST7	ENSG00000077984	protein_coding	190.003	0.89545	0.172574	5.18879	2.11668e-07	1.09273e-06
MAP2	ENSG00000078018	protein_coding	58.5068	0.47968	0.184812	2.59551	0.00944519	0.0187947
PIAS2	ENSG00000078043	protein_coding	650.273	-0.343325	0.108276	-3.17082	0.00152011	0.00366416
AMPH	ENSG00000078053	protein_coding	41.7776	1.33416	0.154001	8.66337	4.58027e-18	1.34985e-16
ARAF	ENSG00000078061	protein_coding	3085.89	0.13783	0.0860712	1.60135	0.109299	0.161694
MCCC1	ENSG00000078070	protein_coding	1046.46	-0.210032	0.0676069	-3.10667	0.0018921	0.00446476
LAMP3	ENSG00000078081	protein_coding	363.166	1.08087	0.117162	9.22548	2.82288e-20	1.05329e-18
FAP	ENSG00000078098	protein_coding	592.112	1.02819	0.203651	5.04878	4.44649e-07	2.16522e-06
NEBL	ENSG00000078114	protein_coding	3721.03	-0.787005	0.101585	-7.74728	9.38837e-15	1.74606e-13
ACER3	ENSG00000078124	protein_coding	1087.96	-0.260139	0.0787768	-3.30223	0.000959195	0.00241824
UBE2K	ENSG00000078140	protein_coding	3615.52	-0.336942	0.0594621	-5.66651	1.45736e-08	9.24177e-08
PIK3C3	ENSG00000078142	protein_coding	857.008	-0.0421484	0.0805563	-0.523216	0.600824	0.669665
N4BP2	ENSG00000078177	protein_coding	426.539	-0.492292	0.127331	-3.86623	0.000110531	0.000339615
TIGAR	ENSG00000078237	protein_coding	589.119	-0.167708	0.0892587	-1.8789	0.0602588	0.0962289
TULP3	ENSG00000078246	protein_coding	767.576	0.23027	0.0507412	4.53811	5.67594e-06	2.24325e-05
SYNJ2	ENSG00000078269	protein_coding	1899.53	-0.320049	0.0631099	-5.0713	3.95117e-07	1.94212e-06
ADCY2	ENSG00000078295	protein_coding	42.5617	1.2922	0.162835	7.93565	2.09395e-15	4.28532e-14
PPP2R5C	ENSG00000078304	protein_coding	4856.97	-0.310602	0.0626222	-4.95994	7.05162e-07	3.30626e-06
PMS2P1	ENSG00000078319	transcribed_unprocessed_pseudogene	235.589	-0.344963	0.0750243	-4.59802	4.26522e-06	1.72633e-05
RBFOX1	ENSG00000078328	protein_coding	18.0761	-0.44085	0.369896	-1.19182	0.233332	0.306875
GNB1	ENSG00000078369	protein_coding	13262.5	0.184091	0.0542739	3.39188	0.000694144	0.00180467
HOXA9	ENSG00000078399	protein_coding	1170.79	-0.575759	0.160459	-3.58821	0.000332959	0.000925422
EDN1	ENSG00000078401	protein_coding	716.516	0.262833	0.160763	1.63491	0.102068	0.152554
MLLT10	ENSG00000078403	protein_coding	999.869	-0.223608	0.0576056	-3.88171	0.000103723	0.000320509
ZCWPW1	ENSG00000078487	protein_coding	114.973	-0.153559	0.126018	-1.21855	0.223016	0.295681
ADCYAP1R1	ENSG00000078549	protein_coding	13.1782	1.79249	0.272107	6.58745	4.47448e-11	4.43732e-10
FGF20	ENSG00000078579	protein_coding	27.4124	-0.51598	0.391521	-1.31789	0.187541	0.255205
P2RY10	ENSG00000078589	protein_coding	48.4858	1.8769	0.183271	10.2411	1.29692e-24	7.3142e-23
ITM2A	ENSG00000078596	protein_coding	256.331	1.50125	0.142647	10.5242	6.68222e-26	4.21828e-24
NRDC	ENSG00000078618	protein_coding	4023.21	-0.0840579	0.0385864	-2.17843	0.0293739	0.0514237
VDAC3	ENSG00000078668	protein_coding	4409.11	-0.273592	0.079311	-3.4496	0.000561413	0.00148914
PCM1	ENSG00000078674	protein_coding	3128.87	-0.247413	0.093678	-2.6411	0.00826381	0.0167043
TNRC6C	ENSG00000078687	protein_coding	524.361	0.158196	0.0877436	1.80294	0.071398	0.111624
CBFA2T2	ENSG00000078699	protein_coding	1845.09	-0.213215	0.0803632	-2.65314	0.00797466	0.0161824
BRINP1	ENSG00000078725	protein_coding	22.6978	-0.482569	0.24834	-1.94318	0.051995	0.0846495
ITCH	ENSG00000078747	protein_coding	2874.09	-0.428374	0.0834682	-5.13218	2.86401e-07	1.44497e-06
PKD2L2	ENSG00000078795	protein_coding	5.46505	-1.73281	0.229042	-7.56547	3.86453e-14	6.5173e-13
TP53INP2	ENSG00000078804	protein_coding	1415.56	0.68371	0.127468	5.36378	8.14963e-08	4.52829e-07
SDF4	ENSG00000078808	protein_coding	6754.63	0.145465	0.0859992	1.69147	0.0907479	0.137679
MYH7B	ENSG00000078814	protein_coding	167.217	-1.19623	0.197978	-6.04227	1.51964e-09	1.1557e-08
BPIFB2	ENSG00000078898	protein_coding	3.40366	-0.713741	0.526041	-1.35682	0.17484	0.240537
TP73	ENSG00000078900	protein_coding	192.687	0.644976	0.171134	3.76883	0.000164016	0.000486252
TOLLIP	ENSG00000078902	protein_coding	2585.96	0.0872666	0.0819663	1.06467	0.287027	0.364841
UBE2D4	ENSG00000078967	protein_coding	589.218	-0.332781	0.0545109	-6.10485	1.029e-09	8.04418e-09
CLUL1	ENSG00000079101	protein_coding	5.2289	-0.526069	0.185957	-2.82898	0.00466971	0.0100183
RUNX1T1	ENSG00000079102	protein_coding	134.649	0.508647	0.191177	2.66062	0.00779981	0.0158638
CDH17	ENSG00000079112	protein_coding	19793.3	-0.549963	0.115557	-4.75923	1.94329e-06	8.40835e-06
THOC1	ENSG00000079134	protein_coding	671.154	-0.319106	0.0752183	-4.2424	2.21146e-05	7.81077e-05
FKBP7	ENSG00000079150	protein_coding	273.777	0.366265	0.0947178	3.86691	0.000110222	0.00033874
OSBPL6	ENSG00000079156	protein_coding	79.9995	0.25922	0.214618	1.20782	0.227117	0.300345
SLC1A3	ENSG00000079215	protein_coding	222.78	1.16248	0.206788	5.62163	1.89164e-08	1.17287e-07
XRCC5	ENSG00000079246	protein_coding	12396	-0.246576	0.049768	-4.95451	7.25122e-07	3.39206e-06
LXN	ENSG00000079257	protein_coding	560.448	0.144915	0.109896	1.31866	0.187283	0.25487
SP140	ENSG00000079263	protein_coding	127.503	1.72441	0.176269	9.78283	1.33422e-22	6.25778e-21
MKNK1	ENSG00000079277	protein_coding	974.906	0.192225	0.0521968	3.6827	0.00023078	0.000663979
TNS1	ENSG00000079308	protein_coding	3375.86	1.44644	0.166353	8.69498	3.46887e-18	1.04216e-16
REXO1	ENSG00000079313	protein_coding	1625.03	0.180663	0.0947152	1.90744	0.0564637	0.090859
SAR1A	ENSG00000079332	protein_coding	3320.27	-0.19879	0.0535561	-3.71181	0.000205784	0.000598781
CDC14A	ENSG00000079335	protein_coding	227.318	0.0146275	0.0947591	0.154365	0.877322	0.905803
RAPGEF3	ENSG00000079337	protein_coding	365.233	0.146386	0.112388	1.30251	0.192742	0.261262
CEACAM1	ENSG00000079385	protein_coding	7336.72	-0.210058	0.134709	-1.55935	0.118915	0.173848
SENP1	ENSG00000079387	protein_coding	753.28	-0.115697	0.0652788	-1.77235	0.0763362	0.118393
DUSP13	ENSG00000079393	protein_coding	0.901727	-0.26309	0.345011	-0.762555	0.445729	0.525356
CIC	ENSG00000079432	protein_coding	2418.26	0.510921	0.0796805	6.41211	1.43516e-10	1.30239e-09
LIPE	ENSG00000079435	protein_coding	362.087	0.34919	0.105087	3.32285	0.000891034	0.00226168
FDFT1	ENSG00000079459	protein_coding	8332.16	-0.20301	0.100082	-2.02844	0.0425154	0.0710404
PAFAH1B3	ENSG00000079462	protein_coding	1765.45	-0.178569	0.11783	-1.51548	0.12965	0.187082
OPHN1	ENSG00000079482	protein_coding	350.419	-0.370777	0.103289	-3.58971	0.000331045	0.000920695
AFM	ENSG00000079557	protein_coding	0.477378	-1.17239	0.566069	-2.0711	0.0383492	0.0649304
KIF22	ENSG00000079616	protein_coding	2491.99	-0.131383	0.0765866	-1.71549	0.0862559	0.131623
SCGN	ENSG00000079689	protein_coding	18.4504	1.065	0.270109	3.94287	8.05126e-05	0.000254395
CARMIL1	ENSG00000079691	protein_coding	1896.95	-0.158865	0.0779992	-2.03675	0.0416752	0.069815
PGM1	ENSG00000079739	protein_coding	2413.28	0.100351	0.0981233	1.0227	0.30645	0.385124
DDX1	ENSG00000079785	protein_coding	4441.83	-0.253341	0.0488723	-5.18374	2.17483e-07	1.12025e-06
DNM2	ENSG00000079805	protein_coding	10220.9	0.08627	0.0780348	1.10553	0.268929	0.345514
EPB41L2	ENSG00000079819	protein_coding	7304.16	0.167545	0.0944548	1.77382	0.0760935	0.118082
RIMS1	ENSG00000079841	protein_coding	11.1208	0.308217	0.327735	0.940445	0.346989	0.427396
MOXD1	ENSG00000079931	protein_coding	397.884	1.71792	0.151733	11.322	1.02093e-29	8.68936e-28
STX7	ENSG00000079950	protein_coding	2323.46	-0.264669	0.0710911	-3.72295	0.000196911	0.000575007
RABL2B	ENSG00000079974	protein_coding	438.711	0.0980646	0.0695148	1.4107	0.158333	0.221258
KEAP1	ENSG00000079999	protein_coding	3576.12	0.140356	0.0936104	1.49936	0.133779	0.191973
DDX43	ENSG00000080007	protein_coding	49.8286	-0.181005	0.302167	-0.599023	0.549157	0.623148
PTPRH	ENSG00000080031	protein_coding	1539.37	0.11731	0.131435	0.892534	0.372107	0.452716
DCT	ENSG00000080166	protein_coding	9.87889	-0.192329	0.315719	-0.609179	0.542406	0.616874
SLC35C2	ENSG00000080189	protein_coding	3007.12	-0.207622	0.0746828	-2.78005	0.00543506	0.0114869
CRYBG3	ENSG00000080200	protein_coding	570.187	-0.345737	0.154346	-2.24002	0.0250895	0.0447843
EPHA6	ENSG00000080224	protein_coding	3.9638	0.145329	0.35165	0.413278	0.679403	0.739362
SCTR	ENSG00000080293	protein_coding	7.31686	-0.055831	0.21542	-0.259174	0.795501	0.838817
RFX3	ENSG00000080298	protein_coding	462.811	-0.446504	0.103769	-4.30285	1.68614e-05	6.09285e-05
RIF1	ENSG00000080345	protein_coding	2318.78	-0.717084	0.112748	-6.36004	2.01696e-10	1.78465e-09
RAB21	ENSG00000080371	protein_coding	2323.42	-0.344715	0.0757022	-4.55357	5.27429e-06	2.09757e-05
SLC4A4	ENSG00000080493	protein_coding	437.922	0.249563	0.248779	1.00315	0.315788	0.394829
SMARCA2	ENSG00000080503	protein_coding	2767.71	0.168597	0.0819039	2.05847	0.039545	0.0666957
RDH8	ENSG00000080511	protein_coding	1.55659	0.659955	0.316052	2.08812	0.0367869	0.0625921
SESN1	ENSG00000080546	protein_coding	2006.61	-0.542017	0.14402	-3.76349	0.000167556	0.000495974
MID2	ENSG00000080561	protein_coding	113.51	0.297552	0.143484	2.07376	0.0381015	0.0645686
DNAAF6	ENSG00000080572	protein_coding	0.458641	-0.353232	0.593461	-0.595207	0.551705	0.625257
COL5A3	ENSG00000080573	protein_coding	816.082	1.25803	0.142955	8.80018	1.36597e-18	4.27914e-17
SRCAP	ENSG00000080603	protein_coding	6179.4	0.311491	0.0680659	4.57632	4.73226e-06	1.89972e-05
PUM3	ENSG00000080608	protein_coding	1791.56	-0.357189	0.0617811	-5.78153	7.40222e-09	4.96451e-08
CPB2	ENSG00000080618	protein_coding	2.52677	-1.11252	0.276899	-4.01779	5.87463e-05	0.0001912
CHRNA3	ENSG00000080644	protein_coding	81.2461	1.42531	0.200494	7.10896	1.16918e-12	1.53745e-11
KCNN2	ENSG00000080709	protein_coding	30.9946	0.455358	0.174202	2.61396	0.00894987	0.0179229
CNOT4	ENSG00000080802	protein_coding	780.525	-0.192875	0.0611508	-3.15409	0.00161002	0.0038584
PSEN1	ENSG00000080815	protein_coding	3418.23	-0.0419767	0.0524343	-0.800558	0.423388	0.503497
CPOX	ENSG00000080819	protein_coding	1136.9	-0.131595	0.0572571	-2.29831	0.0215441	0.0391498
CLDND1	ENSG00000080822	protein_coding	1580.92	-0.292654	0.0693678	-4.21887	2.45531e-05	8.60005e-05
MOK	ENSG00000080823	protein_coding	265.895	-0.205096	0.129242	-1.58691	0.112532	0.165752
HSP90AA1	ENSG00000080824	protein_coding	42391.5	0.00153974	0.0733701	0.0209859	0.983257	0.98732
RBL1	ENSG00000080839	protein_coding	756.355	-0.550421	0.0968435	-5.68361	1.31878e-08	8.43073e-08
DLGAP4	ENSG00000080845	protein_coding	3736.82	0.0807319	0.0726488	1.11126	0.266455	0.342821
IGSF9B	ENSG00000080854	protein_coding	68.1649	0.443574	0.169352	2.61925	0.00881228	0.0176754
CFHR2	ENSG00000080910	protein_coding	0.03324	-0.194137	2.89736	-0.0670047	0.946578
CROCCP3	ENSG00000080947	transcribed_unprocessed_pseudogene	70.3114	-0.147415	0.133364	-1.10536	0.269005	0.345527
NDC80	ENSG00000080986	protein_coding	566.82	-0.194517	0.088765	-2.19137	0.0284253	0.0499787
AP4E1	ENSG00000081014	protein_coding	412.203	-0.0427388	0.0736877	-0.579999	0.561915	0.634781
RSBN1	ENSG00000081019	protein_coding	981.076	-0.367202	0.0842669	-4.35761	1.31491e-05	4.85467e-05
MAGI3	ENSG00000081026	protein_coding	891.029	-0.333168	0.0867144	-3.84213	0.000121972	0.000371004
CXCL2	ENSG00000081041	protein_coding	862.129	-0.029947	0.180073	-0.166304	0.867918	0.898468
AFP	ENSG00000081051	protein_coding	8.45319	-0.464436	0.295029	-1.5742	0.11544	0.169395
COL4A4	ENSG00000081052	protein_coding	110.124	0.428557	0.224627	1.90786	0.0564094	0.090786
TCF7	ENSG00000081059	protein_coding	1969.29	-0.312325	0.110702	-2.82132	0.00478262	0.0102306
OSTM1	ENSG00000081087	protein_coding	816.627	0.00816283	0.0827689	0.098622	0.921438	0.940132
CDH7	ENSG00000081138	protein_coding	11.0036	-0.647643	0.337145	-1.92096	0.0547365	0.0884478
IMPG2	ENSG00000081148	protein_coding	11.1515	-0.141431	0.197534	-0.715982	0.474002	0.552133
PCNP	ENSG00000081154	protein_coding	3638.49	-0.380745	0.0780546	-4.87793	1.07203e-06	4.85482e-06
EXD2	ENSG00000081177	protein_coding	909.75	0.0260325	0.0516983	0.503547	0.61458	0.682213
ARG2	ENSG00000081181	protein_coding	182.629	-0.457843	0.118113	-3.87632	0.00010605	0.000327047
MEF2C	ENSG00000081189	protein_coding	434.872	0.678129	0.138308	4.90304	9.43646e-07	4.32116e-06
PTPRC	ENSG00000081237	protein_coding	1383.1	1.24616	0.18884	6.59902	4.13871e-11	4.13376e-10
CACNA1S	ENSG00000081248	protein_coding	3.03483	-0.379642	0.256798	-1.47837	0.139309	0.198693
PKP1	ENSG00000081277	protein_coding	574.382	-0.0823937	0.247838	-0.33245	0.739549	0.792111
UBA5	ENSG00000081307	protein_coding	1189.68	-0.361311	0.0608035	-5.94228	2.81092e-09	2.03761e-08
STK17B	ENSG00000081320	protein_coding	1511.27	-0.0375004	0.102391	-0.366247	0.71418	0.769911
CDC14B	ENSG00000081377	protein_coding	927.851	-0.177757	0.0800754	-2.21987	0.0264275	0.0468544
ZNF510	ENSG00000081386	protein_coding	362.766	-0.362882	0.0766474	-4.73443	2.19667e-06	9.39502e-06
LRP2	ENSG00000081479	protein_coding	6.30465	0.0269422	0.313334	0.0859854	0.931478	0.948085
ZNF506	ENSG00000081665	protein_coding	575.123	-0.60618	0.110446	-5.48849	4.0539e-08	2.37172e-07
JMJD4	ENSG00000081692	protein_coding	548.618	-0.251203	0.0753383	-3.33433	0.000855041	0.00218012
DUSP12	ENSG00000081721	protein_coding	522.911	-0.196151	0.0570178	-3.44017	0.000581352	0.00153793
AACS	ENSG00000081760	protein_coding	2008.72	-0.0846608	0.0751813	-1.12609	0.260128	0.336056
DELE1	ENSG00000081791	protein_coding	2236.34	-0.205944	0.0528151	-3.89934	9.64544e-05	0.000300025
SLC13A1	ENSG00000081800	protein_coding	1.88423	-0.233404	0.57946	-0.402796	0.687099	0.746357
CADPS2	ENSG00000081803	protein_coding	1010.64	0.037623	0.105512	0.356577	0.721409	0.776121
PCDHB4	ENSG00000081818	protein_coding	41.7917	0.470311	0.183558	2.56219	0.0104014	0.0205075
PCDHA6	ENSG00000081842	protein_coding	3.7564	0.445006	0.255173	1.74394	0.0811691	0.124795
PCDHGA2	ENSG00000081853	protein_coding	27.7018	-0.302042	0.164737	-1.83349	0.0667303	0.105252
HSPB11	ENSG00000081870	protein_coding	477.272	-0.453309	0.0725832	-6.24536	4.22819e-10	3.54883e-09
PHLPP1	ENSG00000081913	protein_coding	838.697	0.276488	0.0843135	3.27929	0.00104069	0.00260344
ATP8B1	ENSG00000081923	protein_coding	6122.78	-0.201271	0.0906253	-2.22091	0.0263567	0.0467507
IL12RB2	ENSG00000081985	protein_coding	24.4214	0.416869	0.173205	2.4068	0.0160931	0.0302193
SMARCD3	ENSG00000082014	protein_coding	248.642	0.595601	0.0986887	6.03515	1.58815e-09	1.20495e-08
WDR70	ENSG00000082068	protein_coding	949.524	-0.208659	0.0522433	-3.99399	6.49703e-05	0.000209596
FYB1	ENSG00000082074	protein_coding	506.272	1.24651	0.18034	6.91201	4.77846e-12	5.64579e-11
MPP4	ENSG00000082126	protein_coding	3.54519	0.0357452	0.176676	0.202321	0.839666	0.875512
STRADB	ENSG00000082146	protein_coding	635.925	-0.548426	0.0747124	-7.34049	2.12814e-13	3.17982e-12
BZW1	ENSG00000082153	protein_coding	4128.98	-0.278302	0.072233	-3.85284	0.000116756	0.000356616
PGR	ENSG00000082175	protein_coding	38.9455	0.68286	0.206975	3.29923	0.000969489	0.00244169
C1QTNF3	ENSG00000082196	protein_coding	163.536	0.46866	0.14379	3.25934	0.00111671	0.00277502
ME2	ENSG00000082212	protein_coding	2100.7	-0.0101496	0.0913623	-0.111091	0.911544	0.932542
C5orf22	ENSG00000082213	protein_coding	874.168	-0.160214	0.0651855	-2.45782	0.0139783	0.0266456
CCNT2	ENSG00000082258	protein_coding	1260.13	-0.521284	0.0747776	-6.97113	3.14413e-12	3.83966e-11
FAM135A	ENSG00000082269	protein_coding	1383.22	-0.621057	0.108632	-5.71707	1.08375e-08	7.03385e-08
COL19A1	ENSG00000082293	protein_coding	5.06529	0.14976	0.341635	0.438363	0.661123	0.723313
EPB41L3	ENSG00000082397	protein_coding	626.783	0.943825	0.184753	5.10857	3.24608e-07	1.62129e-06
COBLL1	ENSG00000082438	protein_coding	1028.84	-0.465742	0.100694	-4.62533	3.74006e-06	1.52987e-05
DLG3	ENSG00000082458	protein_coding	3683.15	-0.200292	0.073622	-2.72054	0.00651751	0.0135076
KCNK2	ENSG00000082482	protein_coding	10.7657	1.98006	0.286861	6.90251	5.10929e-12	5.99431e-11
SERTAD4	ENSG00000082497	protein_coding	164.351	0.122592	0.194386	0.630663	0.528261	0.603731
TRAF5	ENSG00000082512	protein_coding	2220.91	-0.676294	0.0986452	-6.85582	7.09043e-12	8.12251e-11
MRPL22	ENSG00000082515	protein_coding	1046.61	-0.392403	0.0832505	-4.71352	2.43479e-06	1.03321e-05
GEMIN5	ENSG00000082516	protein_coding	1173.04	-0.236369	0.0593331	-3.98377	6.78319e-05	0.000217861
OPRK1	ENSG00000082556	protein_coding	2.15808	-0.890983	0.410515	-2.1704	0.0299765	0.0523318
NFE2L1	ENSG00000082641	protein_coding	8117.91	0.138759	0.0658735	2.10645	0.0351654	0.0602008
SEMA5B	ENSG00000082684	protein_coding	56.191	0.685247	0.124769	5.49212	3.97137e-08	2.3267e-07
GSK3B	ENSG00000082701	protein_coding	2602.81	-0.301645	0.0550506	-5.47942	4.26716e-08	2.48571e-07
ITGB5	ENSG00000082781	protein_coding	4935.47	0.302476	0.0786279	3.84693	0.000119605	0.000364519
ERC1	ENSG00000082805	protein_coding	1527.89	0.239071	0.0765814	3.12179	0.00179754	0.00426185
XPO1	ENSG00000082898	protein_coding	6709.35	-0.375071	0.0678255	-5.52994	3.20345e-08	1.90891e-07
LINC01587	ENSG00000082929	lncRNA	0.795545	-1.58895	0.484373	-3.28042	0.00103653	0.00259428
RNF13	ENSG00000082996	protein_coding	1848.8	-0.273211	0.0666906	-4.09669	4.19095e-05	0.000140404
TRPM3	ENSG00000083067	protein_coding	17.0329	-1.55627	0.30368	-5.1247	2.98011e-07	1.49884e-06
PALB2	ENSG00000083093	protein_coding	682.854	-0.141028	0.0519945	-2.71236	0.00668069	0.0138067
DOP1A	ENSG00000083097	protein_coding	807.444	-0.653411	0.100577	-6.49666	8.21231e-11	7.79097e-10
LYRM2	ENSG00000083099	protein_coding	1165.11	-0.302334	0.0580889	-5.20468	1.94335e-07	1.01011e-06
BCKDHB	ENSG00000083123	protein_coding	1085.63	-0.490795	0.0713665	-6.8771	6.1082e-12	7.07397e-11
KAT6A	ENSG00000083168	protein_coding	2279.6	0.0192616	0.087999	0.218884	0.826741	0.865121
TUT7	ENSG00000083223	protein_coding	1376.56	-0.243403	0.0823562	-2.95549	0.00312176	0.00698946
ULK2	ENSG00000083290	protein_coding	440.598	-0.00374548	0.0890912	-0.042041	0.966466	0.974746
GRHL2	ENSG00000083307	protein_coding	2057.04	-0.267111	0.0618712	-4.31721	1.58012e-05	5.746e-05
TNPO1	ENSG00000083312	protein_coding	4609.98	-0.407325	0.0739376	-5.50904	3.6079e-08	2.13108e-07
PLOD1	ENSG00000083444	protein_coding	4948.51	0.31163	0.0857843	3.63272	0.00028045	0.000791893
P2RX5	ENSG00000083454	protein_coding	76.5115	0.579844	0.188301	3.07934	0.00207463	0.00485
ITGAE	ENSG00000083457	protein_coding	590.232	0.424308	0.0854064	4.96811	6.76087e-07	3.18064e-06
DIS3	ENSG00000083520	protein_coding	2376.4	-0.451054	0.0768292	-5.87087	4.33521e-09	3.03974e-08
PIBF1	ENSG00000083535	protein_coding	817.846	-0.698429	0.0947979	-7.36755	1.7379e-13	2.64002e-12
TDRD3	ENSG00000083544	protein_coding	851.341	-0.513428	0.0764638	-6.71465	1.88514e-11	2.00056e-10
AC000061.1	ENSG00000083622	lncRNA	11.9653	-2.24294	0.265549	-8.44643	3.00358e-17	7.96197e-16
NUFIP1	ENSG00000083635	protein_coding	551.275	-0.490398	0.0871792	-5.62517	1.85326e-08	1.15147e-07
PDS5B	ENSG00000083642	protein_coding	1720.38	-0.538895	0.0979763	-5.50026	3.79241e-08	2.23187e-07
OXCT1	ENSG00000083720	protein_coding	1011.16	0.229693	0.140016	1.64048	0.100906	0.151096
RRAGB	ENSG00000083750	protein_coding	369.675	-0.259009	0.0803704	-3.2227	0.00126991	0.00311385
EPYC	ENSG00000083782	protein_coding	56.7063	2.09845	0.341307	6.14827	7.83311e-10	6.25063e-09
CYLD	ENSG00000083799	protein_coding	1193.48	0.387032	0.09297	4.16298	3.14125e-05	0.000107645
SLC27A5	ENSG00000083807	protein_coding	413.789	-0.268487	0.157855	-1.70084	0.0889729	0.135295
ZNF324	ENSG00000083812	protein_coding	320.94	0.115833	0.0640481	1.80853	0.0705246	0.110474
ZNF671	ENSG00000083814	protein_coding	65.9744	0.505981	0.143597	3.52363	0.000425679	0.00115851
ZNF416	ENSG00000083817	protein_coding	164.259	-0.156141	0.0747096	-2.08998	0.03662	0.0623436
ZNF586	ENSG00000083828	protein_coding	276.652	-0.258798	0.0970791	-2.66584	0.00767957	0.0156536
ZNF446	ENSG00000083838	protein_coding	250.242	-0.0563967	0.0664642	-0.848527	0.396145	0.476482
ZNF264	ENSG00000083844	protein_coding	655.709	0.138182	0.14684	0.941042	0.346684	0.427069
RPS5	ENSG00000083845	protein_coding	42344.3	-0.392854	0.134033	-2.93103	0.00337845	0.00750388
FAT1	ENSG00000083857	protein_coding	17390.9	-0.056249	0.113378	-0.496119	0.61981	0.687016
YTHDC1	ENSG00000083896	protein_coding	2376.54	-0.110649	0.0396323	-2.7919	0.00524	0.0111163
CHMP2B	ENSG00000083937	protein_coding	2548.96	-0.229086	0.0728234	-3.14577	0.00165648	0.00395816
SMAP2	ENSG00000084070	protein_coding	1593.63	0.614156	0.0629906	9.74996	1.84541e-22	8.53093e-21
PPIE	ENSG00000084072	protein_coding	1587.95	-0.206124	0.067463	-3.05536	0.00224789	0.00521016
ZMPSTE24	ENSG00000084073	protein_coding	2684.72	-0.330105	0.0693308	-4.7613	1.92348e-06	8.32976e-06
STARD7	ENSG00000084090	protein_coding	6637.13	-0.146039	0.0411789	-3.54645	0.00039046	0.0010695
NOA1	ENSG00000084092	protein_coding	1668.02	-0.155227	0.0635414	-2.44294	0.0145684	0.0276519
REST	ENSG00000084093	protein_coding	1477.94	-0.410669	0.0937353	-4.38116	1.18048e-05	4.39251e-05
HAL	ENSG00000084110	protein_coding	24.3817	-0.134019	0.179137	-0.748138	0.454377	0.533475
SSH1	ENSG00000084112	protein_coding	1683.35	0.453952	0.0649282	6.99161	2.71758e-12	3.36098e-11
GSTP1	ENSG00000084207	protein_coding	23079.2	0.0281351	0.122328	0.229998	0.818093	0.857877
APLP2	ENSG00000084234	protein_coding	17249.1	0.146482	0.0588508	2.48904	0.0128087	0.0246273
FAM234B	ENSG00000084444	protein_coding	128.473	0.283162	0.125597	2.25453	0.0241628	0.0433337
SLCO1A2	ENSG00000084453	protein_coding	13.4036	-0.843169	0.352708	-2.39056	0.0168229	0.0314469
WBP11	ENSG00000084463	protein_coding	3373.37	0.0563643	0.0522034	1.07971	0.280273	0.357571
EIF3I	ENSG00000084623	protein_coding	9253.97	-0.312809	0.0766498	-4.08101	4.48409e-05	0.000149363
NKAIN1	ENSG00000084628	protein_coding	10.1127	1.20975	0.223706	5.40779	6.38088e-08	3.61765e-07
COL16A1	ENSG00000084636	protein_coding	1864.75	0.677984	0.15357	4.41482	1.01092e-05	3.80975e-05
TXLNA	ENSG00000084652	protein_coding	3034.72	0.145107	0.0475103	3.05422	0.00225649	0.00522605
APOB	ENSG00000084674	protein_coding	22.1389	-0.128787	0.356845	-0.360906	0.71817	0.773314
NCOA1	ENSG00000084676	protein_coding	1420.36	0.163147	0.0691769	2.35841	0.0183535	0.033998
AGBL5	ENSG00000084693	protein_coding	1240.97	-0.217809	0.0702845	-3.09896	0.00194204	0.00457228
EFR3B	ENSG00000084710	protein_coding	105.467	0.265237	0.144621	1.83401	0.066652	0.105153
KIF3C	ENSG00000084731	protein_coding	392.974	0.715496	0.102565	6.97603	3.03649e-12	3.71798e-11
RAB10	ENSG00000084733	protein_coding	6946.23	-0.266917	0.0475671	-5.61139	2.00708e-08	1.2371e-07
GCKR	ENSG00000084734	protein_coding	7.29952	-0.215412	0.217163	-0.991939	0.321227	0.400528
HADHA	ENSG00000084754	protein_coding	8601.83	-0.127525	0.0509436	-2.50325	0.0123057	0.0237894
MAPRE3	ENSG00000084764	protein_coding	617.223	-0.153427	0.131171	-1.16968	0.242132	0.316466
CAD	ENSG00000084774	protein_coding	3907.08	0.125365	0.0844058	1.48526	0.137475	0.19652
CD59	ENSG00000085063	protein_coding	7018.71	0.16181	0.0802691	2.01584	0.0438167	0.0729058
CD82	ENSG00000085117	protein_coding	2444.62	0.589082	0.104376	5.64382	1.66314e-08	1.04139e-07
BCORL1	ENSG00000085185	protein_coding	750.169	0.381523	0.0940965	4.05459	5.02218e-05	0.000165701
ATRX	ENSG00000085224	protein_coding	2455.96	-0.470123	0.115631	-4.06573	4.7882e-05	0.000158607
AK6	ENSG00000085231	protein_coding	583.095	-0.466363	0.0641607	-7.26867	3.63036e-13	5.20278e-12
FCN1	ENSG00000085265	protein_coding	136.779	2.19011	0.211113	10.3741	3.2511e-25	1.93814e-23
MYNN	ENSG00000085274	protein_coding	580.395	-0.539364	0.0688088	-7.83858	4.55655e-15	8.84843e-14
MECOM	ENSG00000085276	protein_coding	2679.68	-0.348132	0.0956391	-3.64006	0.000272569	0.000771988
SCAMP1	ENSG00000085365	protein_coding	1810.05	-0.446116	0.0807056	-5.52769	3.24473e-08	1.93131e-07
PREP	ENSG00000085377	protein_coding	4492.15	-0.235557	0.0700323	-3.36354	0.000769492	0.00198292
HACE1	ENSG00000085382	protein_coding	284.382	-0.297109	0.0978092	-3.03764	0.0023844	0.00549004
SEH1L	ENSG00000085415	protein_coding	1847.58	-0.167224	0.0727059	-2.3	0.0214482	0.0389907
WDR47	ENSG00000085433	protein_coding	348.747	0.133423	0.0630858	2.11494	0.0344348	0.0590942
WDFY1	ENSG00000085449	protein_coding	2750.84	-0.170249	0.0727271	-2.34093	0.0192358	0.0354421
OVGP1	ENSG00000085465	protein_coding	210.334	-0.606509	0.10441	-5.80891	6.28825e-09	4.27434e-08
SLC25A24	ENSG00000085491	protein_coding	2523.31	-0.282726	0.0871582	-3.24383	0.00117934	0.00291488
MAP3K4	ENSG00000085511	protein_coding	1015.57	-0.0808099	0.0510036	-1.5844	0.113104	0.166441
PILRA	ENSG00000085514	protein_coding	191.455	1.90769	0.140101	13.6165	3.19557e-42	7.25776e-40
IGSF9	ENSG00000085552	protein_coding	779.831	-0.137815	0.141059	-0.977005	0.328567	0.407999
ABCB1	ENSG00000085563	protein_coding	1345.89	0.0954794	0.203018	0.470299	0.638141	0.703249
ZNF213	ENSG00000085644	protein_coding	897.068	0.267615	0.105651	2.53302	0.0113086	0.0220845
AKR1B1	ENSG00000085662	protein_coding	928.924	0.886929	0.140718	6.30288	2.92168e-10	2.51954e-09
CPNE3	ENSG00000085719	protein_coding	4788.18	-0.353054	0.0765841	-4.61001	4.02647e-06	1.63603e-05
RRN3	ENSG00000085721	protein_coding	1844.6	-0.246601	0.0582628	-4.23257	2.31039e-05	8.13406e-05
CTTN	ENSG00000085733	protein_coding	9215.84	0.0836484	0.0619832	1.34953	0.177166	0.243248
WNT11	ENSG00000085741	protein_coding	747.303	-0.207717	0.252443	-0.822826	0.410607	0.490559
MTIF2	ENSG00000085760	protein_coding	1816.04	-0.364024	0.0531602	-6.84767	7.50639e-12	8.57082e-11
DDHD2	ENSG00000085788	protein_coding	1060.91	-0.1161	0.0844796	-1.3743	0.16935	0.234243
TTC39A	ENSG00000085831	protein_coding	1878.15	-0.583889	0.117847	-4.95464	7.24626e-07	3.39078e-06
EPS15	ENSG00000085832	protein_coding	2070.01	-0.255028	0.0716753	-3.5581	0.000373543	0.0010272
ORC1	ENSG00000085840	protein_coding	581.708	0.0155834	0.0973065	0.160147	0.872765	0.902344
MGST2	ENSG00000085871	protein_coding	2232.85	-0.553225	0.0800038	-6.91498	4.67914e-12	5.54727e-11
CHERP	ENSG00000085872	protein_coding	2118.35	0.165934	0.0741895	2.23662	0.0253113	0.0451377
ATG16L1	ENSG00000085978	protein_coding	1703.95	-0.211533	0.0503806	-4.1987	2.68447e-05	9.32767e-05
USP40	ENSG00000085982	protein_coding	1588.76	-0.247781	0.057658	-4.29743	1.72787e-05	6.23177e-05
POMGNT1	ENSG00000085998	protein_coding	2404.94	-0.148308	0.0660657	-2.24486	0.0247773	0.0442932
RAD54L	ENSG00000085999	protein_coding	481.464	-0.00416425	0.0850729	-0.0489492	0.96096	0.970663
MAST2	ENSG00000086015	protein_coding	3090.8	0.133714	0.0756286	1.76804	0.0770546	0.119369
DNAJA1	ENSG00000086061	protein_coding	7030.27	0.083843	0.0611501	1.3711	0.170343	0.235374
B4GALT1	ENSG00000086062	protein_coding	5317.74	0.204142	0.0692561	2.94764	0.00320211	0.00715499
CHMP5	ENSG00000086065	protein_coding	2769.17	-0.292223	0.0698133	-4.18578	2.84184e-05	9.82627e-05
NFX1	ENSG00000086102	protein_coding	1817.99	-0.113086	0.0458846	-2.46456	0.013718	0.0262056
AQP6	ENSG00000086159	protein_coding	19.4527	-0.377705	0.196548	-1.92169	0.0546447	0.0883166
DIMT1	ENSG00000086189	protein_coding	1317.62	-0.465386	0.0649666	-7.16347	7.86607e-13	1.06383e-11
IPO11	ENSG00000086200	protein_coding	1003.05	-0.254947	0.0721015	-3.53594	0.00040632	0.00111025
FOLH1	ENSG00000086205	protein_coding	55.4546	0.56656	0.138191	4.09984	4.13436e-05	0.000138641
EIF2AK1	ENSG00000086232	protein_coding	8060.55	-0.245382	0.0629514	-3.89796	9.70067e-05	0.000301563
NME8	ENSG00000086288	protein_coding	5.39583	0.537177	0.222178	2.41778	0.0156157	0.0294181
EPDR1	ENSG00000086289	protein_coding	1175.92	-0.367462	0.141577	-2.59549	0.00944548	0.0187947
SNX10	ENSG00000086300	protein_coding	533.242	0.268877	0.138564	1.94045	0.0523245	0.085123
SEPHS1	ENSG00000086475	protein_coding	2288.9	-0.230423	0.0577626	-3.98913	6.63164e-05	0.000213527
MRPL28	ENSG00000086504	protein_coding	1958.48	0.0374682	0.102293	0.366282	0.714155	0.769911
HBQ1	ENSG00000086506	protein_coding	5.97883	-0.202347	0.332076	-0.60934	0.542299	0.616807
ITPKC	ENSG00000086544	protein_coding	1439.47	0.0452486	0.0758247	0.596752	0.550673	0.624443
CEACAM6	ENSG00000086548	protein_coding	44518.4	-0.14909	0.170958	-0.872087	0.383161	0.463976
FAT2	ENSG00000086570	protein_coding	20.0881	0.162134	0.184261	0.879917	0.378904	0.459621
RBM22	ENSG00000086589	protein_coding	1807.01	-0.087181	0.0433804	-2.00969	0.0444644	0.0738541
TMED2	ENSG00000086598	protein_coding	12854.7	-0.351551	0.0785542	-4.47527	7.63163e-06	2.94484e-05
ERO1B	ENSG00000086619	protein_coding	232.705	-0.281146	0.162329	-1.73194	0.0832836	0.127563
ZFAND6	ENSG00000086666	protein_coding	2001.79	-0.361085	0.0626382	-5.76462	8.18434e-09	5.44537e-08
HSD17B2	ENSG00000086696	protein_coding	574.1	0.135245	0.226308	0.597615	0.550097	0.623926
TXLNG	ENSG00000086712	protein_coding	1492.23	-0.433699	0.0824812	-5.25815	1.4551e-07	7.73943e-07
PPEF1	ENSG00000086717	protein_coding	16.1781	0.624691	0.170758	3.65834	0.000253852	0.000723781
LAT2	ENSG00000086730	protein_coding	332.674	0.933228	0.105798	8.82089	1.13556e-18	3.59509e-17
HUWE1	ENSG00000086758	protein_coding	10990.1	-0.0180437	0.0772704	-0.233514	0.815362	0.855443
ZW10	ENSG00000086827	protein_coding	862.94	-0.140723	0.0530854	-2.65088	0.00802826	0.0162778
ALG9	ENSG00000086848	protein_coding	287.238	-0.346891	0.0577212	-6.00976	1.85801e-09	1.39251e-08
MYBPC2	ENSG00000086967	protein_coding	10.6768	1.53517	0.195963	7.83393	4.72838e-15	9.16933e-14
NOX4	ENSG00000086991	protein_coding	110.206	0.967258	0.189255	5.11086	3.20688e-07	1.60305e-06
ACOX3	ENSG00000087008	protein_coding	682.797	0.0482081	0.0634518	0.75976	0.447398	0.526946
MTMR2	ENSG00000087053	protein_coding	1328.51	-0.101269	0.0610905	-1.65769	0.09738	0.146491
PPP1R15A	ENSG00000087074	protein_coding	3010.18	0.100042	0.0953999	1.04866	0.294334	0.37252
HSD17B14	ENSG00000087076	protein_coding	94.7654	1.45457	0.114945	12.6544	1.05751e-36	1.53449e-34
TRIP6	ENSG00000087077	protein_coding	2721.94	-0.0317427	0.148074	-0.21437	0.830258	0.867955
ACHE	ENSG00000087085	protein_coding	413.024	0.722051	0.20043	3.6025	0.000315171	0.000880767
FTL	ENSG00000087086	protein_coding	90904.9	-0.0672953	0.0934781	-0.719904	0.471584	0.549767
SRRT	ENSG00000087087	protein_coding	4561.45	0.0577621	0.0639196	0.903668	0.366172	0.446898
BAX	ENSG00000087088	protein_coding	3059.34	-0.0680966	0.0907366	-0.750486	0.452962	0.53223
NLK	ENSG00000087095	protein_coding	859.224	-0.342362	0.063904	-5.35745	8.44055e-08	4.67502e-07
PIGS	ENSG00000087111	protein_coding	2226.78	0.144568	0.0735183	1.96642	0.0492504	0.0807601
ADAMTS2	ENSG00000087116	protein_coding	1964.44	1.93095	0.155206	12.4412	1.56085e-35	2.00086e-33
TMPRSS11E	ENSG00000087128	protein_coding	10.8577	-1.36787	0.434101	-3.15105	0.00162684	0.00389401
ATXN7L3	ENSG00000087152	protein_coding	2658.19	0.102716	0.059817	1.71718	0.0859467	0.131214
PGS1	ENSG00000087157	protein_coding	916.383	0.0596234	0.0660568	0.902607	0.366735	0.447404
PSMC5	ENSG00000087191	protein_coding	3962.22	-0.0103247	0.074045	-0.139438	0.889104	0.915169
UIMC1	ENSG00000087206	protein_coding	832.502	-0.19748	0.042276	-4.67121	2.99426e-06	1.25068e-05
CETP	ENSG00000087237	protein_coding	39.498	0.894258	0.121921	7.33472	2.22188e-13	3.30671e-12
MMP2	ENSG00000087245	protein_coding	10560.5	1.99691	0.151507	13.1804	1.13859e-39	2.10532e-37
MT3	ENSG00000087250	protein_coding	77.6706	-1.44158	0.315905	-4.56333	5.03477e-06	2.01035e-05
LPCAT2	ENSG00000087253	protein_coding	1519.62	-0.501329	0.107588	-4.65972	3.16633e-06	1.31689e-05
GNAO1	ENSG00000087258	protein_coding	146.984	1.72438	0.196586	8.77164	1.7608e-18	5.47279e-17
OGFOD1	ENSG00000087263	protein_coding	1516.66	-0.139841	0.0395222	-3.53829	0.000402728	0.00110108
SH3BP2	ENSG00000087266	protein_coding	2244.75	0.114808	0.0637366	1.80128	0.0716586	0.111986
NOP14	ENSG00000087269	protein_coding	2627.62	-0.0855172	0.0580407	-1.4734	0.140643	0.200216
ADD1	ENSG00000087274	protein_coding	6101.49	0.300673	0.0395527	7.60185	2.91934e-14	5.02055e-13
L2HGDH	ENSG00000087299	protein_coding	538.625	-0.284479	0.0822574	-3.4584	0.000543393	0.00144639
TXNDC16	ENSG00000087301	protein_coding	501.411	-0.337446	0.0879294	-3.83769	0.000124195	0.000377105
RTRAF	ENSG00000087302	protein_coding	4219.49	-0.324163	0.0607856	-5.33288	9.6666e-08	5.30837e-07
NID2	ENSG00000087303	protein_coding	728.22	1.36797	0.121826	11.2288	2.9437e-29	2.43033e-27
GMCL1	ENSG00000087338	protein_coding	1211.86	-0.35816	0.0579224	-6.18344	6.27176e-10	5.08926e-09
SF3B2	ENSG00000087365	protein_coding	7743.75	0.0712857	0.0516275	1.38077	0.16735	0.231912
KLHL42	ENSG00000087448	protein_coding	1235.61	-0.44615	0.0879532	-5.07259	3.92445e-07	1.93035e-06
GNAS	ENSG00000087460	protein_coding	32185.3	-0.0128618	0.0886473	-0.14509	0.88464	0.911579
DNM1L	ENSG00000087470	protein_coding	2638.2	-0.353496	0.0645843	-5.4734	4.4148e-08	2.56563e-07
PTHLH	ENSG00000087494	protein_coding	61.0871	1.73358	0.171418	10.1131	4.83072e-24	2.58815e-22
PHACTR3	ENSG00000087495	protein_coding	92.0778	-0.0772918	0.234106	-0.330157	0.741282	0.79362
ERGIC2	ENSG00000087502	protein_coding	1435.31	-0.505996	0.0683082	-7.40755	1.28655e-13	1.99351e-12
TFAP2C	ENSG00000087510	protein_coding	146.86	0.0228229	0.203563	0.112117	0.910731	0.931961
AURKA	ENSG00000087586	protein_coding	1871.16	-0.385804	0.0858089	-4.49609	6.92148e-06	2.69344e-05
CASS4	ENSG00000087589	protein_coding	69.8911	1.12686	0.162058	6.95344	3.56491e-12	4.31444e-11
PIR	ENSG00000087842	protein_coding	417.347	-0.471853	0.106882	-4.41473	1.01138e-05	3.81081e-05
AAMDC	ENSG00000087884	protein_coding	381.308	-0.162038	0.0781361	-2.07379	0.0380988	0.0645666
RFX2	ENSG00000087903	protein_coding	267.57	0.241669	0.10386	2.32686	0.0199725	0.0366317
METTL2A	ENSG00000087995	protein_coding	737.856	-0.344495	0.0594052	-5.79906	6.6686e-09	4.50867e-08
SULT2B1	ENSG00000088002	protein_coding	934.222	-0.472266	0.168091	-2.80959	0.00496048	0.0105678
ALG6	ENSG00000088035	protein_coding	581.064	-0.435606	0.0731329	-5.95637	2.57905e-09	1.88424e-08
CNOT3	ENSG00000088038	protein_coding	1878.83	0.220438	0.0810468	2.71988	0.00653049	0.0135318
GP6	ENSG00000088053	protein_coding	10.8976	-0.48953	0.20216	-2.4215	0.0154564	0.0291561
PTPN4	ENSG00000088179	protein_coding	680.277	-0.641539	0.0919844	-6.97443	3.07114e-12	3.75712e-11
DDX18	ENSG00000088205	protein_coding	4266.59	-0.280305	0.0625548	-4.48095	7.4312e-06	2.87466e-05
KHSRP	ENSG00000088247	protein_coding	8584.6	0.077928	0.064736	1.20378	0.228674	0.301965
GNA11	ENSG00000088256	protein_coding	4251.5	0.203407	0.0843411	2.41172	0.0158773	0.0298598
ASAP3	ENSG00000088280	protein_coding	445.157	0.485488	0.117824	4.12046	3.78115e-05	0.000127719
EDEM2	ENSG00000088298	protein_coding	1735.84	-0.0545947	0.0763338	-0.71521	0.474479	0.552587
DNMT3B	ENSG00000088305	protein_coding	243.027	-0.212369	0.10841	-1.95893	0.0501204	0.0819874
REM1	ENSG00000088320	protein_coding	29.7805	1.57203	0.125617	12.5144	6.22662e-36	8.26065e-34
TPX2	ENSG00000088325	protein_coding	4672.36	-0.364846	0.0823275	-4.43165	9.35149e-06	3.54627e-05
FER1L4	ENSG00000088340	transcribed_unitary_pseudogene	678.62	-0.210647	0.199356	-1.05664	0.290677	0.368752
PDRG1	ENSG00000088356	protein_coding	1344.47	-0.335096	0.108976	-3.07494	0.00210544	0.00491461
EPB41L1	ENSG00000088367	protein_coding	3150.85	-0.192316	0.109964	-1.7489	0.0803079	0.123594
SLC15A1	ENSG00000088386	protein_coding	140.609	-0.615849	0.291543	-2.11238	0.0346541	0.0594302
DOCK9	ENSG00000088387	protein_coding	2406	-0.0664032	0.0881544	-0.75326	0.451294	0.530762
ANKRD10	ENSG00000088448	protein_coding	3995.05	-0.630638	0.0888894	-7.09464	1.29693e-12	1.69424e-11
TGDS	ENSG00000088451	protein_coding	859.404	-0.721843	0.089355	-8.07837	6.56371e-16	1.45054e-14
DOCK3	ENSG00000088538	protein_coding	36.6707	0.331508	0.176357	1.87976	0.0601412	0.0960594
C3orf18	ENSG00000088543	protein_coding	103.686	0.560641	0.118106	4.74692	2.0654e-06	8.8845e-06
COQ9	ENSG00000088682	protein_coding	2715.19	-0.188655	0.0717119	-2.63073	0.00852007	0.0171509
TMEM40	ENSG00000088726	protein_coding	10.9657	-0.670488	0.264501	-2.53492	0.0112473	0.021975
KIF9	ENSG00000088727	protein_coding	406.607	-0.374446	0.0742081	-5.04589	4.51404e-07	2.19606e-06
ARHGAP28	ENSG00000088756	protein_coding	68.3404	0.283937	0.171002	1.66042	0.0968292	0.145788
CRLS1	ENSG00000088766	protein_coding	2829.67	-0.519675	0.0907627	-5.72565	1.03039e-08	6.71975e-08
DEFB127	ENSG00000088782	protein_coding	0.00676629	-0.0498164	2.89736	-0.0171938	0.986282
PPP1R13B	ENSG00000088808	protein_coding	1302.05	0.0237886	0.0662587	0.359027	0.719575	0.774548
ATRN	ENSG00000088812	protein_coding	1710.72	0.0513775	0.106375	0.482987	0.629105	0.695492
SMOX	ENSG00000088826	protein_coding	883.075	0.047992	0.110207	0.435472	0.66322	0.725112
SIGLEC1	ENSG00000088827	protein_coding	343.166	2.39066	0.156037	15.3211	5.52643e-53	2.59494e-50
FKBP1A	ENSG00000088832	protein_coding	6307.39	0.0935268	0.0764886	1.22276	0.221422	0.293996
NSFL1C	ENSG00000088833	protein_coding	2781.84	0.068688	0.0724176	0.9485	0.342875	0.423089
SLC4A11	ENSG00000088836	protein_coding	310.817	0.46119	0.200027	2.30564	0.0211309	0.0384976
C20orf194	ENSG00000088854	protein_coding	206.824	1.04783	0.151385	6.92161	4.46544e-12	5.31352e-11
ZNF343	ENSG00000088876	protein_coding	446.354	-0.199086	0.0816737	-2.43758	0.014786	0.0280193
EBF4	ENSG00000088881	protein_coding	176.032	1.31926	0.140716	9.37537	6.89336e-21	2.71768e-19
CPXM1	ENSG00000088882	protein_coding	579.294	1.72944	0.133988	12.9074	4.08765e-38	6.67277e-36
MAVS	ENSG00000088888	protein_coding	4933.46	-0.102083	0.0845029	-1.20805	0.227029	0.300258
LZTS3	ENSG00000088899	protein_coding	1416.17	-0.144628	0.142898	-1.0121	0.311489	0.390459
F11	ENSG00000088926	protein_coding	3.8662	-1.56888	0.367371	-4.27057	1.94975e-05	6.97238e-05
XRN2	ENSG00000088930	protein_coding	4382.75	-0.160007	0.076783	-2.08389	0.0371705	0.0631675
KIZ	ENSG00000088970	protein_coding	712.855	-0.123627	0.115212	-1.07304	0.283255	0.360891
DYNLL1	ENSG00000088986	protein_coding	6397.61	-0.200837	0.0533886	-3.76179	0.000168699	0.00049897
TESC	ENSG00000088992	protein_coding	2088.02	-0.6982	0.192556	-3.62597	0.000287884	0.000810746
SNX5	ENSG00000089006	protein_coding	4827.42	-0.354217	0.078795	-4.49542	6.94327e-06	2.70041e-05
RPL6	ENSG00000089009	protein_coding	24533.1	-0.530704	0.0778859	-6.81387	9.50085e-12	1.06445e-10
SIRPG	ENSG00000089012	protein_coding	78.0544	2.39458	0.142889	16.7583	4.92161e-63	5.41248e-60
MAPKAPK5	ENSG00000089022	protein_coding	2042.21	-0.445542	0.0502987	-8.85792	8.1518e-19	2.62049e-17
P2RX7	ENSG00000089041	protein_coding	125.004	1.30076	0.160216	8.11882	4.70744e-16	1.06395e-14
ESF1	ENSG00000089048	protein_coding	860.65	-0.398565	0.10786	-3.69521	0.000219702	0.000635433
RBBP9	ENSG00000089050	protein_coding	964.133	-0.166015	0.0924384	-1.79595	0.0725023	0.113097
ANAPC5	ENSG00000089053	protein_coding	5330.25	-0.200983	0.0537338	-3.74034	0.000183768	0.000539683
SLC23A2	ENSG00000089057	protein_coding	751.951	0.23001	0.088403	2.60183	0.0092727	0.0184967
SLC8B1	ENSG00000089060	protein_coding	1384.65	0.329142	0.0709286	4.64047	3.47623e-06	1.43379e-05
TMEM230	ENSG00000089063	protein_coding	3574.92	-0.313086	0.0812317	-3.85423	0.000116092	0.000354798
DZANK1	ENSG00000089091	protein_coding	113.141	-0.190637	0.117306	-1.62512	0.104138	0.155215
KDM2B	ENSG00000089094	protein_coding	1265.7	0.214104	0.0510486	4.19411	2.73943e-05	9.50283e-05
CFAP61	ENSG00000089101	protein_coding	6.8665	0.206726	0.180138	1.1476	0.251133	0.326261
LHX5	ENSG00000089116	protein_coding	5.65945	0.230453	0.378085	0.609526	0.542176	0.61673
TASP1	ENSG00000089123	protein_coding	494.039	-0.265698	0.0850722	-3.1232	0.00178894	0.00424434
OAS1	ENSG00000089127	protein_coding	3924.88	0.11784	0.111398	1.05783	0.290133	0.368161
GCN1	ENSG00000089154	protein_coding	6437.07	0.14418	0.0649598	2.21953	0.0264505	0.0468853
RPLP0	ENSG00000089157	protein_coding	88991.1	-0.277597	0.103942	-2.6707	0.00756923	0.015449
PXN	ENSG00000089159	protein_coding	5294.25	0.0923086	0.0749934	1.23089	0.218364	0.29057
SIRT4	ENSG00000089163	protein_coding	21.0137	0.0407127	0.11892	0.342355	0.732084	0.785584
RPH3A	ENSG00000089169	protein_coding	3.96765	0.341716	0.249143	1.37157	0.170198	0.235236
KIF16B	ENSG00000089177	protein_coding	1570.69	-0.258784	0.0972285	-2.66161	0.00777679	0.0158247
TRMT6	ENSG00000089195	protein_coding	961.918	-0.289038	0.0855982	-3.37668	0.000733654	0.00189994
CHGB	ENSG00000089199	protein_coding	52.4737	1.96243	0.250093	7.84681	4.26749e-15	8.31027e-14
PEBP1	ENSG00000089220	protein_coding	10114.7	-0.199446	0.0736021	-2.70979	0.00673259	0.0139002
TBX5	ENSG00000089225	protein_coding	3.05942	0.232071	0.48162	0.481855	0.629909	0.696012
BRAP	ENSG00000089234	protein_coding	999.694	-0.153463	0.0411935	-3.72541	0.000194996	0.000569811
ERP29	ENSG00000089248	protein_coding	5996.39	-0.135194	0.071541	-1.88974	0.0587925	0.0941712
NOS1	ENSG00000089250	protein_coding	17.0265	0.918541	0.283308	3.2422	0.00118611	0.00293016
FUS	ENSG00000089280	protein_coding	10095.6	0.0449761	0.0676397	0.664936	0.506091	0.582633
IGBP1	ENSG00000089289	protein_coding	3745.91	-0.420421	0.0759626	-5.53458	3.11968e-08	1.86325e-07
FXYD5	ENSG00000089327	protein_coding	4284.14	-0.0307338	0.121527	-0.252896	0.800348	0.84295
ZNF302	ENSG00000089335	protein_coding	548.225	-0.385538	0.0880136	-4.38043	1.18443e-05	4.40602e-05
GRAMD1A	ENSG00000089351	protein_coding	3056.8	-0.109015	0.0959026	-1.13673	0.255653	0.331176
FXYD3	ENSG00000089356	protein_coding	16470.3	-0.321357	0.14318	-2.24443	0.0248049	0.0443369
HEPH	ENSG00000089472	protein_coding	9196.35	-0.242289	0.109494	-2.21281	0.026911	0.0475985
CDIP1	ENSG00000089486	protein_coding	470.548	0.533048	0.148988	3.57778	0.00034652	0.000958949
CMTM1	ENSG00000089505	protein_coding	42.6716	0.181372	0.0904358	2.00553	0.0449061	0.0745018
KCNH4	ENSG00000089558	protein_coding	25.8397	0.759469	0.170842	4.44544	8.7712e-06	3.34534e-05
GANAB	ENSG00000089597	protein_coding	16187.5	0.185869	0.0564742	3.29122	0.000997541	0.00250479
GMIP	ENSG00000089639	protein_coding	1268.53	0.371619	0.0657161	5.65491	1.55927e-08	9.82243e-08
RBM41	ENSG00000089682	protein_coding	470.449	-0.610149	0.106735	-5.7165	1.08741e-08	7.05309e-08
BIRC5	ENSG00000089685	protein_coding	2642.65	-0.349406	0.0965045	-3.62062	0.000293896	0.000826397
LAG3	ENSG00000089692	protein_coding	191.909	2.45818	0.16164	15.2078	3.13931e-52	1.36658e-49
MLF2	ENSG00000089693	protein_coding	7895.32	0.0525606	0.0819198	0.64161	0.521126	0.596948
OTUB2	ENSG00000089723	protein_coding	262.942	-0.219201	0.120427	-1.82019	0.0687299	0.108007
DDX24	ENSG00000089737	protein_coding	4034.62	0.13757	0.0486629	2.827	0.00469869	0.0100727
ZBTB25	ENSG00000089775	protein_coding	452.526	-0.300827	0.0906182	-3.31972	0.000901091	0.00228388
NECAP1	ENSG00000089818	protein_coding	1302.8	-0.17002	0.0592581	-2.86914	0.00411595	0.00894604
ARHGAP4	ENSG00000089820	protein_coding	2351.84	0.262421	0.181827	1.44324	0.148952	0.210202
ANKRD24	ENSG00000089847	protein_coding	43.6265	-0.217834	0.148344	-1.46844	0.141985	0.201836
DHX32	ENSG00000089876	protein_coding	1898.33	-0.312715	0.0642675	-4.86584	1.13973e-06	5.13745e-06
RCOR1	ENSG00000089902	protein_coding	1653.9	0.00989432	0.0697823	0.141788	0.887247	0.913635
GPATCH2L	ENSG00000089916	protein_coding	1167.57	-0.438836	0.104479	-4.20022	2.66658e-05	9.2771e-05
LTBP4	ENSG00000090006	protein_coding	4724.92	0.7536	0.137072	5.49783	3.84494e-08	2.25956e-07
BLVRB	ENSG00000090013	protein_coding	2385.43	0.107949	0.141386	0.763505	0.445162	0.524821
SLC9A1	ENSG00000090020	protein_coding	2341.37	0.333132	0.107153	3.10894	0.00187762	0.00443409
SPTLC1	ENSG00000090054	protein_coding	2357.41	-0.216014	0.0560829	-3.85169	0.000117308	0.000358145
PAPOLA	ENSG00000090060	protein_coding	6917.03	-0.298953	0.0622248	-4.80439	1.5522e-06	6.83742e-06
CCNK	ENSG00000090061	protein_coding	431.387	0.0556601	0.0590669	0.942323	0.346028	0.426425
PCBP4	ENSG00000090097	protein_coding	1017.75	-0.115894	0.103265	-1.1223	0.261734	0.337787
RGS1	ENSG00000090104	protein_coding	1271.03	0.935066	0.174507	5.35834	8.39905e-08	4.65327e-07
YPEL3	ENSG00000090238	protein_coding	1020	0.486043	0.122124	3.97993	6.89349e-05	0.000221123
MRPS33	ENSG00000090263	protein_coding	1787.42	-0.691043	0.0770174	-8.97256	2.89707e-19	9.74003e-18
NDUFB2	ENSG00000090266	protein_coding	3181.52	-0.459391	0.07649	-6.0059	1.90277e-09	1.42172e-08
NUDC	ENSG00000090273	protein_coding	4302.36	-0.0142756	0.0813764	-0.175427	0.860744	0.892603
MAEA	ENSG00000090316	protein_coding	3008.24	0.149849	0.0769894	1.94635	0.0516123	0.084092
ICAM1	ENSG00000090339	protein_coding	1646.39	1.45959	0.117964	12.3732	3.64944e-35	4.51214e-33
STRN4	ENSG00000090372	protein_coding	3947.32	0.106633	0.0748907	1.42385	0.15449	0.216663
IRAK3	ENSG00000090376	protein_coding	299.438	0.440565	0.180546	2.44018	0.0146798	0.0278419
LYZ	ENSG00000090382	protein_coding	21814.7	-0.00679887	0.23368	-0.0290948	0.976789	0.982275
SI	ENSG00000090402	protein_coding	403.623	0.422141	0.302449	1.39574	0.162792	0.226686
MUL1	ENSG00000090432	protein_coding	1162.98	0.251949	0.0627061	4.01793	5.87111e-05	0.000191105
TFAP4	ENSG00000090447	protein_coding	1063.49	-0.16294	0.0725989	-2.24439	0.0248075	0.0443396
PDCD7	ENSG00000090470	protein_coding	790.053	-0.110612	0.0486977	-2.27141	0.0231222	0.0416912
SPG21	ENSG00000090487	protein_coding	3451.81	-0.203783	0.0514406	-3.96152	7.44746e-05	0.000237003
FETUB	ENSG00000090512	protein_coding	1.13243	-1.2672	0.514386	-2.46351	0.0137582	0.0262705
DNAJB11	ENSG00000090520	protein_coding	2861.04	-0.0905424	0.0537698	-1.68389	0.0922033	0.139607
P3H2	ENSG00000090530	protein_coding	433.495	0.14254	0.177222	0.804301	0.421223	0.501293
THPO	ENSG00000090534	protein_coding	6.30269	1.47451	0.185773	7.93713	2.06908e-15	4.23649e-14
CHRD	ENSG00000090539	protein_coding	149.432	1.62114	0.131342	12.3429	5.31879e-35	6.49919e-33
FLT3LG	ENSG00000090554	protein_coding	35.7717	1.05571	0.103232	10.2266	1.50787e-24	8.48103e-23
RAB11FIP3	ENSG00000090565	protein_coding	1790.71	0.310133	0.0870779	3.56156	0.000368664	0.00101519
GNPTG	ENSG00000090581	protein_coding	1699.43	0.140262	0.0761913	1.84091	0.0656343	0.103755
ZNF268	ENSG00000090612	protein_coding	559.774	-0.511561	0.0984461	-5.19635	2.03237e-07	1.05219e-06
GOLGA3	ENSG00000090615	protein_coding	3871.09	-0.027582	0.0681031	-0.405004	0.685475	0.744835
PABPC4	ENSG00000090621	protein_coding	6036.97	-0.204677	0.0596955	-3.42869	0.000606499	0.00159718
CD209	ENSG00000090659	protein_coding	253.402	1.94198	0.167531	11.5918	4.53594e-31	4.24065e-29
CERS4	ENSG00000090661	protein_coding	219.63	-0.0093513	0.19591	-0.0477325	0.961929	0.971321
MCOLN1	ENSG00000090674	protein_coding	656.239	0.590184	0.0927629	6.36229	1.9877e-10	1.76174e-09
USP48	ENSG00000090686	protein_coding	1820.78	-0.0557725	0.0570186	-0.978147	0.328002	0.407443
EFNB1	ENSG00000090776	protein_coding	5083.52	-0.117746	0.0983705	-1.19697	0.231319	0.304831
PDPR	ENSG00000090857	protein_coding	1480.21	0.112912	0.0857366	1.31696	0.187851	0.25556
AARS1	ENSG00000090861	protein_coding	6143.69	-0.171201	0.0670509	-2.55329	0.010671	0.0209746
GLG1	ENSG00000090863	protein_coding	8191.19	0.0550207	0.054309	1.0131	0.31101	0.389901
KIF4A	ENSG00000090889	protein_coding	1323.64	-0.172006	0.0790021	-2.17723	0.0294634	0.0515632
TNRC6A	ENSG00000090905	protein_coding	1477.41	-0.116456	0.0786104	-1.48143	0.138492	0.197779
PLEKHG2	ENSG00000090924	protein_coding	747.774	1.04176	0.0972995	10.7067	9.46801e-27	6.36122e-25
DLL3	ENSG00000090932	protein_coding	19.5019	0.212336	0.25475	0.833505	0.40456	0.484595
NAT14	ENSG00000090971	protein_coding	296.056	0.229225	0.128188	1.7882	0.073744	0.114781
PITPNM2	ENSG00000090975	protein_coding	649.92	0.398864	0.0876954	4.54829	5.40837e-06	2.14681e-05
EXOC1	ENSG00000090989	protein_coding	1655.29	-0.390432	0.0602904	-6.47586	9.42756e-11	8.85741e-10
RBM27	ENSG00000091009	protein_coding	916.523	-0.515043	0.0762093	-6.75827	1.39651e-11	1.5194e-10
POU4F3	ENSG00000091010	protein_coding	1.23181	0.709418	0.22071	3.21426	0.00130783	0.00319839
OSBPL8	ENSG00000091039	protein_coding	2107.4	-0.468177	0.120658	-3.8802	0.000104372	0.000322324
DTX2	ENSG00000091073	protein_coding	2130.89	0.01054	0.0938623	0.112292	0.910592	0.931888
NLRC4	ENSG00000091106	protein_coding	62.8581	0.758125	0.13163	5.75951	8.43576e-09	5.5975e-08
PUS7	ENSG00000091127	protein_coding	1231.89	-0.498358	0.0729327	-6.83312	8.30884e-12	9.39719e-11
LAMB4	ENSG00000091128	protein_coding	5.11439	0.198566	0.182709	1.08679	0.277132	0.35431
NRCAM	ENSG00000091129	protein_coding	172.131	0.374622	0.211207	1.77372	0.0761096	0.118098
LAMB1	ENSG00000091136	protein_coding	7291.27	0.153514	0.09624	1.59512	0.110686	0.163459
SLC26A4	ENSG00000091137	protein_coding	14.1056	0.0754319	0.161359	0.467478	0.640158	0.704821
SLC26A3	ENSG00000091138	protein_coding	5156.44	0.257771	0.303268	0.849977	0.395338	0.475703
DLD	ENSG00000091140	protein_coding	3953.05	-0.294527	0.05954	-4.94671	7.5477e-07	3.51519e-06
WDR7	ENSG00000091157	protein_coding	497.717	0.243795	0.095782	2.54531	0.0109181	0.0214191
TXNL1	ENSG00000091164	protein_coding	2151.04	-0.180475	0.0673692	-2.67889	0.00738663	0.0151199
IL5RA	ENSG00000091181	protein_coding	9.13956	1.31513	0.232435	5.65804	1.53116e-08	9.66573e-08
ABCC6	ENSG00000091262	protein_coding	368.323	-0.0588472	0.142598	-0.412679	0.679842	0.739705
CMTM6	ENSG00000091317	protein_coding	4859.97	-0.212418	0.0708078	-2.99992	0.00270049	0.0061457
ITGA6	ENSG00000091409	protein_coding	15521.8	-0.486118	0.0838573	-5.79696	6.75263e-09	4.56179e-08
RAPGEF4	ENSG00000091428	protein_coding	150.061	-0.372823	0.136674	-2.72783	0.00637524	0.0132383
MAP3K20	ENSG00000091436	protein_coding	3620.09	-0.294618	0.100532	-2.93058	0.00338328	0.00751261
SMPX	ENSG00000091482	protein_coding	31.319	-0.801458	0.367897	-2.17849	0.0293699	0.0514231
FH	ENSG00000091483	protein_coding	3263.37	-0.311787	0.0719435	-4.33377	1.46577e-05	5.36472e-05
SEL1L3	ENSG00000091490	protein_coding	7654.74	-0.313603	0.0584693	-5.36355	8.1603e-08	4.53242e-07
TF	ENSG00000091513	protein_coding	31.2558	0.182042	0.266503	0.68308	0.494557	0.571636
CDV3	ENSG00000091527	protein_coding	6401.78	-0.167783	0.0558456	-3.00441	0.00266098	0.00606431
MYO15A	ENSG00000091536	protein_coding	23.5474	0.0245012	0.147133	0.166523	0.867745	0.898334
ALKBH5	ENSG00000091542	protein_coding	2441.15	0.278784	0.0592242	4.70727	2.51056e-06	1.0632e-05
APOH	ENSG00000091583	protein_coding	16.7512	-0.811632	0.243668	-3.33089	0.000865701	0.00220421
NLRP1	ENSG00000091592	protein_coding	459.732	1.53585	0.14007	10.9649	5.63473e-28	4.1677e-26
PITPNM3	ENSG00000091622	protein_coding	539.37	0.0634106	0.142148	0.446088	0.655533	0.718438
SPAG7	ENSG00000091640	protein_coding	1121.93	-0.0173242	0.0839541	-0.206354	0.836515	0.872814
ORC6	ENSG00000091651	protein_coding	603.313	-0.432484	0.0848949	-5.09434	3.49953e-07	1.73605e-06
ZFHX4	ENSG00000091656	protein_coding	110.771	0.692822	0.247608	2.79806	0.00514102	0.0109224
SLC17A6	ENSG00000091664	protein_coding	0.0994101	-0.46445	1.66874	-0.278324	0.780763
CPA1	ENSG00000091704	protein_coding	1.11234	0.983348	0.479682	2.05	0.0403642	0.0678791
ZC3HC1	ENSG00000091732	protein_coding	518.484	-0.24901	0.0540366	-4.60816	4.06242e-06	1.65e-05
ESR1	ENSG00000091831	protein_coding	35.8272	0.456465	0.205792	2.2181	0.0265483	0.0470387
RGS17	ENSG00000091844	protein_coding	58.2241	-0.660549	0.16488	-4.00625	6.16912e-05	0.000200012
ANGPT2	ENSG00000091879	protein_coding	321.818	0.00804966	0.12357	0.0651425	0.948061	0.960774
TMEM101	ENSG00000091947	protein_coding	1378.19	-0.19997	0.089676	-2.22992	0.0257531	0.0458317
CD200	ENSG00000091972	protein_coding	376.264	0.462916	0.15031	3.07973	0.00207186	0.00484435
CCDC80	ENSG00000091986	protein_coding	2047.36	1.89381	0.192983	9.81335	9.86387e-23	4.69489e-21
CMA1	ENSG00000092009	protein_coding	10.1557	2.9247	0.288797	10.1272	4.18462e-24	2.24776e-22
PSME1	ENSG00000092010	protein_coding	8222.78	0.275936	0.0968191	2.85001	0.00437175	0.00943969
PPP2R3C	ENSG00000092020	protein_coding	627.56	-0.134551	0.073373	-1.8338	0.0666838	0.105183
HAUS4	ENSG00000092036	protein_coding	828.243	-0.232068	0.0739744	-3.13714	0.00170603	0.00406401
JPH4	ENSG00000092051	protein_coding	11.3365	1.48146	0.1569	9.44207	3.65475e-21	1.49298e-19
MYH7	ENSG00000092054	protein_coding	3.7056	0.276969	0.219289	1.26303	0.206578	0.277167
CEBPE	ENSG00000092067	protein_coding	9.74318	1.7977	0.253765	7.08413	1.39922e-12	1.81707e-11
SLC7A8	ENSG00000092068	protein_coding	2047.21	0.192667	0.148658	1.29604	0.194963	0.263802
OSGEP	ENSG00000092094	protein_coding	1197.41	-0.151136	0.0697462	-2.16694	0.0302397	0.0527274
SLC22A17	ENSG00000092096	protein_coding	177.572	1.31143	0.137113	9.56456	1.12681e-21	4.79526e-20
RNF31	ENSG00000092098	protein_coding	644.749	0.483092	0.0636256	7.59273	3.1324e-14	5.37149e-13
SCFD1	ENSG00000092108	protein_coding	1549.03	-0.276573	0.0688144	-4.01912	5.84162e-05	0.000190244
G2E3	ENSG00000092140	protein_coding	758.692	-0.57316	0.0990854	-5.7845	7.27272e-09	4.88236e-08
HECTD1	ENSG00000092148	protein_coding	4031.07	-0.229586	0.0790424	-2.90459	0.00367734	0.00809119
HNRNPC	ENSG00000092199	protein_coding	12836.5	-0.241535	0.0564485	-4.27887	1.87848e-05	6.7378e-05
RPGRIP1	ENSG00000092200	protein_coding	13.5703	-0.0426267	0.11489	-0.371022	0.710622	0.767143
SUPT16H	ENSG00000092201	protein_coding	5031.51	0.00651293	0.0616541	0.105637	0.915871	0.935617
TOX4	ENSG00000092203	protein_coding	2247.43	0.131621	0.0417562	3.15213	0.00162082	0.0038816
GEMIN2	ENSG00000092208	protein_coding	301.544	-0.282503	0.0744569	-3.79418	0.000148133	0.000443126
TGM1	ENSG00000092295	protein_coding	31.0182	0.299586	0.126091	2.37595	0.017504	0.032592
TINF2	ENSG00000092330	protein_coding	1296.53	0.282063	0.061163	4.61165	3.99483e-06	1.62413e-05
DAZL	ENSG00000092345	protein_coding	3.68924	1.47572	0.267068	5.52565	3.28275e-08	1.95199e-07
TBL1Y	ENSG00000092377	protein_coding	2.97539	-0.625161	0.597397	-1.04648	0.295342	0.37341
SEMA6A	ENSG00000092421	protein_coding	804.742	0.29134	0.167098	1.74353	0.0812417	0.124901
TRPM7	ENSG00000092439	protein_coding	1518.72	-0.413459	0.0832605	-4.96585	6.84e-07	3.2157e-06
TYRO3	ENSG00000092445	protein_coding	582.947	-0.263963	0.139831	-1.88773	0.0590627	0.0945283
WDR76	ENSG00000092470	protein_coding	534.294	-0.0562242	0.0900034	-0.62469	0.532175	0.607146
CAPN3	ENSG00000092529	protein_coding	36.2843	-0.218646	0.154716	-1.41321	0.157595	0.220345
SNAP23	ENSG00000092531	protein_coding	1758.46	-0.154255	0.0656649	-2.34913	0.0188175	0.0347511
TBX15	ENSG00000092607	protein_coding	34.5908	-0.28334	0.206591	-1.3715	0.170218	0.235255
PHGDH	ENSG00000092621	protein_coding	2327.57	-0.879586	0.187192	-4.69884	2.61641e-06	1.10478e-05
COL9A3	ENSG00000092758	protein_coding	1110.36	-1.70575	0.240411	-7.09514	1.29218e-12	1.68856e-11
EZR	ENSG00000092820	protein_coding	16642.4	0.0466985	0.081291	0.574461	0.565656	0.638092
MYL6	ENSG00000092841	protein_coding	27212	-0.0509532	0.0848279	-0.600665	0.548063	0.622126
AGO1	ENSG00000092847	protein_coding	1327.71	0.175752	0.0668618	2.62859	0.00857401	0.0172479
TEKT2	ENSG00000092850	protein_coding	3.55691	0.741837	0.224604	3.30287	0.000957022	0.00241363
CLSPN	ENSG00000092853	protein_coding	340.263	0.157446	0.104228	1.51059	0.130894	0.18857
RFFL	ENSG00000092871	protein_coding	1350.84	-0.0396788	0.0580058	-0.68405	0.493944	0.571071
UNC13D	ENSG00000092929	protein_coding	1481.43	0.450285	0.165929	2.71372	0.00665319	0.0137567
MFSD11	ENSG00000092931	protein_coding	729.91	-0.0528606	0.0563363	-0.938306	0.348087	0.428462
DPYSL2	ENSG00000092964	protein_coding	3443.79	0.143345	0.122683	1.16842	0.242638	0.317029
TGFB2	ENSG00000092969	protein_coding	108.428	0.427187	0.166135	2.57133	0.010131	0.0200243
GPATCH2	ENSG00000092978	protein_coding	598.061	-0.518394	0.076203	-6.8028	1.02605e-11	1.14221e-10
NUP50	ENSG00000093000	protein_coding	2229.25	-0.140467	0.0691897	-2.03017	0.0423394	0.0707831
CDC45	ENSG00000093009	protein_coding	818.327	-0.0914038	0.103348	-0.884428	0.376465	0.457087
COMT	ENSG00000093010	protein_coding	5462.92	0.0501975	0.131512	0.381694	0.702688	0.759953
ADA2	ENSG00000093072	protein_coding	1130.47	1.9481	0.13958	13.9568	2.86003e-44	7.28319e-42
AC016026.1	ENSG00000093100	lncRNA	5.49694	-1.47833	0.238067	-6.2097	5.30853e-10	4.3722e-09
VNN3	ENSG00000093134	protein_coding	16.0104	0.512704	0.246517	2.07979	0.0375448	0.0637442
ECHDC1	ENSG00000093144	protein_coding	2243.86	-0.262429	0.0699695	-3.75062	0.0001764	0.000520201
LRRFIP2	ENSG00000093167	protein_coding	1703.57	-0.290361	0.0593906	-4.88902	1.0134e-06	4.61405e-06
SEC22C	ENSG00000093183	protein_coding	924.209	0.0652638	0.0560419	1.16455	0.2442	0.3187
[truncated: 54,494 more rows]

## Sheet: Sheet2
616 common elements in "List 1" and "List 2":
gene_name
FGR
MEOX1
ITGAL
PRSS21
CD79B
MMP25
CD4
TYROBP
CD22
WAS
IGF1
MARCO
CD74
TYMP
SLAMF7
CHRDL2
CCN5
SPI1
TBX21
KCNK2
EPYC
FCN1
PILRA
ADAMTS2
MMP2
SIGLEC1
SIRPG
LAG3
CD209
CMA1
ADA2
TPSD1
TREM2
IL12RB1
APOBEC3H
IL2RB
CTSG
GZMH
TCL1A
SLC32A1
PPP1R16B
CHRDL1
CCL22
CCL17
IL21R
SFRP1
NEFM
MAP4K1
CD37
RETN
FCER2
IL4I1
LILRB1
RASAL3
EBI3
SIGLEC8
CD79A
NKG7
HAS1
COMP
HAMP
MEOX2
PTGDS
CCL1
IL10RA
SLC15A3
MGP
RERGL
MDGA1
C7
GZMK
ZAP70
GNLY
CD2
PLA2G2D
CR2
GPR68
TNFRSF8
SASH3
LY9
ARHGAP9
DBH
GTSF1L
WNT1
KIR2DL1
C3
HCST
CCR7
FAM78A
IGLL1
TBC1D27P
SIGLEC9
CDO1
APOE
KLHDC7B
LSP1
GATA5
LILRB2
CCL25
IDO1
NAPSB
FCRLA
CLEC10A
CHIT1
PRAM1
LGALS12
IL2RA
SLC37A2
TESPA1
STX11
MYO1G
BLK
CCL21
CILP
CXCL9
CD27
GPR84
DPEP3
ADCYAP1
SIGLEC10
PROK1
SFRP2
DOK2
INA
SERPING1
DPYSL4
JAKMIP1
CIBAR2
VSIG4
MS4A1
CD1C
CD1B
NCF1
SLAMF8
C1QC
IRX6
UBASH3A
ITGB2
CXCR5
CCR5
FCRL3
HK3
PGLYRP2
CD300LG
GBP4
CADM3
CCKAR
EOMES
FCRL1
IL22RA2
PI16
FNDC1
NCF1C
NIBAN3
KIR3DL1
KRT1
KRT24
PNOC
XIRP1
TNXB
SIGLEC7
RSPO1
CD52
VPREB1
DRD5
ITGAM
NSG2
GPR25
FABP4
MZB1
SIGLEC17P
MAL
GAP43
TPSAB1
CTSW
CCL19
C1QB
C1QA
XCR1
CD7
SELP
ZNF80
CMKLR1
TBC1D10C
LRRC25
PRIMA1
ZNF683
CIDEA
ZBED2
CD163
CIITA
CCR8
HOXC10
FCRL6
ADIPOQ
MUC16
PENK
CCL13
FDCSP
TIGIT
ENPP7
NXPH4
NCF1B
CLEC4G
CSF1R
OTOP3
GBP6
ACSM5
TAFA1
CCR4
PNMA3
SLIT3
TRARG1
TCEAL2
FMNL1
SV2B
PDE6G
KRT5
ARHGAP30
LILRB4
KRT14
TNFRSF18
FOXD3
SLC18A3
TTC24
CLEC17A
RTP5
PDCD1
SELL
CALHM6
FAM180A
ADH1B
FAM180B
TPSB2
GZMM
PRAMENP
SERPINB13
NTRK1
CD3E
CT83
TCEAL5
NCR3
CD177
FOXL2NB
IGKC
IGLJ1
IGLJ2
IGLC2
IGLJ3
IGLC3
IGLJ6
IGLJ7
IGLC7
TRGV10
TRGV3
TRBV9
TRBV19
TRBC1
TRBV27
TRBV28
TRBC2
TRAV2
TRAV3
TRAV4
TRAV5
TRAV6
TRAV14DV4
TRAV16
TRAV17
TRAV19
TRAV20
TRAV21
TRAV22
TRDV1
TRAV24
TRAV39
IGHA2
IGHE
IGHG4
IGHG2
IGHA1
IGHG1
IGHG3
IGHD
IGHM
IGHJ2
IGHJ1
ACKR1
IGLC6
FTH1P22
TRBV2
LTA
LTB
HNRNPA1P21
CXCR2P1
OR2I1P
LILRA4
KIR3DL2
TNFRSF13B
IGHJ3
KIR2DL3
TUNAR
IGHGP
SIGLEC14
IGLL5
TIFAB
TRDV3
SMIM28
MIR4538
MIR4537
MIR4539
CT45A1
CCL5
CCL18
TRBV14
TRBV13
TRBV18
TRBV15
GPIHBP1
TRAC
CSTP2
SSTR3

## Sheet: Sheet1
1362 common elements in "List 1" and "List 2":
gene_name
FGR
CFH
CD38
MEOX1
PRKAR2B
ITGAL
CX3CL1
PRSS21
MATK
CD79B
SELE
CAMK1G
MMP25
MAPK8IP2
TRAF3IP3
SEMA3G
CD4
BTK
DCN
ZBTB32
TYROBP
CD22
CD6
WAS
IGF1
CNTN1
SLC11A1
MARCO
CD74
TYMP
SLAMF7
POU2F2
HOXC8
TLL1
LCP2
CP
TNFRSF17
GUCA1A
TNFRSF9
COL23A1
CHRDL2
SERPINB3
COL11A1
TSPAN32
CCN5
NGFR
SPI1
CLDN18
RASGRP2
SLC12A3
FCGR2B
ACAP1
TBX21
ICAM3
APBB1IP
ADCYAP1R1
P2RY10
ITM2A
SP140
PTPRC
FYB1
KCNK2
EPYC
FCN1
PILRA
ADAMTS2
MMP2
SIGLEC1
SIRPG
P2RX7
LAG3
ICAM1
CD209
IL5RA
NLRP1
CCDC80
CMA1
JPH4
CEBPE
DAZL
ADA2
FMO2
TPSD1
TREM2
IL12RB1
HCN2
DERL3
OSM
SUSD2
CYTH4
APOBEC3H
APOL4
PVALB
CSF2RB
IL2RB
CTSG
GZMH
TCL1A
CD40
SLA2
NTSR1
RASSF2
SIRPB1
HCK
SLC32A1
PPP1R16B
TLR8
CHRDL1
SRPX
CD40LG
TNFSF13B
ACP5
MEDAG
CCL22
CCL17
MEFV
IL21R
PDGFRL
SFRP1
CCN4
NEFM
MAP4K1
TUBB4A
CD37
RETN
FCER2
IL4I1
LILRB1
LILRA1
RASAL3
CLC
EBI3
CEACAM4
SIGLEC8
CD79A
NKG7
CD33
ATP1A3
SIGLEC6
SIGLEC5
HAS1
LILRB5
JAK3
COMP
HAMP
SERPINE1
MEOX2
LHX2
TNFSF8
PTGDS
GATA3
SPOCK2
EBF3
ASPA
CCL7
CCL2
CCL8
CCL1
ABI3
FAM20A
PHOX2B
CRTAM
B3GAT1
MS4A6A
MS4A4A
FOLR3
IL10RA
SLC15A3
C11orf21
POU2AF1
PTPN5
SELPLG
KCNA1
OAS2
MGP
RERGL
IFNG
AICDA
KLRB1
MDGA1
BACH2
C6orf118
LY86
C7
GZMK
ITK
IL12B
GABRG2
HRH2
UNC5A
CD86
ZAP70
EFEMP1
GNLY
WIPF1
VAX2
NCF2
RPE65
AMPD1
CD2
HPCAL4
ST6GALNAC5
SLAMF1
CD48
PLA2G2D
GBP1
CR2
FASLG
TNFSF4
HSD11B1
IRAG2
CNR1
NR4A3
CSF3R
GPR68
ELOVL3
CXorf21
GPR31
KCNJ5
IQSEC3
TNFRSF8
GJB6
ADGRB2
CCR2
TMEM156
TMIGD3
FLT3
SASH3
LAX1
LY9
HS3ST2
PHF24
EGR2
HVCN1
ARHGAP9
NCKAP1L
PDE1B
DBH
PLP1
GTSF1L
ZNF831
PTGIS
IL9R
F13A1
WNT1
KIR2DL1
OPRL1
C3
TNFSF14
PCSK2
HCST
CCR7
TSKS
CFP
FAM78A
ADGRE2
VPREB3
APOL3
MCHR1
IGLL1
APOBEC3A
KRT17
TBC1D27P
WDFY4
AIPL1
SIGLEC9
CDO1
ARHGEF6
APOE
APOC1
BST2
CACNG6
UNC13A
KLHDC7B
OLFM1
LSP1
TNNT3
GATA5
GMFG
THEMIS2
LILRB2
CCL25
NFATC1
IDO1
GALNT15
NAPSB
GFPT2
RTBDN
FCRLA
SERPINF1
JCHAIN
CLEC10A
FCRL2
SYT4
ALOX5AP
CHIT1
POSTN
PRAM1
LGALS12
PLAAT4
GIMAP6
GIMAP4
LYVE1
CD180
SYT6
IL2RA
DOCK2
RAB33A
SLC37A2
HAVCR2
SDS
PRPH
TESPA1
KRT7
STX11
LCP1
GPNMB
MYO1G
CIDEB
TM6SF1
LIMD2
BLK
IL10
SLC31A2
ENPP2
CCL21
SIT1
CD72
IRF4
IL18BP
CYP1B1
CILP
IL21
MMRN1
CXCL9
PARVG
CD27
GPR84
ITGB7
WARS1
HDC
PSTPIP1
HAPLN3
ITGAX
DPEP3
ABCA8
ADCYAP1
PIK3R5
SECTM1
MYO1F
SIGLEC10
SLC2A5
C1orf162
CD53
PROK1
XCL2
DPT
FCRL5
S100A8
SFRP2
ADAMTS16
GZMA
PLA2G7
DOK3
FGD2
SDK1
GPR174
DOK2
DNAJC5B
GSDMC
HTR7
INA
ADAM12
LRRC4C
SERPING1
TENM4
MS4A2
FCGR1A
DPYSL4
FLI1
ZNF385D
GLT1D1
CYSLTR2
KCNK13
RAB3C
JAKMIP1
CD96
CIBAR2
SEMA3D
ROBO3
GPR15
ABI3BP
GBP5
LY96
VSIG4
SLA
RAB39B
CLIC2
CXCL13
GDF6
PPP2R2B
UBE2L6
MS4A1
RADIL
MRAS
COLEC12
CD1C
CD1B
NCF1
SLAMF8
FCER1G
C1QC
IRX6
TNFRSF13C
UBASH3A
ITGB2
S100B
SPTBN4
JAML
CD3G
CXCR5
CCR5
FCRL3
HK3
PGLYRP2
IKZF3
SIGLEC11
ZNF385A
CD300LG
AQP5
KRT84
TREML1
SCIMP
CCDC42
ELAVL4
LAPTM5
ALPL
GBP4
VCAM1
CADM3
FCGR3B
FCMR
TNFAIP8L2
ARHGAP25
CCKAR
EOMES
FCRL4
TRAT1
FCRL1
MNDA
PYHIN1
AIM2
CTLA4
ICOS
DNASE1L3
CPA3
TCF23
CCR1
TMEM155
ANKRD33B
IL22RA2
ANKRD55
PI16
TAGAP
FNDC1
DCSTAMP
TRPV6
CYBB
NCF1C
FOLR2
DRGX
TMEM52B
CMTM5
SERPINB7
PRKCB
CLEC4E
CLEC4D
MC4R
NNMT
GREM1
MS4A14
MEI1
GNGT2
DPEP2
CD3D
NIBAN3
LAIR1
KIR3DL1
NLRP7
KRT1
CD300C
CD300A
KRT24
SOST
NLRC3
SCARA5
PNOC
FAM107A
XIRP1
RHOH
RAB31
TNXB
GFRA2
UGT3A2
IL7R
SIGLEC7
IL13
RSPO1
CXCL10
P2RY12
PTAFR
CD52
SPRR1B
HTRA4
VPREB1
BNC1
DRD5
ITGAM
NSG2
GPR25
FABP4
ZNF804A
CD14
MZB1
KRT72
BFSP2
GPR27
LILRP2
CYTL1
OSCAR
FPR1
SIGLEC17P
GIMAP8
CHST11
KRT27
PIK3CD
PTCRA
RASGRP4
C3AR1
CYP4F22
MAL
GAP43
CALB2
CXCR6
TPSAB1
CLEC7A
IL16
CTSW
KLHL6
CCL19
KRT2
CYSLTR1
C1QB
C1QA
OLR1
SAA1
XCR1
CD7
NRROS
TLR10
SELP
ZNF80
CMKLR1
LEP
ADGRE1
GPR171
CHST2
TBC1D10C
LRRC25
PRIMA1
FAM172BP
GAPT
ZNF683
SPHK1
ENTHD1
CIDEA
BASP1
KCNA3
FBXO39
CD19
ZBED2
CD163
ODF3B
CD28
MAF
CD300LB
ERICH3
GIMAP7
CIITA
ALOX15B
CCR8
SEPTIN1
HCLS1
DEFB124
GAS1
PRF1
HOXC10
BHLHE22
FCRL6
ADIPOQ
MUC16
PENK
CCL13
FDCSP
P2RY13
GPR88
SLC9A9
TIGIT
KCNIP1
ENPP7
P2RY8
SHISAL2A
C1S
NXPH4
NCF1B
CLEC4G
CSF1R
PLCXD3
VMO1
ADGRG3
OTOP3
MCEMP1
OTOP2
CCBE1
GBP6
ACSM5
TAFA1
SLC35F3
CCR4
PNMA3
SH2D1A
TBX1
CLECL1
SLIT3
CSF1
KCND2
C14orf180
TRARG1
TCEAL2
FMNL1
MUC6
NPY2R
MIXL1
TNFAIP2
MAPK11
SV2B
PDE6G
POU3F1
SNAI3
IFIT1
KCNQ5
IKZF1
EVI2B
FFAR3
C16orf54
SLITRK2
CD300LF
KRT5
LILRP1
BTLA
THBS2
CD300E
ARHGAP30
SPATC1
LILRB4
KRT16
KRT14
TNFRSF18
LILRA5
FOXD3
FPR3
TRPV2
SLC18A3
TTC24
CLEC17A
LCN10
COL14A1
DNER
RTP5
RAB42
RUFY4
IGFL1
PDCD1
SELL
HMX3
IDO2
ADRB3
CALHM6
CNR2
KIR2DL4
CGB5
VSTM1
NUGGC
FAM180A
TOGARAM2
NCR1
SIRPB2
EVL
ADH1B
TLR7
FAM180B
SLC6A17
TPSB2
C5AR1
SPN
GZMM
PRAMENP
MFAP5
MYH6
MPEG1
SERPINB13
PDCD1LG2
MAP1LC3C
CYRIA
PLCG2
CLEC9A
FCGR1B
CLEC4C
NTRK1
CCDC69
MAGEA1
APCDD1L
RCSD1
CD247
CD3E
RORB
CR1
FCGR3A
CT83
TCEAL5
TCEAL6
MAFB
GGTA1P
TMEM273
AIF1
NCR3
LST1
LILRB3
MAS1L
CD177
KRT6A
ARRDC5
CLEC6A
FOXL2NB
IGKC
IGKJ5
IGLJ1
IGLJ2
IGLC2
IGLJ3
IGLC3
IGLJ6
IGLJ7
IGLC7
TRGC1
TRGV10
TRGV5
TRGV4
TRGV3
TRBV9
TRBV19
TRBC1
TRBV27
TRBV28
TRBC2
TRAV2
TRAV3
TRAV4
TRAV5
TRAV6
TRAV10
TRAV14DV4
TRAV16
TRAV17
TRAV19
TRAV20
TRAV21
TRAV22
TRAV23DV6
TRDV1
TRAV24
TRAV25
TRAV27
TRAV29DV5
TRAV34
TRAV35
TRAV36DV7
TRAV39
TRAV41
TRDC
IGHA2
IGHE
IGHG4
IGHG2
IGHA1
IGHG1
IGHG3
IGHD
IGHM
IGHJ2
IGHJ1
CGB8
ACKR1
GIMAP1
KRT222
UBD
SEC14L6
MS4A18
APOC1P1
SMTNL1
TENM3
EBF2
KIR2DS4
IGLC6
PRRT4
FTH1P22
HSPA7
GBP1P1
MIAT
NRIR
TRBV2
FAM30A
LTA
TRGC2
LTB
HNRNPA1P21
CXCR2P1
MIR205HG
SPATA20P1
TRGV2
TMEM229A
NFAM1
IGHJ3P
IGHJ2P
OR2I1P
APOBEC3G
LILRA4
LILRA2
KIR3DL2
TNFRSF13B
KIR3DL3
IGHJ3
KIR2DL3
APOBEC3D
PARAL1
PGBD4P1
CFHR1
LILRA6
C4A
TRGV7
TUNAR
NAIPP1
COPDA1
IGHEP1
IGHGP
IGLC5
SIGLEC14
SIGLEC12
IGLL5
TIFAB
TRDV3
MRC1
XKR7
SMIM28
MIR4538
RHEX
MIR4420
MIR4537
ANXA8
FCGR1CP
MIR4539
RASSF5
CLEC4O
FAM215A
CCDC177
SIGLEC18P
SIGLEC22P
PNMA6B
CT45A1
SPIB
CCL5
MILR1
CCL23
CCL4
CCL18
TRBV14
RIMBP3
CCL4L2
PIK3R6
TRBV13
TRBV18
TRBV15
GPIHBP1
TRAC
CSTP2
SSTR3
